# Supplementary material for: Sesquiterpenoids from the Florets of Carthamus tinctorius (Safflower) and Their Anti-Atherosclerotic Activity
Source: MDPI journal article supplement (doi:10.3390/nu14245348), 2022-12-16
Supplement: s1 [file s1]

# Supplementary data

## Sesquiterpenoids from the florets of *Carthamus tinctorius* (safflower) and their anti-atherosclerotic activity

Lei Li <sup>1,2,3,†</sup>, Juan Liu <sup>1,2,3,†</sup>, Xinrui Li <sup>1,2,3</sup>, Yuqin Guo <sup>1,2,3</sup>, Yunqiu Fan <sup>1,2,3</sup>, Hongzhen Shu <sup>1,2,3</sup>,  
Guangxu Wu <sup>1,2,3</sup>, Cheng Peng <sup>1,2,\*</sup> and Liang Xiong <sup>1,2,3,\*</sup>

<sup>1</sup> State Key Laboratory of Southwestern Chinese Medicine Resources, Chengdu University of Traditional Chinese Medicine, Chengdu 611137, China

<sup>2</sup> School of Pharmacy, Chengdu University of Traditional Chinese Medicine, Chengdu 611137, China

<sup>3</sup> Institute of Innovative Medicine Ingredients of Southwest Specialty Medicinal Materials, Chengdu University of Traditional Chinese Medicine, Chengdu 611137, China

\* Correspondence: pengcheng@cdutcm.edu.cn (C.P.); xiling0505@126.com (L.X.)

† These authors made equal contributions to this work.

## List of Contents

| No. | Content                                                                                                                                     | Page |
|-----|---------------------------------------------------------------------------------------------------------------------------------------------|------|
| 1   | <b>Text S1. General experimental details</b>                                                                                                | S1   |
| 2   | Text S2. <b>ECD calculation of compound 1</b>                                                                                               | S1   |
| 3   | <b>Figure S1.</b> $\omega$ B97XD/DGDZVP optimized 21 conformers of (1 <i>R</i> ,4 <i>S</i> ,9 <i>S</i> ,11 <i>R</i> )- <b>1</b>             | S3   |
| 4   | <b>Table S1.</b> Energy analysis for the conformers of (1 <i>R</i> ,4 <i>S</i> ,9 <i>S</i> ,11 <i>R</i> )- <b>1</b>                         | S3   |
| 5   | <b>Text S3. ECD calculation of compound 2</b>                                                                                               | S4   |
| 6   | <b>Figure S2.</b> $\omega$ B97XD/DGDZVP optimized 18 conformers of (1 <i>R</i> ,4 <i>R</i> ,9 <i>S</i> ,11 <i>R</i> )- <b>2</b>             | S5   |
| 7   | <b>Table S2.</b> Energy analysis for the conformers of (1 <i>R</i> ,4 <i>R</i> ,9 <i>S</i> ,11 <i>R</i> )- <b>2</b>                         | S5   |
| 8   | <b>Text S4. ECD calculation of compound 3a</b>                                                                                              | S6   |
| 9   | <b>Figure S3.</b> $\omega$ B97XD/DGDZVP optimized 9 conformers of (1 <i>R</i> ,5 <i>S</i> ,8 <i>S</i> ,9 <i>S</i> ,11 <i>R</i> )- <b>3a</b> | S7   |
| 10  | <b>Table S3.</b> Energy analysis for the conformers of (1 <i>R</i> ,5 <i>S</i> ,8 <i>S</i> ,9 <i>S</i> ,11 <i>R</i> )- <b>3a</b>            | S7   |
| 11  | <b>Text S5. ECD calculation of compound 4a</b>                                                                                              | S8   |
| 12  | <b>Figure S4.</b> $\omega$ B97XD/DGDZVP optimized 8 conformers of (1 <i>S</i> ,7 <i>R</i> ,10 <i>S</i> )- <b>4a</b>                         | S9   |
| 13  | <b>Table S4.</b> Energy analysis for the conformers of (1 <i>S</i> ,7 <i>R</i> ,10 <i>S</i> )- <b>4a</b>                                    | S9   |
| 14  | <b>Text S6. ECD calculation of compound 5a</b>                                                                                              | S9   |
| 15  | <b>Figure S5.</b> $\omega$ B97XD/DGDZVP optimized 15 conformers of (2 <i>R</i> ,5 <i>R</i> ,10 <i>R</i> )- <b>5a</b>                        | S10  |
| 16  | <b>Table S5.</b> Energy analysis for the conformers of (2 <i>R</i> ,5 <i>R</i> ,10 <i>R</i> )- <b>5a</b>                                    | S10  |
| 17  | <b>References</b>                                                                                                                           | S11  |
| 18  | <b>Figure S6.</b> The <sup>1</sup> H NMR spectrum of compound <b>1</b> in CD <sub>3</sub> OD                                                | S13  |
| 19  | <b>Figure S7.</b> The <sup>13</sup> C NMR spectrum of compound <b>1</b> in CD <sub>3</sub> OD                                               | S14  |
| 20  | <b>Figure S8.</b> The DEPT spectrum of compound <b>1</b> in CD <sub>3</sub> OD                                                              | S15  |
| 21  | <b>Figure S9.</b> The HSQC spectrum of compound <b>1</b> in CD <sub>3</sub> OD                                                              | S16  |
| 22  | <b>Figure S10.</b> The <sup>1</sup> H- <sup>1</sup> H COSY spectrum of compound <b>1</b> in CD <sub>3</sub> OD                              | S17  |
| 23  | <b>Figure S11.</b> The HMBC spectrum of compound <b>1</b> in CD <sub>3</sub> OD                                                             | S18  |
| 24  | <b>Figure S12.</b> The NOESY spectrum of compound <b>1</b> in CD <sub>3</sub> OD                                                            | S19  |
| 25  | <b>Figure S13.</b> The IR spectrum of compound <b>1</b>                                                                                     | S20  |
| 26  | <b>Figure S14.</b> The (+)-HR-ESI-MS spectroscopic data of compound <b>1</b>                                                                | S21  |
| 27  | <b>Figure S15.</b> The <sup>1</sup> H NMR spectrum of compound <b>2</b> in CD <sub>3</sub> OD                                               | S22  |
| 28  | <b>Figure S16.</b> The <sup>13</sup> C NMR spectrum of compound <b>2</b> in CD <sub>3</sub> OD                                              | S23  |
| 29  | <b>Figure S17.</b> The DEPT spectrum of compound <b>2</b> in CD <sub>3</sub> OD                                                             | S24  |
| 30  | <b>Figure S18.</b> The HSQC spectrum of compound <b>2</b> in CD <sub>3</sub> OD                                                             | S25  |
| 31  | <b>Figure S19.</b> The <sup>1</sup> H- <sup>1</sup> H COSY spectrum of compound <b>2</b> in CD <sub>3</sub> OD                              | S26  |
| 32  | <b>Figure S20.</b> The HMBC spectrum of compound <b>2</b> in CD <sub>3</sub> OD                                                             | S27  |
| 33  | <b>Figure S21.</b> The NOESY spectrum of compound <b>2</b> in CD <sub>3</sub> OD                                                            | S28  |
| 34  | <b>Figure S22.</b> The 1D NOE spectrum of compound <b>2</b> in CD <sub>3</sub> OD                                                           | S29  |
| 35  | <b>Figure S23.</b> The IR spectrum of compound <b>2</b>                                                                                     | S30  |
| 36  | <b>Figure S24.</b> The (+)-HR-ESI-MS spectroscopic data of compound <b>2</b>                                                                | S31  |
| 37  | <b>Figure S25.</b> The <sup>1</sup> H NMR spectrum of compound <b>3</b> in CD <sub>3</sub> OD                                               | S32  |
| 38  | <b>Figure S26.</b> The <sup>13</sup> C NMR spectrum of compound <b>3</b> in CD <sub>3</sub> OD                                              | S33  |
| 39  | <b>Figure S27.</b> The DEPT spectrum of compound <b>3</b> in CD <sub>3</sub> OD                                                             | S34  |
| 40  | <b>Figure S28.</b> The HSQC spectrum of compound <b>3</b> in CD <sub>3</sub> OD                                                             | S35  |

|    |                                                                                                                 |     |
|----|-----------------------------------------------------------------------------------------------------------------|-----|
| 41 | <b>Figure S29.</b> The $^1\text{H}$ - $^1\text{H}$ COSY spectrum of compound <b>3</b> in $\text{CD}_3\text{OD}$ | S36 |
| 42 | <b>Figure S30.</b> The HMBC spectrum of compound <b>3</b> in $\text{CD}_3\text{OD}$                             | S37 |
| 43 | <b>Figure S31.</b> The NOESY spectrum of compound <b>3</b> in $\text{CD}_3\text{OD}$                            | S38 |
| 44 | <b>Figure S32.</b> The 1D NOE spectrum of compound <b>3</b> in $\text{CD}_3\text{OD}$                           | S39 |
| 45 | <b>Figure S33.</b> The IR spectrum of compound <b>3</b>                                                         | S40 |
| 46 | <b>Figure S34.</b> The (+)-HR-ESI-MS spectroscopic data of compound <b>3</b>                                    | S41 |
| 47 | <b>Figure S35.</b> The $^1\text{H}$ NMR spectrum of compound <b>3a</b> in $\text{CD}_3\text{OD}$                | S42 |
| 48 | <b>Figure S36.</b> The (+)-HR-ESI-MS spectroscopic data of compound <b>3a</b>                                   | S43 |
| 49 | <b>Figure S37.</b> The $^1\text{H}$ NMR spectrum of compound <b>4</b> in $\text{CD}_3\text{OD}$                 | S44 |
| 50 | <b>Figure S38.</b> The $^{13}\text{C}$ NMR spectrum of compound <b>4</b> in $\text{CD}_3\text{OD}$              | S45 |
| 51 | <b>Figure S39.</b> The DEPT spectrum of compound <b>4</b> in $\text{CD}_3\text{OD}$                             | S46 |
| 52 | <b>Figure S40.</b> The HSQC spectrum of compound <b>4</b> in $\text{CD}_3\text{OD}$                             | S47 |
| 53 | <b>Figure S41.</b> The $^1\text{H}$ - $^1\text{H}$ COSY spectrum of compound <b>4</b> in $\text{CD}_3\text{OD}$ | S48 |
| 54 | <b>Figure S42.</b> The HMBC spectrum of compound <b>4</b> in $\text{CD}_3\text{OD}$                             | S49 |
| 55 | <b>Figure S43.</b> The NOESY spectrum of compound <b>4</b> in $\text{CD}_3\text{OD}$                            | S50 |
| 56 | <b>Figure S44.</b> The IR spectrum of compound <b>4</b>                                                         | S51 |
| 57 | <b>Figure S45.</b> The (+)-HR-ESI-MS spectroscopic data of compound <b>4</b>                                    | S52 |
| 58 | <b>Figure S46.</b> The $^1\text{H}$ NMR spectrum of compound <b>4a</b> in $\text{CD}_3\text{OD}$                | S53 |
| 59 | <b>Figure S47.</b> The (+)-HR-ESI-MS spectroscopic data of compound <b>4a</b>                                   | S54 |
| 60 | <b>Figure S48.</b> The $^1\text{H}$ NMR spectrum of compound <b>5</b> in $\text{CD}_3\text{OD}$                 | S55 |
| 61 | <b>Figure S49.</b> The $^{13}\text{C}$ NMR spectrum of compound <b>5</b> in $\text{CD}_3\text{OD}$              | S56 |
| 62 | <b>Figure S50.</b> The DEPT spectrum of compound <b>5</b> in $\text{CD}_3\text{OD}$                             | S57 |
| 63 | <b>Figure S51.</b> The HSQC spectrum of compound <b>5</b> in $\text{CD}_3\text{OD}$                             | S58 |
| 64 | <b>Figure S52.</b> The $^1\text{H}$ - $^1\text{H}$ COSY spectrum of compound <b>5</b> in $\text{CD}_3\text{OD}$ | S59 |
| 65 | <b>Figure S53.</b> The HMBC spectrum of compound <b>5</b> in $\text{CD}_3\text{OD}$                             | S60 |
| 66 | <b>Figure S54.</b> The NOESY spectrum of compound <b>5</b> in $\text{CD}_3\text{OD}$                            | S61 |
| 67 | <b>Figure S55.</b> The IR spectrum of compound <b>5</b>                                                         | S62 |
| 68 | <b>Figure S56.</b> The (+)-HR-ESI-MS spectroscopic data of compound <b>5</b>                                    | S63 |
| 69 | <b>Figure S57.</b> The $^1\text{H}$ NMR spectrum of compound <b>5a</b> in $\text{CD}_3\text{OD}$                | S64 |
| 70 | <b>Figure S58.</b> The (+)-HR-ESI-MS spectroscopic data of compound <b>5a</b>                                   | S65 |

### **Text S1. General experimental details.**

NMR spectra were recorded on a Bruker AVANCE NEO 600 instrument (Bruker Corporation, MA, USA) with the solvent peaks as reference standards. HR-ESI-MS analyses were measured on a Bruker timsTOF-MS instrument (Bruker Corporation, MA, USA). IR spectra were obtained on a Spectrum One FT-IR spectrometer (Perkin-Elmer, Inc., CA, USA). ECD spectra were measured by an Applied Photophysics Chirascan and Chirascan-plus circular dichroism spectrometer (Applied Photophysics Ltd., Leatherhead, England). Optical rotations were recorded by an Anton Paar MCP 200 polarimeter (Anton Paar GmbH, Graz, Austria). Absorbance was measured with a Molecular Devices SpectraMax iD3 microplate reader (Molecular Devices, LLC., CA, USA). Cells were observed with a Leica DMI1 Inverted microscope (Leica Microsystems GmbH, Wetzlar, Germany).

### **Text S2. ECD calculation of compound 1.**

**ECD calculation of (1*R*, 4*S*, 9*S*, 11*R*)-1** Conformation searches based on molecular mechanics with MMFF94s force field were performed for (1*R*, 4*S*, 9*S*, 11*R*)-**1** and gave 21 conformers with relative energies within 2 kcal/mol <sup>[1]</sup>. The selected conformers were optimized using DFT at the B3LYP/6-31G (d) level in a vacuum with the Gaussian 16 program (Table S1) <sup>[2]</sup>. The B3LYP/6-31G (d)-optimized conformers (Boltzmann distribution  $\geq 1\%$ ) were then reoptimized at the  $\omega$ B97XD/DGDZVP level in acetonitrile. ECD computations for the  $\omega$ B97XD/DGDZVP-optimized conformers (Figure S1) were conducted at the CAM-B3LYP/DGDZVP level in acetonitrile <sup>[3]</sup>. According to the Boltzmann distribution theory and the relative Gibbs free energy ( $\Delta G$ ), the ECD spectrum for (1*R*, 4*S*, 9*S*, 11*R*)-**1** was generated using SpecDis 1.71 with  $\sigma = 0.3$  eV and a UV shift of +13 nm <sup>[4]</sup>. The results showed that the theoretically calculated ECD spectrum of (1*R*, 4*S*, 9*S*, 11*R*)-**1** was in good agreement with the experimental ECD spectrum of **1**.



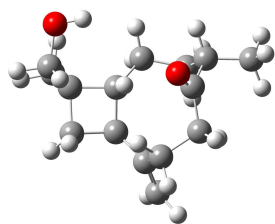

**1C1**

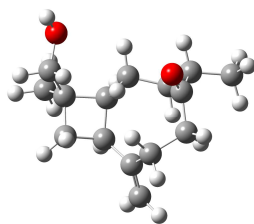

**1C2**

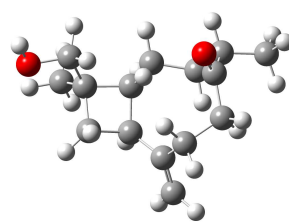

**1C3**

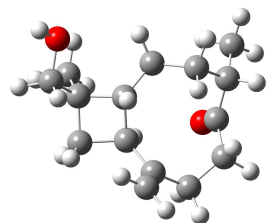

**1C4**

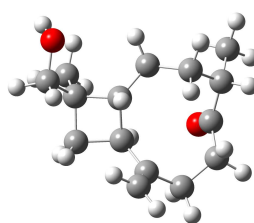

**1C5**

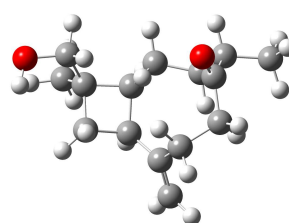

**1C6**

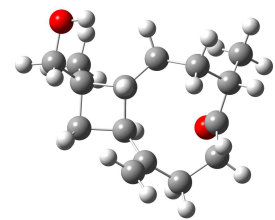

**1C7**

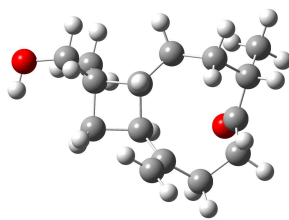

**1C8**

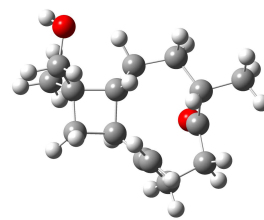

**1C9**

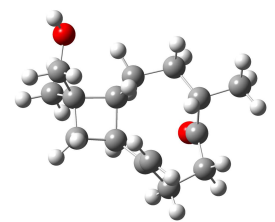

**1C10**

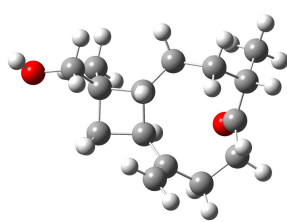

**1C11**

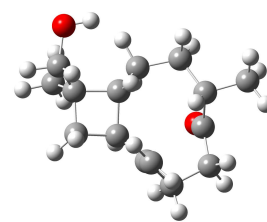

**1C12**

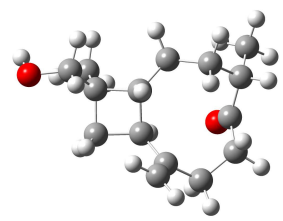

**1C13**

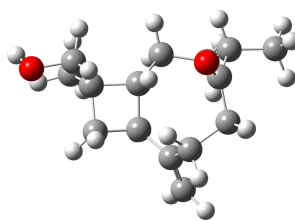

**1C14**

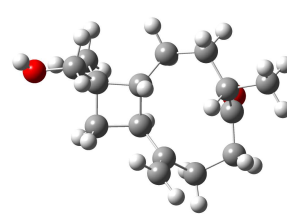

**1C15**

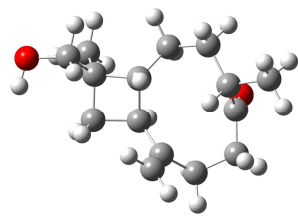

**1C16**

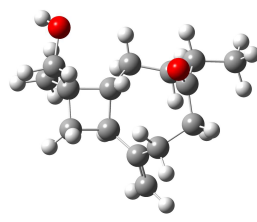

**1C17**

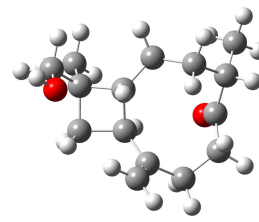

**1C18**

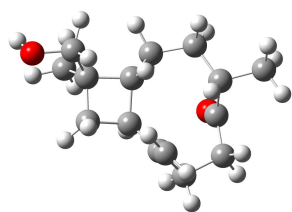

**1C19**

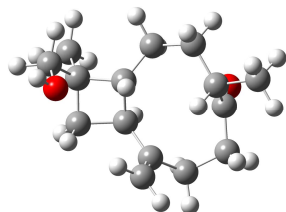

**1C20**

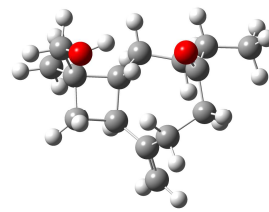

**1C21**

**Figure S1.**  $\omega$ B97XD/DGDZVP optimized 21 conformers of (1*R*, 4*S*, 9*S*, 11*R*)-1.

**Table S1.** Energy analysis for the conformers of (1*R*, 4*S*, 9*S*, 11*R*)-1.

| Conf.       | MMFF<br>energy           | B3LYP/6-31G(d) Gibbs free energy<br>(298.15 K) |                          |                           | $\omega$ B97XD/DGDZVP Gibbs free energy<br>(298.15 K) |                          |                           |
|-------------|--------------------------|------------------------------------------------|--------------------------|---------------------------|-------------------------------------------------------|--------------------------|---------------------------|
|             | $\Delta E$<br>(Kcal/mol) | G<br>(Hartree)                                 | $\Delta G$<br>(Kcal/mol) | Boltzmann<br>distribution | G<br>(Hartree)                                        | $\Delta G$<br>(Kcal/mol) | Boltzmann<br>distribution |
| <b>1C1</b>  | 0.00                     | -736.120131                                    | 0.0000                   | 0.038                     | -735.993738                                           | 0.0000                   | 0.114                     |
| <b>1C2</b>  | 0.16                     | -736.119346                                    | 0.4930                   | 0.017                     | -735.99282                                            | 0.5760                   | 0.043                     |
| <b>1C3</b>  | 0.40                     | -736.118774                                    | 0.8520                   | 0.009                     | -735.992528                                           | 0.7590                   | 0.031                     |
| <b>1C4</b>  | 0.47                     | -736.120513                                    | -0.2400                  | 0.057                     | -735.992023                                           | 1.0760                   | 0.018                     |
| <b>1C5</b>  | 0.51                     | -736.120747                                    | -0.3870                  | 0.073                     | -735.992547                                           | 0.7470                   | 0.032                     |
| <b>1C6</b>  | 0.59                     | -736.119514                                    | 0.3870                   | 0.02                      | -735.993129                                           | 0.3820                   | 0.06                      |
| <b>1C7</b>  | 0.76                     | -736.120614                                    | -0.3030                  | 0.063                     | -735.992599                                           | 0.7150                   | 0.034                     |
| <b>1C8</b>  | 0.87                     | -736.120654                                    | -0.3280                  | 0.066                     | -735.993147                                           | 0.3710                   | 0.061                     |
| <b>1C9</b>  | 0.92                     | -736.119893                                    | 0.1490                   | 0.03                      | -735.992893                                           | 0.5300                   | 0.046                     |
| <b>1C10</b> | 0.95                     | -736.119634                                    | 0.3120                   | 0.022                     | -735.992012                                           | 1.0830                   | 0.018                     |
| <b>1C11</b> | 1.08                     | -736.119532                                    | 0.3760                   | 0.02                      | -735.992223                                           | 0.9510                   | 0.023                     |
| <b>1C12</b> | 1.10                     | -736.119958                                    | 0.1090                   | 0.032                     | -735.992869                                           | 0.5450                   | 0.045                     |
| <b>1C13</b> | 1.14                     | -736.11987                                     | 0.1640                   | 0.029                     | -735.992499                                           | 0.7770                   | 0.031                     |
| <b>1C14</b> | 1.25                     | -736.118636                                    | 0.9380                   | 0.008                     | -735.992687                                           | 0.6600                   | 0.037                     |
| <b>1C15</b> | 1.26                     | -736.11911                                     | 0.6410                   | 0.013                     | -735.992166                                           | 0.9860                   | 0.021                     |
| <b>1C16</b> | 1.28                     | -736.120036                                    | 0.0600                   | 0.034                     | -735.993091                                           | 0.4060                   | 0.057                     |
| <b>1C17</b> | 1.29                     | -736.118713                                    | 0.8900                   | 0.008                     | -735.993125                                           | 0.3850                   | 0.059                     |
| <b>1C18</b> | 1.36                     | -736.121206                                    | -0.6750                  | 0.119                     | -735.992631                                           | 0.6950                   | 0.035                     |

|             |      |             |         |       |            |         |       |
|-------------|------|-------------|---------|-------|------------|---------|-------|
| <b>1C19</b> | 1.37 | -736.119432 | 0.4390  | 0.018 | -735.99256 | 0.7390  | 0.033 |
| <b>1C20</b> | 1.47 | -736.120841 | -0.4460 | 0.081 | -735.99252 | 0.7640  | 0.031 |
| <b>1C21</b> | 1.64 | -736.121888 | -1.1030 | 0.244 | -735.99412 | -0.2400 | 0.17  |

### Text S3. ECD calculation of compound 2.

**ECD calculation of (1*R*, 4*R*, 9*S*, 11*R*)-2** Conformation searches based on molecular mechanics with MMFF94s force field were performed for (1*R*, 4*R*, 9*S*, 11*R*)-**2** and gave 18 conformers with relative energies within 2 kcal/mol <sup>[1]</sup>. The selected conformers were optimized using DFT at the B3LYP/6-31G (d) level in a vacuum with the Gaussian 16 program ([Table S2](#)) <sup>[2]</sup>. The B3LYP/6-31G (d)-optimized conformers (Boltzmann distribution  $\geq 1\%$ ) were then reoptimized at the  $\omega$ B97XD/DGDZVP level in acetonitrile. ECD computations for the  $\omega$ B97XD/DGDZVP-optimized conformers ([Figure S2](#)) were conducted at the CAM-B3LYP/DGDZVP level in acetonitrile <sup>[3]</sup>. According to the Boltzmann distribution theory and the relative Gibbs free energy ( $\Delta G$ ), the ECD spectrum for (1*R*, 4*R*, 9*S*, 11*R*)-**2** was generated using SpecDis 1.71 with  $\sigma = 0.3$  eV and a UV shift of +15 nm <sup>[4]</sup>. The results showed that the theoretically ECD spectrum of (1*R*, 4*R*, 9*S*, 11*R*)-**2** was in good agreement with the experimental ECD spectrum of **2**.

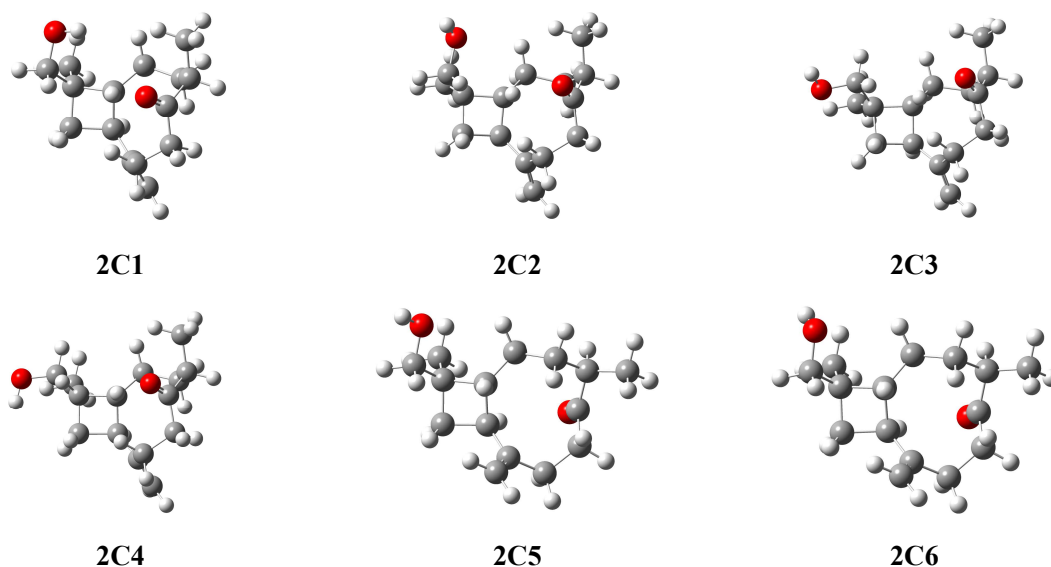

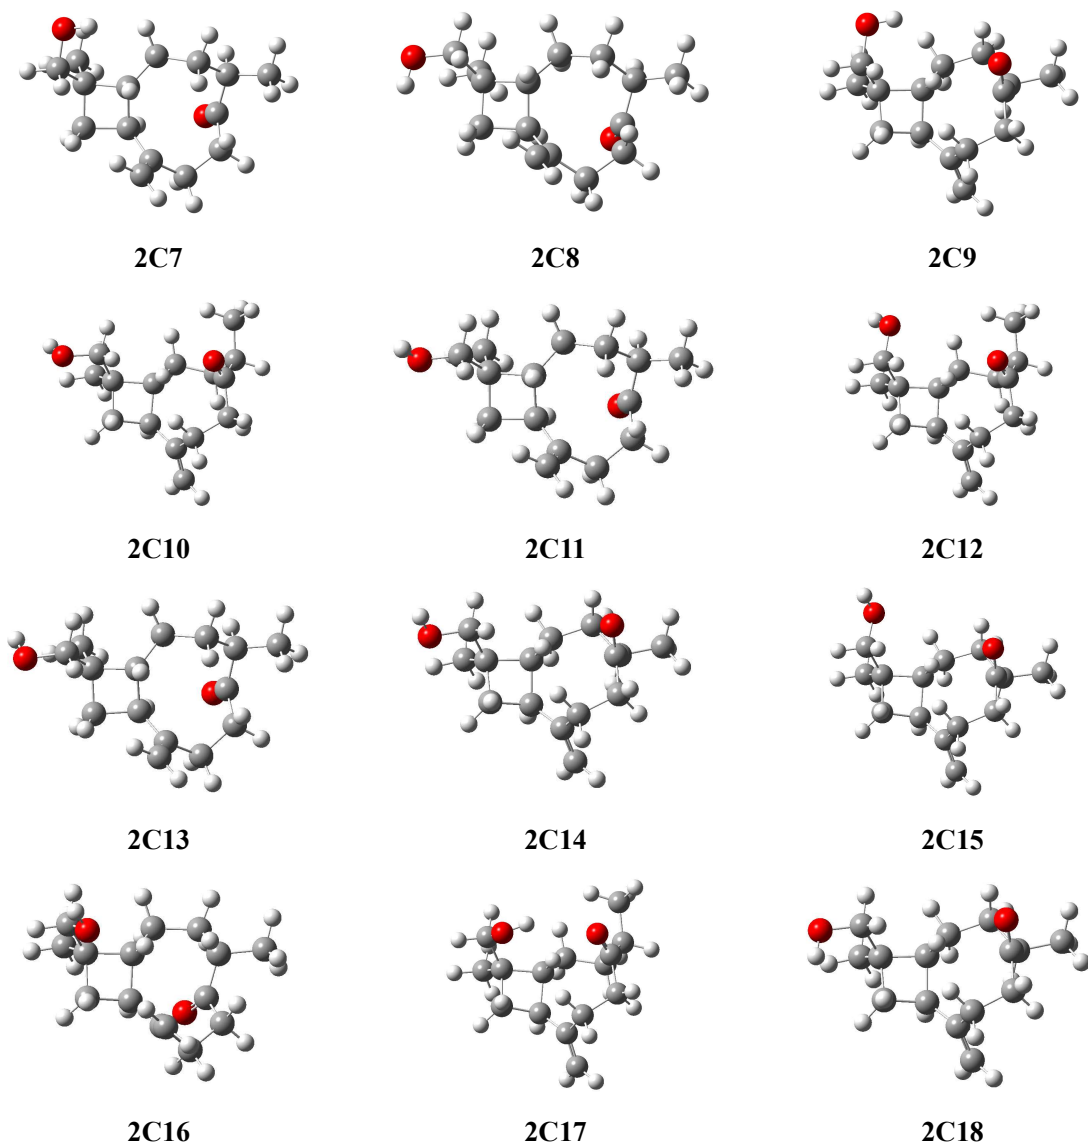

**Figure S2.**  $\omega$ B97XD/DGDZVP optimized 18 conformers of (1*R*, 4*R*, 9*S*, 11*R*)-2.

**Table S2.** Energy analysis for the conformers of (1*R*, 4*R*, 9*S*, 11*R*)-2.

| Conf.      | MMFF                     | B3LYP/6-31G(d) Gibbs free energy |                          |                           | $\omega$ B97XD/DGDZVP Gibbs free energy |                          |                           |
|------------|--------------------------|----------------------------------|--------------------------|---------------------------|-----------------------------------------|--------------------------|---------------------------|
|            | energy                   | (298.15 K)                       |                          |                           | (298.15 K)                              |                          |                           |
|            | $\Delta E$<br>(Kcal/mol) | G<br>(Hartree)                   | $\Delta G$<br>(Kcal/mol) | Boltzmann<br>distribution | G<br>(Hartree)                          | $\Delta G$<br>(Kcal/mol) | Boltzmann<br>distribution |
| <b>2C1</b> | 0.00                     | -736.120507                      | 0.0000                   | 0.068                     | -735.993915                             | 0.0000                   | 0.136                     |
| <b>2C2</b> | 0.20                     | -736.119977                      | 0.3330                   | 0.039                     | -735.99335                              | 0.3550                   | 0.075                     |
| <b>2C3</b> | 0.45                     | -736.11906                       | 0.9080                   | 0.015                     | -735.992955                             | 0.6020                   | 0.049                     |
| <b>2C4</b> | 0.64                     | -736.119804                      | 0.4410                   | 0.032                     | -735.993786                             | 0.0810                   | 0.119                     |

|             |      |             |         |       |             |         |       |
|-------------|------|-------------|---------|-------|-------------|---------|-------|
| <b>2C5</b>  | 0.72 | -736.119923 | 0.3660  | 0.036 | -735.991848 | 1.2970  | 0.015 |
| <b>2C6</b>  | 0.77 | -736.120159 | 0.2180  | 0.047 | -735.992384 | 0.9610  | 0.027 |
| <b>2C7</b>  | 1.04 | -736.119934 | 0.3600  | 0.037 | -735.992441 | 0.9250  | 0.028 |
| <b>2C8</b>  | 1.14 | -736.120013 | 0.3100  | 0.04  | -735.992683 | 0.7730  | 0.037 |
| <b>2C9</b>  | 1.16 | -736.120064 | 0.2780  | 0.042 | -735.992956 | 0.6020  | 0.049 |
| <b>2C10</b> | 1.31 | -736.118916 | 0.9980  | 0.013 | -735.993362 | 0.3470  | 0.076 |
| <b>2C11</b> | 1.34 | -736.118922 | 0.9950  | 0.013 | -735.991792 | 1.3320  | 0.014 |
| <b>2C12</b> | 1.35 | -736.119393 | 0.6990  | 0.021 | -735.993884 | 0.0190  | 0.131 |
| <b>2C13</b> | 1.42 | -736.119274 | 0.7740  | 0.018 | -735.992171 | 1.0940  | 0.021 |
| <b>2C14</b> | 1.46 | -736.118962 | 0.9700  | 0.013 | -735.991468 | 1.5360  | 0.01  |
| <b>2C15</b> | 1.50 | -736.119222 | 0.8060  | 0.017 | -735.99156  | 1.4780  | 0.011 |
| <b>2C16</b> | 1.61 | -736.120593 | -0.0540 | 0.074 | -735.992337 | 0.9900  | 0.026 |
| <b>2C17</b> | 1.65 | -736.122288 | -1.1180 | 0.447 | -735.994022 | -0.0670 | 0.152 |
| <b>2C18</b> | 1.73 | -736.119673 | 0.5230  | 0.028 | -735.992251 | 1.0440  | 0.023 |

#### Text S4. ECD calculation of compound 3a.

**ECD calculation of (1*R*, 5*S*, 8*S*, 9*S*, 11*R*)-3a** Conformation searches based on molecular mechanics with MMFF94s force field were performed for (1*R*, 5*S*, 8*S*, 9*S*, 11*R*)-**3a** and gave 9 conformers with relative energies within 2 kcal/mol <sup>[1]</sup>. The selected conformers were optimized using DFT at the B3LYP/6-31G (d) level in a vacuum with the Gaussian 16 program (Table S3) <sup>[2]</sup>. The B3LYP/6-31G (d)-optimized conformers (Boltzmann distribution  $\geq 1\%$ ) were then reoptimized at the  $\omega$ B97XD/DGDZVP level in acetonitrile. ECD computations for the  $\omega$ B97XD/DGDZVP-optimized conformers (Figure S3) were conducted at the CAM-B3LYP/DGDZVP level in acetonitrile <sup>[3]</sup>. According to the Boltzmann distribution theory and the relative Gibbs free energy ( $\Delta G$ ), the ECD spectrum for (1*R*, 5*S*, 8*S*, 9*S*, 11*R*)-**3a** was generated using SpecDis 1.71 with  $\sigma = 0.3$  eV and a UV shift of +19 nm <sup>[4]</sup>. The results showed that the theoretically calculated ECD

spectrum of (1*R*, 5*S*, 8*S*, 9*S*, 11*R*)-**3a** was in good agreement with the experimental ECD spectrum of **3a**.

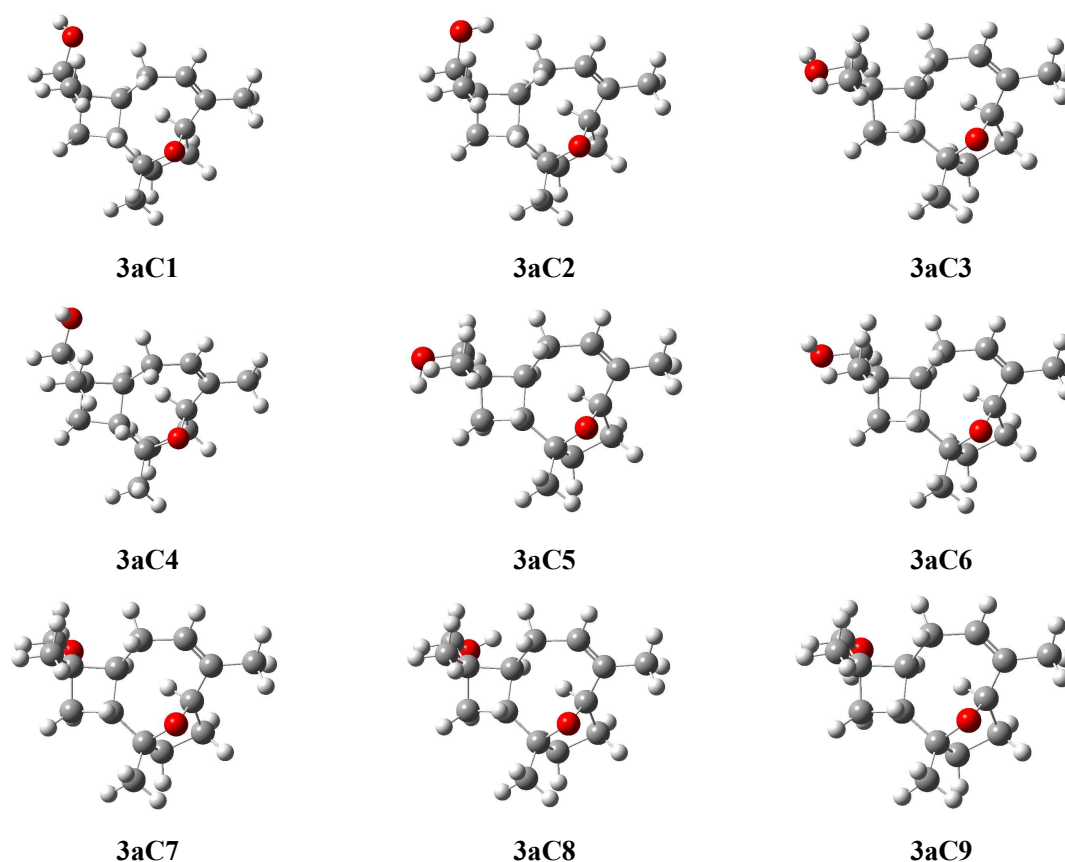

**Figure S3.**  $\omega$ B97XD/DGDZVP optimized 9 conformers of (1*R*, 5*S*, 8*S*, 9*S*, 11*R*)-**3a**.

**Table S3.** Energy analysis for the conformers of (1*R*, 5*S*, 8*S*, 9*S*, 11*R*)-**3a**.

| Conf.       | MMFF                     | B3LYP/6-31G(d) Gibbs free energy |                          |                           | $\omega$ B97XD/DGDZVP Gibbs free energy |                          |                           |
|-------------|--------------------------|----------------------------------|--------------------------|---------------------------|-----------------------------------------|--------------------------|---------------------------|
|             | energy                   | (298.15 K)                       |                          |                           | (298.15 K)                              |                          |                           |
|             | $\Delta E$<br>(Kcal/mol) | G<br>(Hartree)                   | $\Delta G$<br>(Kcal/mol) | Boltzmann<br>distribution | G<br>(Hartree)                          | $\Delta G$<br>(Kcal/mol) | Boltzmann<br>distribution |
| <b>3aC1</b> | 0.00                     | -736.066449                      | 0.0000                   | 0.082                     | -735.937248                             | 0.0000                   | 0.085                     |
| <b>3aC2</b> | 0.20                     | -736.066724                      | -0.1730                  | 0.109                     | -735.937345                             | -0.0610                  | 0.094                     |
| <b>3aC3</b> | 0.21                     | -736.065589                      | 0.5400                   | 0.033                     | -735.9369                               | 0.2180                   | 0.059                     |
| <b>3aC4</b> | 0.31                     | -736.06658                       | -0.0820                  | 0.094                     | -735.937423                             | -0.1100                  | 0.102                     |
| <b>3aC5</b> | 0.46                     | -736.066703                      | -0.1590                  | 0.107                     | -735.937879                             | -0.3960                  | 0.165                     |
| <b>3aC6</b> | 0.46                     | -736.06581                       | 0.4010                   | 0.042                     | -735.937225                             | 0.0140                   | 0.083                     |

|             |      |             |         |       |             |         |       |
|-------------|------|-------------|---------|-------|-------------|---------|-------|
| <b>3aC7</b> | 0.86 | -736.067086 | -0.4000 | 0.161 | -735.937281 | -0.0210 | 0.088 |
| <b>3aC8</b> | 1.65 | -736.066985 | -0.3360 | 0.144 | -735.937459 | -0.1320 | 0.106 |
| <b>3aC9</b> | 1.77 | -736.067418 | -0.6080 | 0.228 | -735.938146 | -0.5640 | 0.219 |

#### Text S5. ECD calculation of compound 4a.

**ECD calculation of (1*S*, 7*R*, 10*S*)-4a** Conformation searches based on molecular mechanics with MMFF94s force field were performed for (1*S*, 7*R*, 10*S*)-**4a** and gave 8 conformers with relative energies within 2 kcal/mol <sup>[1]</sup>. The selected conformers were optimized using DFT at the B3LYP/6-31G (d) level in a vacuum with the Gaussian 16 program (Table S4) <sup>[2]</sup>. The B3LYP/6-31G (d)-optimized conformers (Boltzmann distribution  $\geq 1\%$ ) were then reoptimized at the  $\omega$ B97XD/DGDZVP level in acetonitrile. ECD computations for the  $\omega$ B97XD/DGDZVP-optimized conformers (Figure S4) were conducted at the CAM-B3LYP/DGDZVP level in acetonitrile <sup>[3]</sup>. According to the Boltzmann distribution theory and the relative Gibbs free energy ( $\Delta G$ ), the ECD spectrum for (1*S*, 7*R*, 10*S*)-**4a** was generated using SpecDis 1.71 with  $\sigma = 0.3$  eV and a UV shift of +16 nm <sup>[4]</sup>. The results showed that the theoretically calculated ECD spectrum of (1*S*, 7*R*, 10*S*)-**4a** was in good agreement with the experimental ECD spectrum of **4a**.

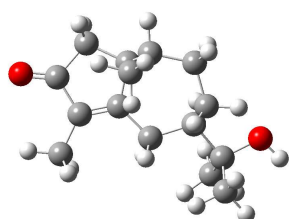

**4aC1**

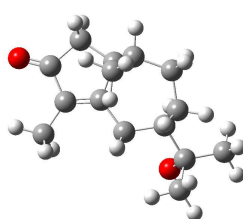

**4aC2**

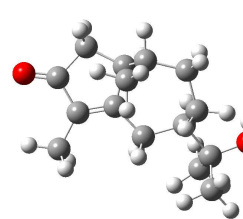

**4aC3**

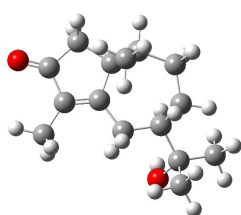

**4aC4**

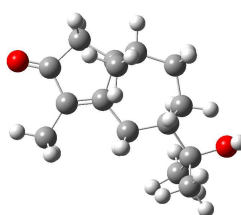

**4aC5**

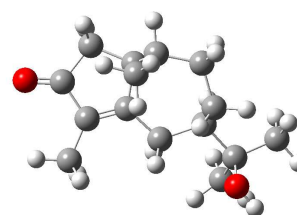

**4aC6**

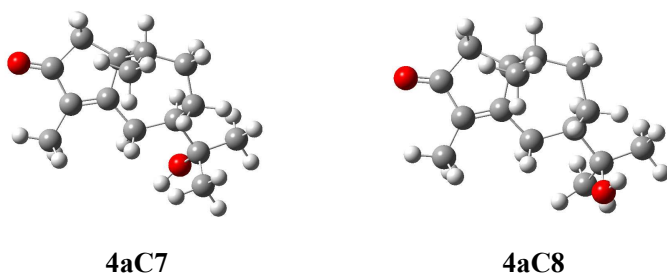

**Figure S4.**  $\omega$ B97XD/DGDZVP optimized 8 conformers of (1*S*, 7*R*, 10*S*)-**4a**.

**Table S4.** Energy analysis for the conformers of (1*S*, 7*R*, 10*S*)-**4a**.

| Conf.       | MMFF<br>energy           | B3LYP/6-31G(d) Gibbs free energy<br>(298.15 K) |                          |                           | $\omega$ B97XD/DGDZVP Gibbs free energy<br>(298.15 K) |                          |                           |
|-------------|--------------------------|------------------------------------------------|--------------------------|---------------------------|-------------------------------------------------------|--------------------------|---------------------------|
|             | $\Delta E$<br>(Kcal/mol) | G<br>(Hartree)                                 | $\Delta G$<br>(Kcal/mol) | Boltzmann<br>distribution | G<br>(Hartree)                                        | $\Delta G$<br>(Kcal/mol) | Boltzmann<br>distribution |
| <b>4aC1</b> | 0                        | -736.176582                                    | 0.0000                   | 0.155                     | -736.047219                                           | 0.0000                   | 0.104                     |
| <b>4aC2</b> | 0.0389                   | -736.176914                                    | -0.2080                  | 0.221                     | -736.047702                                           | -0.3030                  | 0.173                     |
| <b>4aC3</b> | 0.1623                   | -736.176889                                    | -0.1930                  | 0.215                     | -736.047793                                           | -0.3600                  | 0.191                     |
| <b>4aC4</b> | 0.2522                   | -736.177044                                    | -0.2900                  | 0.253                     | -736.048114                                           | -0.5620                  | 0.268                     |
| <b>4aC5</b> | 0.9967                   | -736.175895                                    | 0.4310                   | 0.075                     | -736.047176                                           | 0.0270                   | 0.099                     |
| <b>4aC6</b> | 1.2134                   | -736.174519                                    | 1.2950                   | 0.017                     | -736.04495                                            | 1.4240                   | 0.009                     |
| <b>4aC7</b> | 1.5069                   | -736.175496                                    | 0.6810                   | 0.049                     | -736.047492                                           | -0.1710                  | 0.139                     |
| <b>4aC8</b> | 1.7133                   | -736.174371                                    | 1.3870                   | 0.015                     | -736.045443                                           | 1.1140                   | 0.016                     |

#### Text S6. ECD calculation of compound **5a**.

**ECD calculation of (2*R*, 5*R*, 10*R*)-**5a**** Conformation searches based on molecular mechanics with MMFF94s force field were performed for (2*R*, 5*R*, 10*R*)-**5a** and gave 15 conformers with relative energies within 2 kcal/mol <sup>[1]</sup>. The selected conformers were optimized using DFT at the B3LYP/6-31G (d) level in a vacuum with the Gaussian 16 program (Table S5) <sup>[2]</sup>. The B3LYP/6-31G (d)-optimized conformers (Boltzmann distribution  $\geq 1\%$ ) were then reoptimized at the  $\omega$ B97XD/DGDZVP level in acetonitrile. ECD computations for the  $\omega$ B97XD/DGDZVP-optimized



conformers (Figure S5) were conducted at the CAM-B3LYP/DGDZVP level in acetonitrile [3]. According to the Boltzmann distribution theory and the relative Gibbs free energy ( $\Delta G$ ), the ECD spectrum for (2*R*, 5*R*, 10*R*)-**5a** was generated using SpecDis 1.71 with  $\sigma = 0.3$  eV and a UV shift of +9 nm [4]. The results showed that the theoretically calculated ECD spectrum of (2*R*, 5*R*, 10*R*)-**5a** was in good agreement with the experimental ECD spectrum of **5a**.

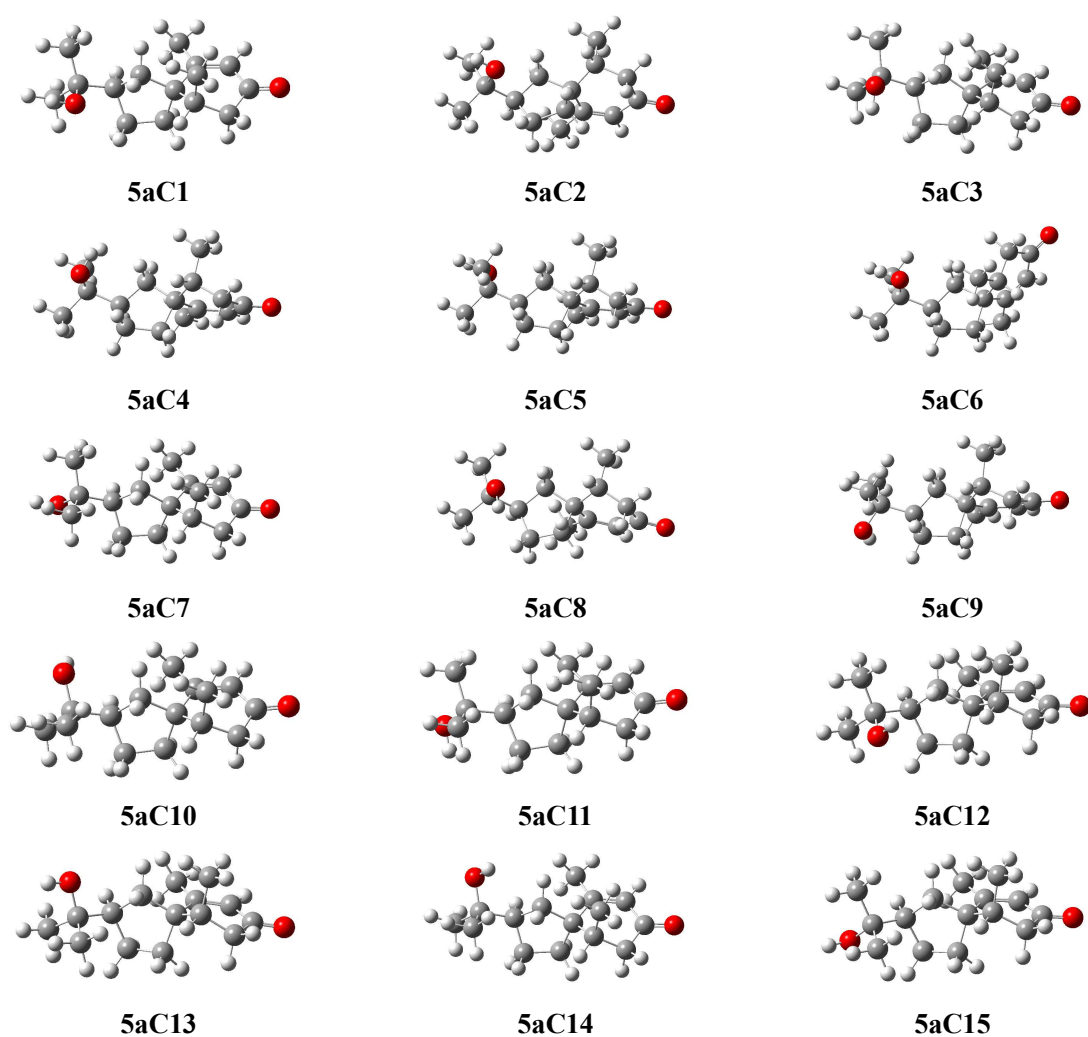

**Figure S5.**  $\omega$ B97XD/DGDZVP optimized 15 conformers of (2*R*, 5*R*, 10*R*)-**5a**.

**Table S5.** Energy analysis for the conformers of (2*R*, 5*R*, 10*R*)-**5a**.

| Conf. | MMFF                     | B3LYP/6-31G(d) Gibbs free energy |                          |                           | $\omega$ B97XD/DGDZVP Gibbs free energy |                          |                           |
|-------|--------------------------|----------------------------------|--------------------------|---------------------------|-----------------------------------------|--------------------------|---------------------------|
|       | energy                   | (298.15 K)                       |                          |                           | (298.15 K)                              |                          |                           |
|       | $\Delta E$<br>(Kcal/mol) | G<br>(Hartree)                   | $\Delta G$<br>(Kcal/mol) | Boltzmann<br>distribution | G<br>(Hartree)                          | $\Delta G$<br>(Kcal/mol) | Boltzmann<br>distribution |

|              |        |             |        |       |             |         |       |
|--------------|--------|-------------|--------|-------|-------------|---------|-------|
| <b>5aC1</b>  | 0      | -736.166712 | 0.0000 | 0.311 | -736.039067 | 0.0000  | 0.154 |
| <b>5aC2</b>  | 0.7747 | -736.164429 | 1.4330 | 0.028 | -736.037554 | 0.9490  | 0.031 |
| <b>5aC3</b>  | 0.7816 | -736.166339 | 0.2340 | 0.21  | -736.039224 | -0.0990 | 0.182 |
| <b>5aC4</b>  | 1.0086 | -736.165815 | 0.5630 | 0.12  | -736.038724 | 0.2150  | 0.107 |
| <b>5aC5</b>  | 1.4622 | -736.164902 | 1.1360 | 0.046 | -736.037867 | 0.7530  | 0.043 |
| <b>5aC6</b>  | 1.5295 | -736.165654 | 0.6640 | 0.102 | -736.037916 | 0.7220  | 0.046 |
| <b>5aC7</b>  | 1.5659 | -736.164635 | 1.3030 | 0.034 | -736.037907 | 0.7280  | 0.045 |
| <b>5aC8</b>  | 1.5704 | -736.163803 | 1.8250 | 0.014 | -736.037796 | 0.7980  | 0.04  |
| <b>5aC9</b>  | 1.8365 | -736.164467 | 1.4090 | 0.029 | -736.038403 | 0.4170  | 0.076 |
| <b>5aC10</b> | 1.8523 | -736.164605 | 1.3220 | 0.033 | -736.03853  | 0.3370  | 0.087 |
| <b>5aC11</b> | 1.9233 | -736.164398 | 1.4520 | 0.027 | -736.03815  | 0.5750  | 0.058 |
| <b>5aC12</b> | 1.9348 | -736.163543 | 1.9890 | 0.011 | -736.037611 | 0.9140  | 0.033 |
| <b>5aC13</b> | 2.0118 | -736.162627 | 2.5630 | 0.004 | -736.037236 | 1.1490  | 0.022 |
| <b>5aC14</b> | 2.0247 | -736.164395 | 1.4540 | 0.027 | -736.037984 | 0.6800  | 0.049 |
| <b>5aC15</b> | 2.0311 | -736.162542 | 2.6170 | 0.004 | -736.037384 | 1.0560  | 0.026 |

## References

- [1] (a) Goto, H.; Osawa, E. Corner flapping: a simple and fast algorithm for exhaustive generation of ring conformations. *J. Am. Chem. Soc.* **1989**, *111*, 8950-8951. (b) Goto, H.; Osawa, E. An efficient algorithm for searching low-energy conformers of cyclic and acyclic molecules. *J. Chem. Soc., Perkin Trans. 2* **1993**, *2*, 187-198.
- [2] Frisch, M.J.; Trucks, G.W.; Schlegel, H.B.; Scuseria, G.E.; Robb, M.A.; Cheeseman, J.R.; Scalmani, G.; Barone, V.; Petersson, G.A.; Nakatsuji, H.; Li, X.; Caricato, M.; Marenich, A.V.; Bloino, J.; Janesko, B.G.; Gomperts, R.; Mennucci, B.; Hratchian, H.P.; Ortiz, J.V.; Izmaylov, A.F.; Sonnenberg, J.L.; Williams-Young, D.; Ding, F.; Lipparini, F.; Egidi, F.; Goings, J.; Peng, B.; Petrone, A.; Henderson, T.; Ranasinghe, D.; Zakrzewski, V.G.; Gao, J.; Rega, N.; Zheng, G.; Liang, W.; Hada, M.; Ehara, M.; Toyota, K.; Fukuda, R.; Hasegawa, J.; Ishida, M.; Nakajima, T.; Honda, Y.; Kitao, O.; Nakai, H.; Vreven, T.; Throssell, K.; Montgomery, J.A.Jr.; Peralta, J.E.; Ogliaro, F.; Bearpark, M.J.; Heyd, J.J.; Brothers, E.N.; Kudin, K.N.; Staroverov, V.N.; Keith, T.A.; Kobayashi, R.; Normand, J.; Raghavachari, K.; Rendell, A.P.; Burant, J.C.; Iyengar, S.S.; Tomasi, J.; Cossi, M.; Millam, J.M.; Klene, M.; Adamo, C.; Cammi, R.; Ochterski, J.W.; Martin, R.L.; Morokuma, K.; Farkas, O.; Foresman, J. B.;

Fox, D. J. Gaussian 16, Revision B.01, Gaussian, Inc., Wallingford CT, **2016**.

[3] Liu, Y.; Liu, F.; Qiao M.M.; Guo, L.; Chen, M.H.; Peng, C.; Xiong, L. Curcumanes A and B, two bicyclic sesquiterpenoids with significant vasorelaxant activity from *Curcuma longa*. *Org. Lett.* **2019**, *21*, 1197-1201.

[4] Bruhn, T.; Schaumlöffel, A.; Hemberger, Y.; Bringmann, G. Spec Dis, version 1.71, University of Würzburg, Germany, **2017**.

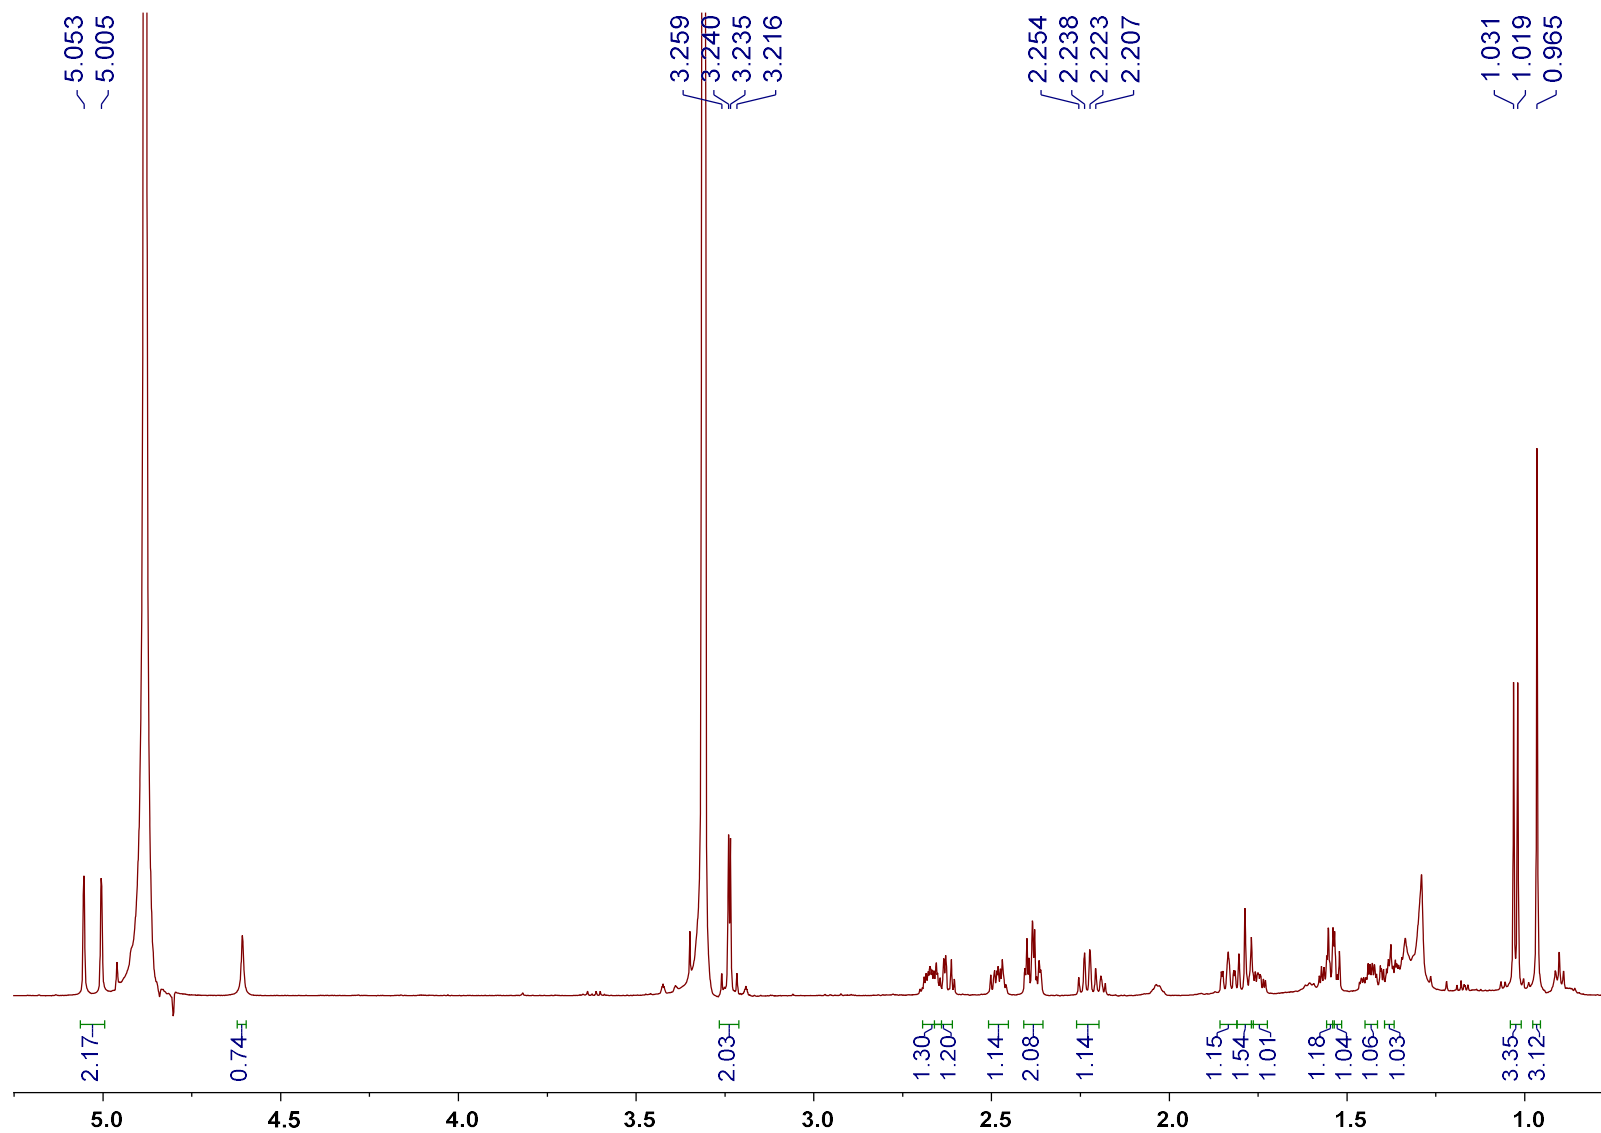

**Figure S6.** The  $^1\text{H}$  NMR spectrum of compound **1** in  $\text{CD}_3\text{OD}$

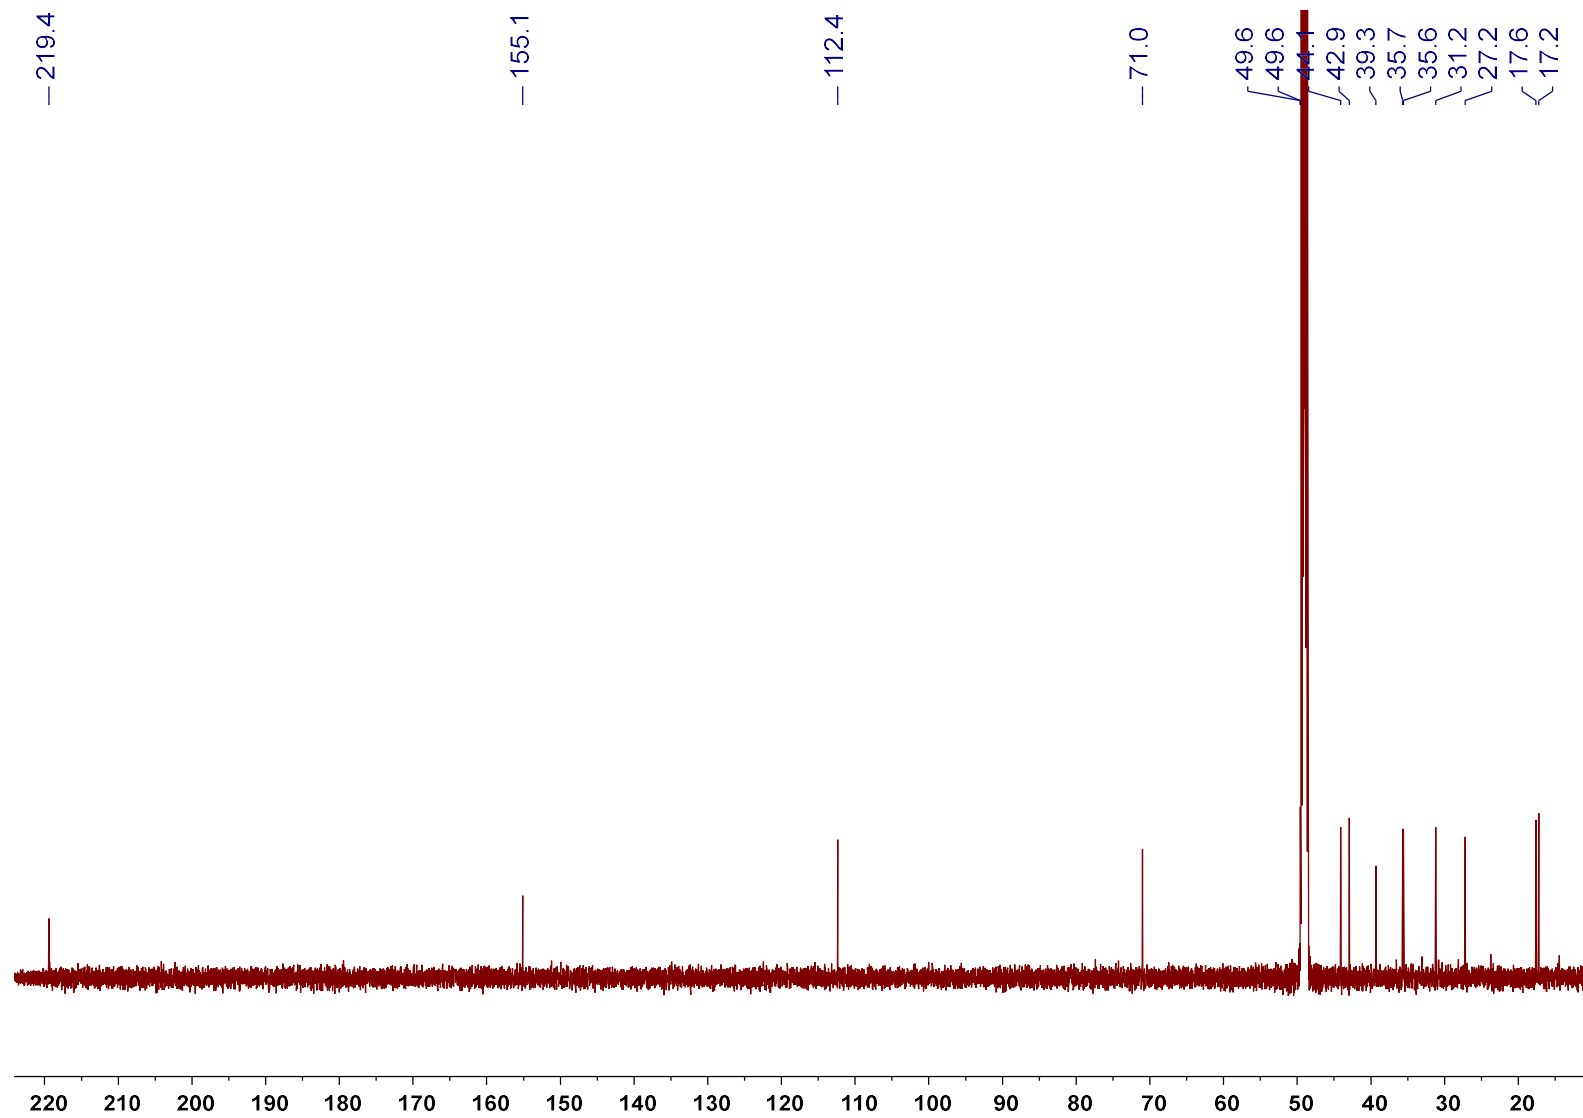

**Figure S7.** The  $^{13}\text{C}$  NMR spectrum of compound **1** in  $\text{CD}_3\text{OD}$

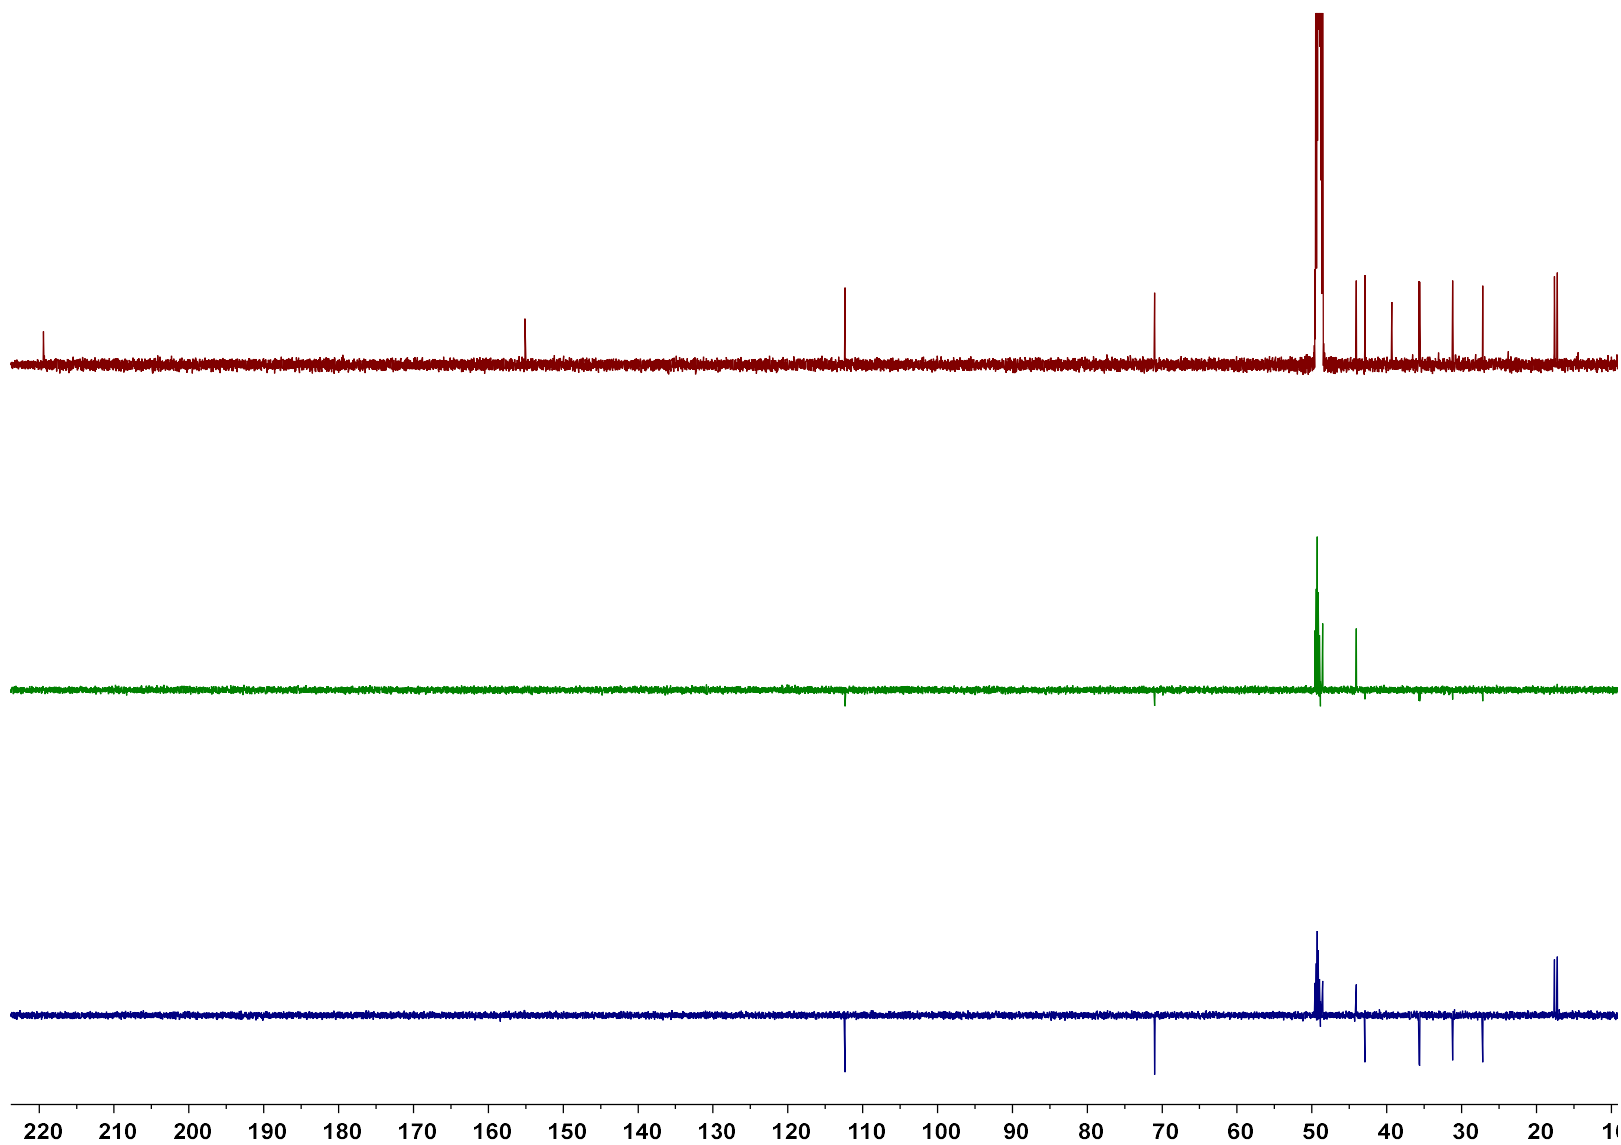

**Figure S8.** The DEPT spectrum of compound **1** in CD<sub>3</sub>OD

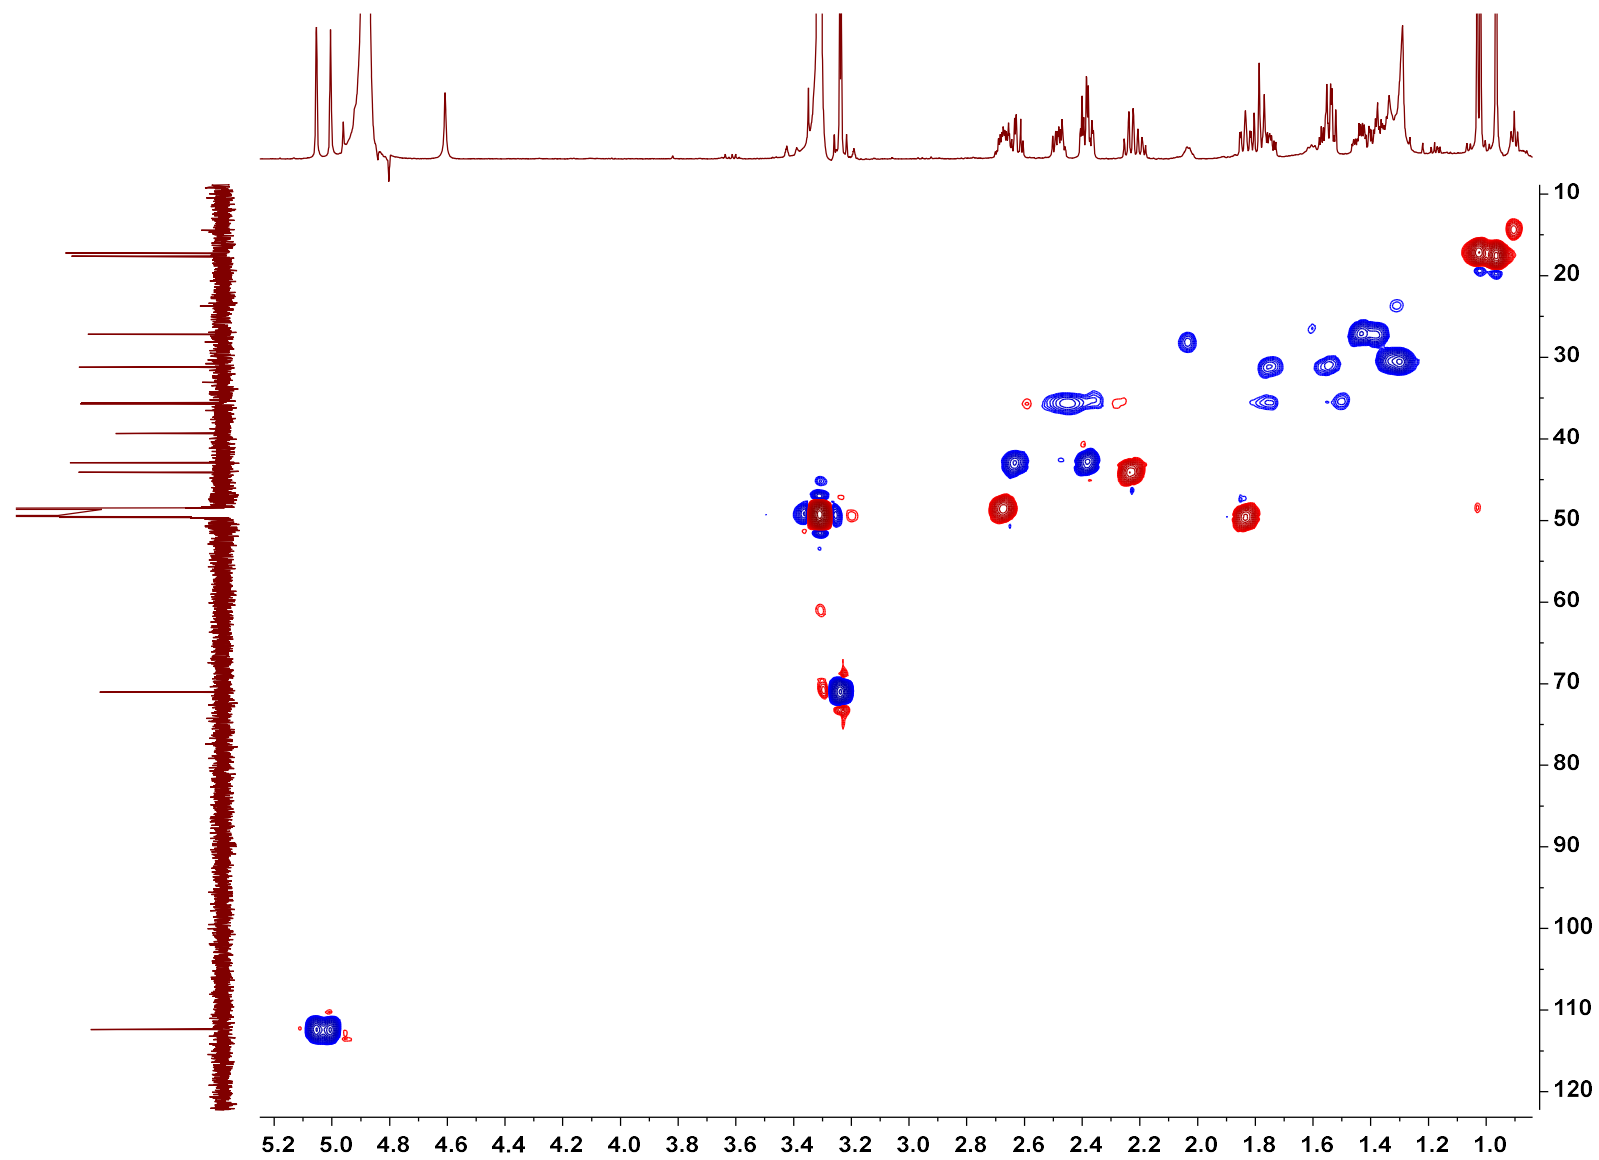

**Figure S9.** The HSQC spectrum of compound **1** in CD<sub>3</sub>OD

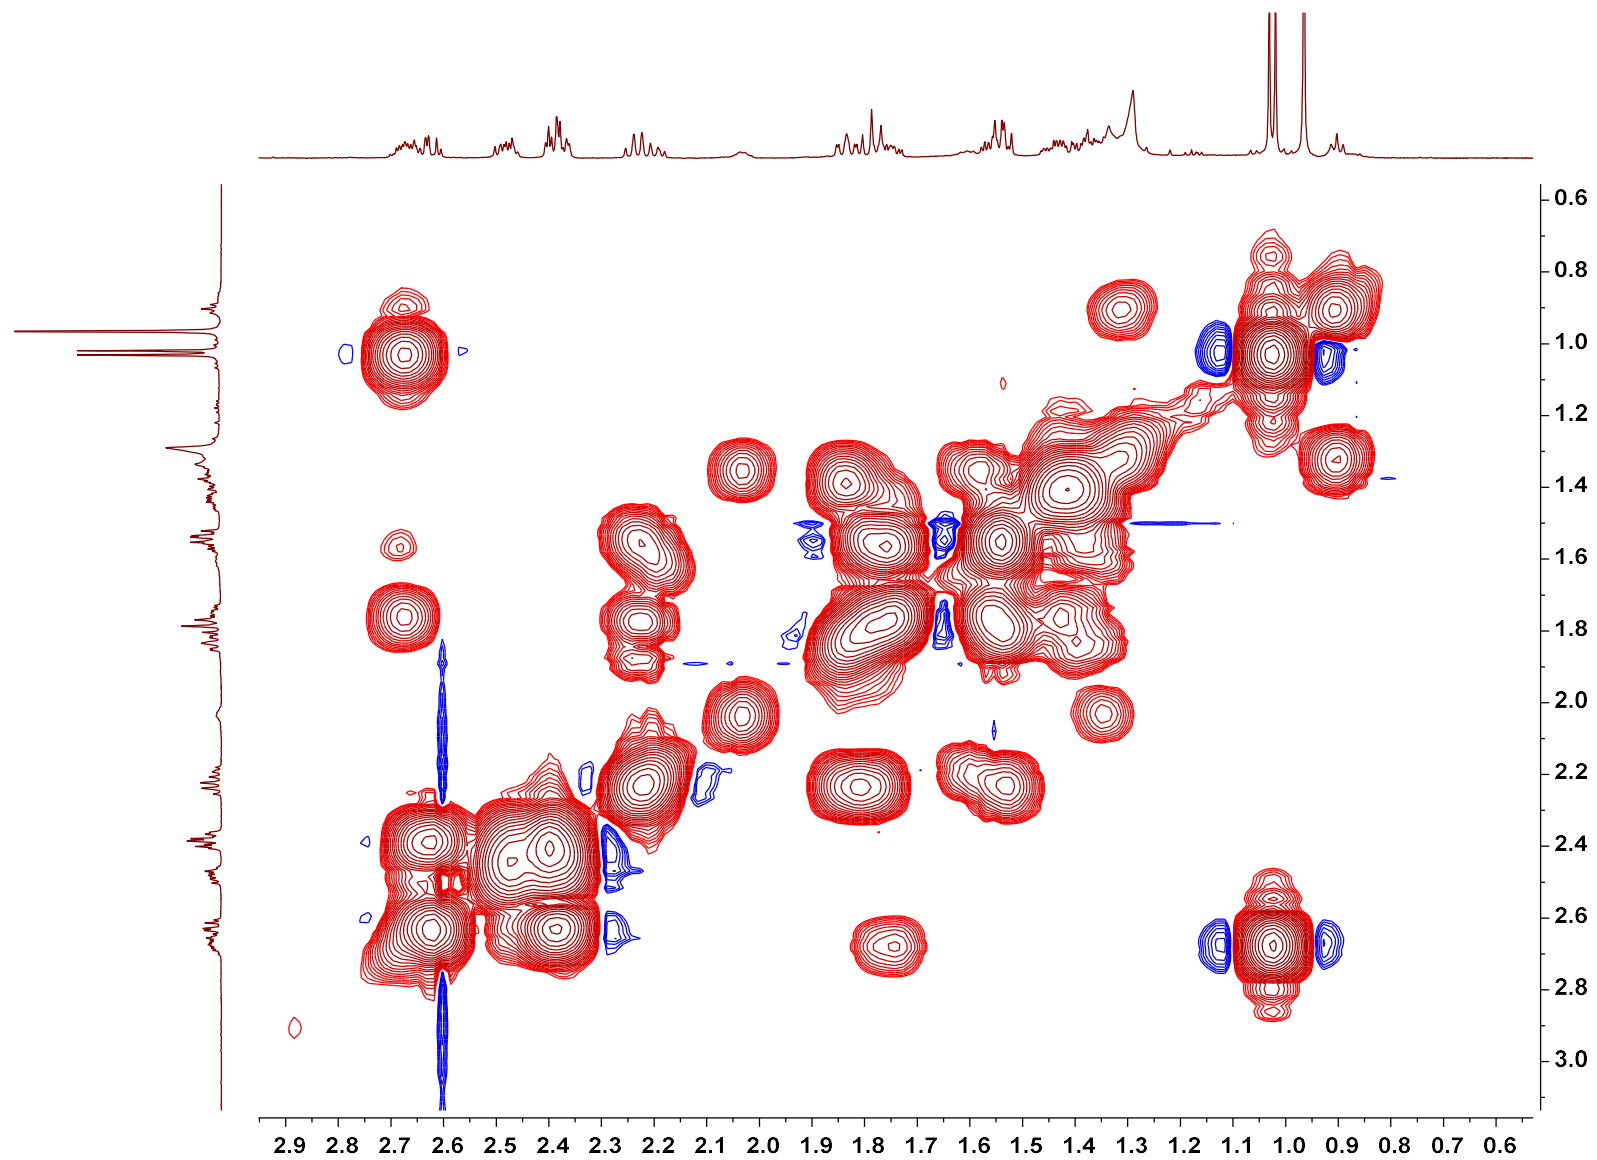

**Figure S10.** The  $^1\text{H}$ - $^1\text{H}$  COSY spectrum of compound **1** in  $\text{CD}_3\text{OD}$



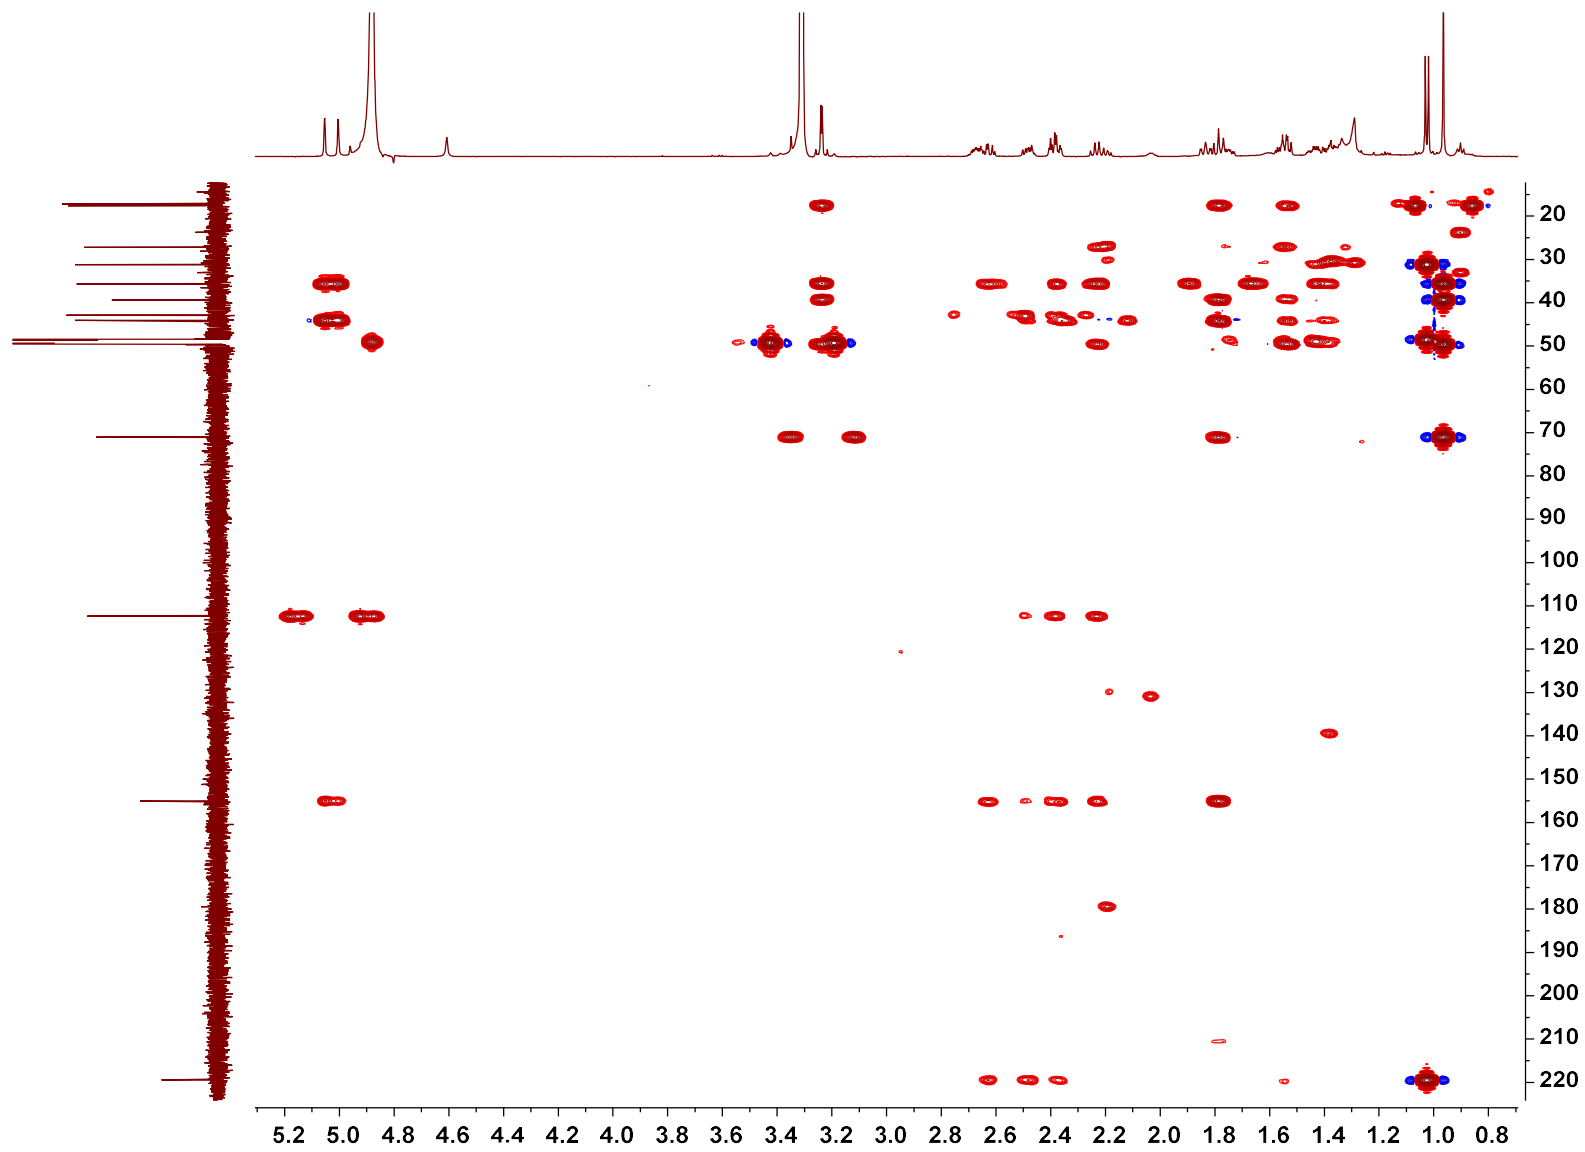

Figure S11. The HMBC spectrum of compound **1** in CD<sub>3</sub>OD

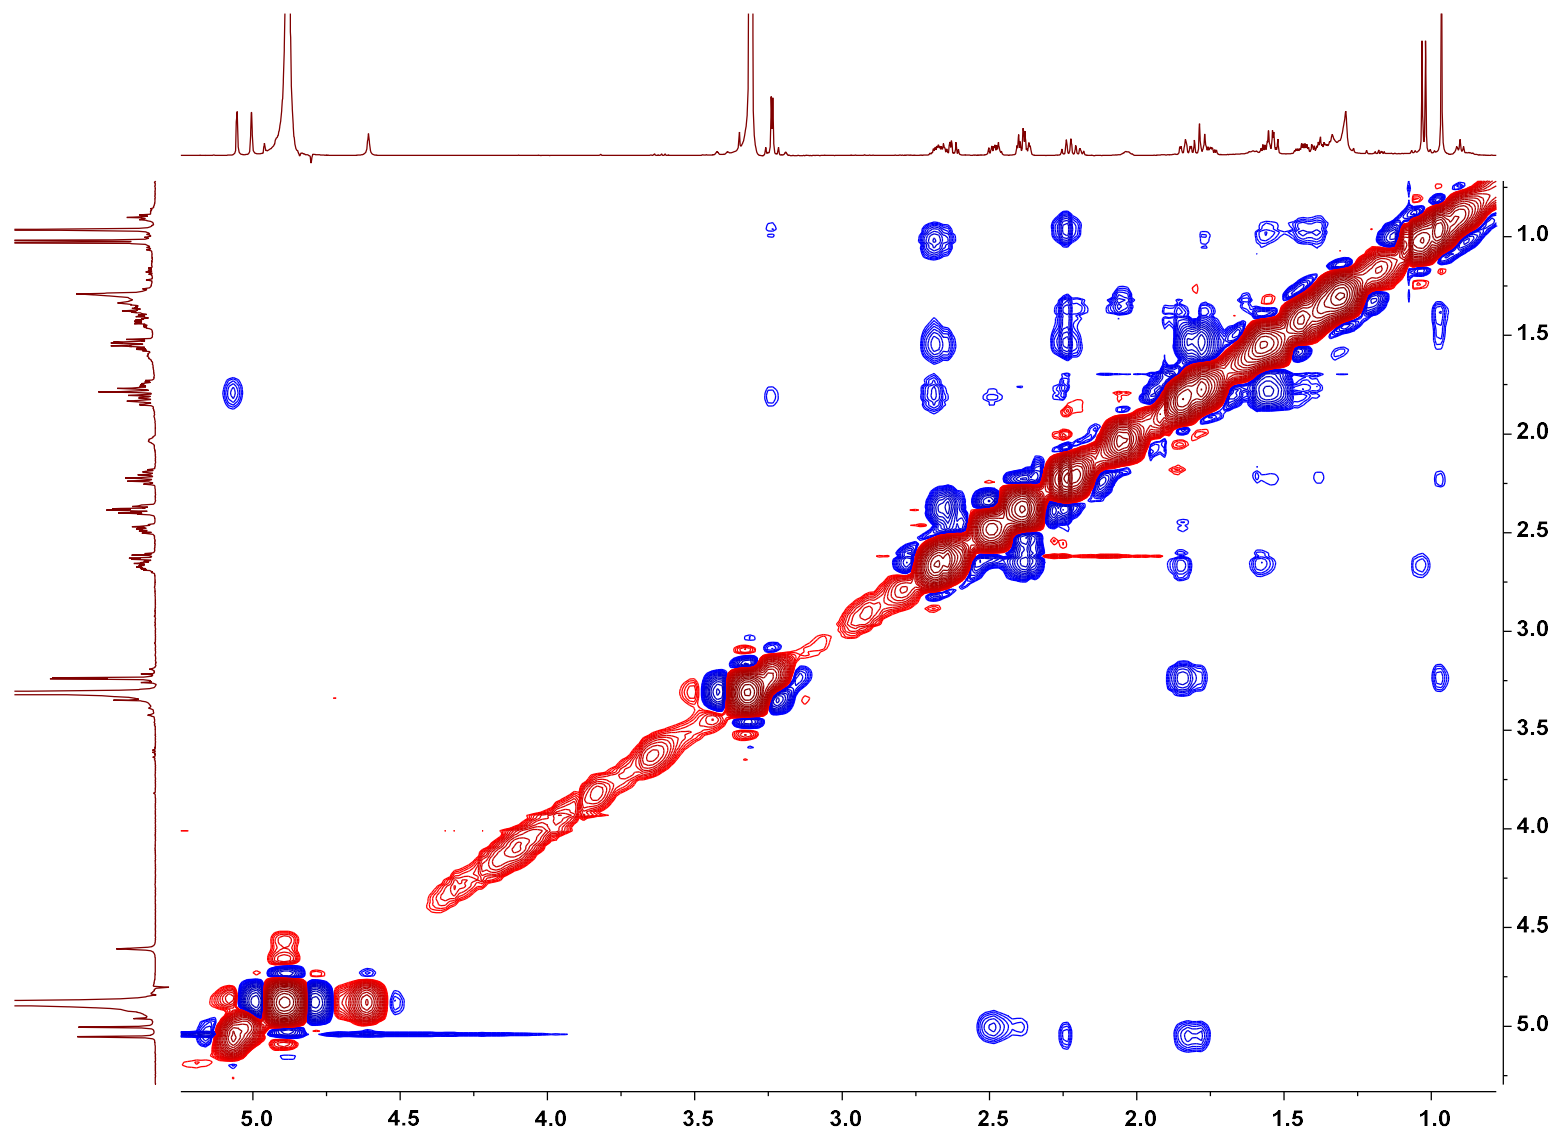

**Figure S12.** The NOESY spectrum of compound **1** in CD<sub>3</sub>OD

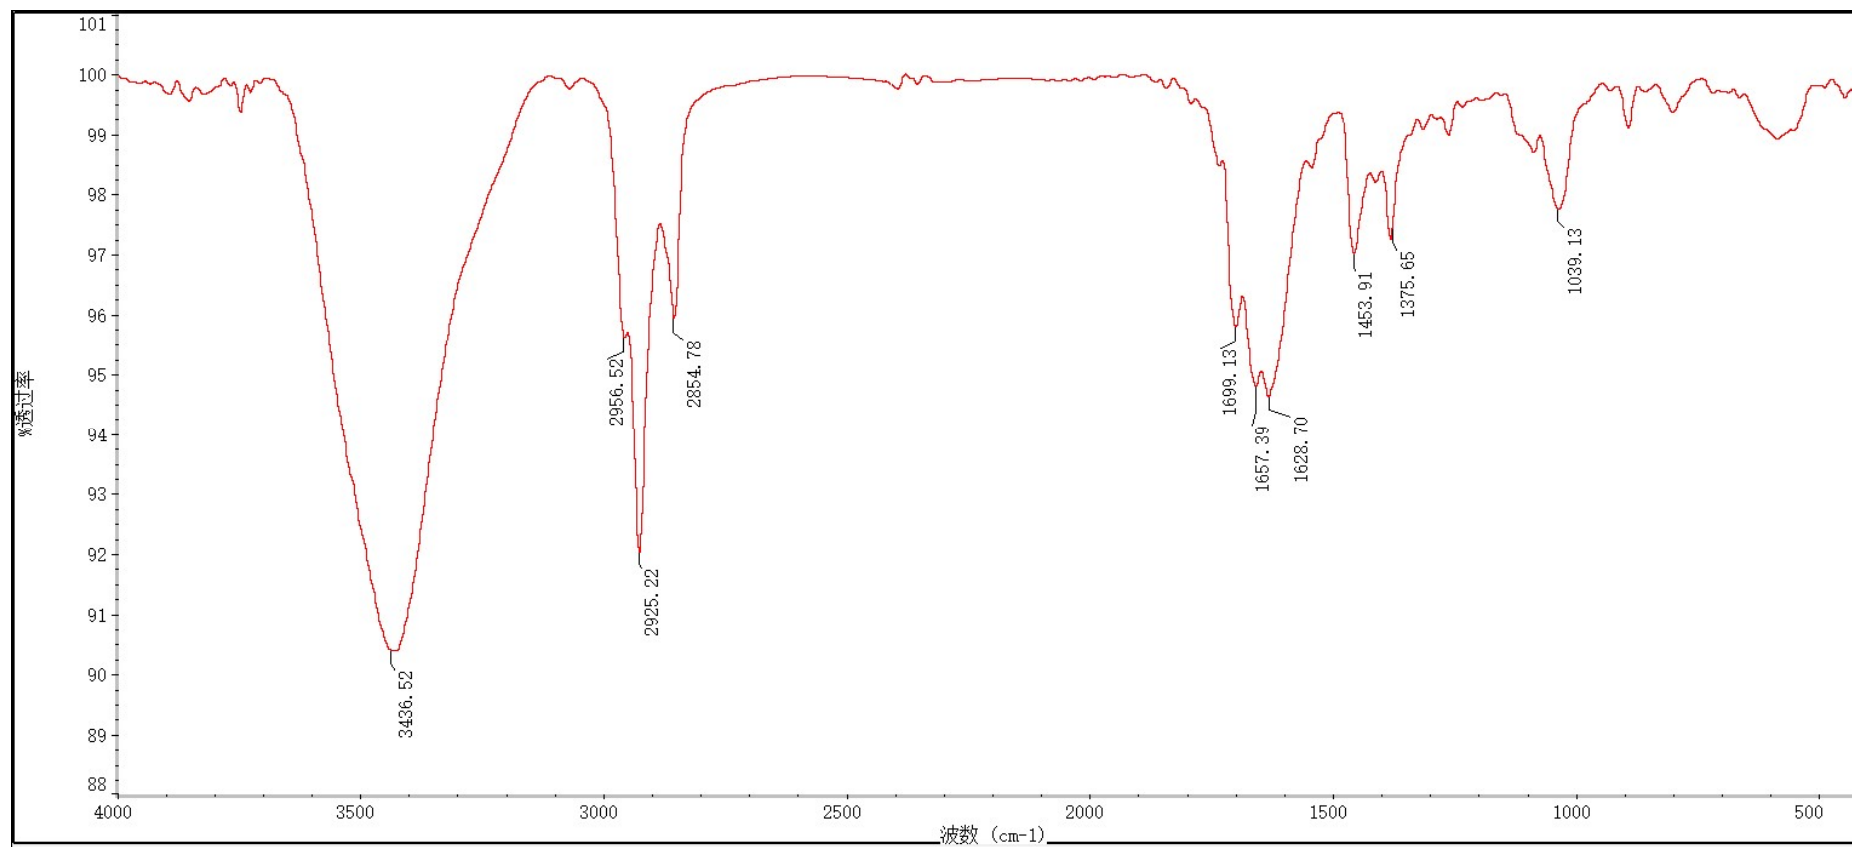

**Figure S13.** The IR spectrum of compound **1**

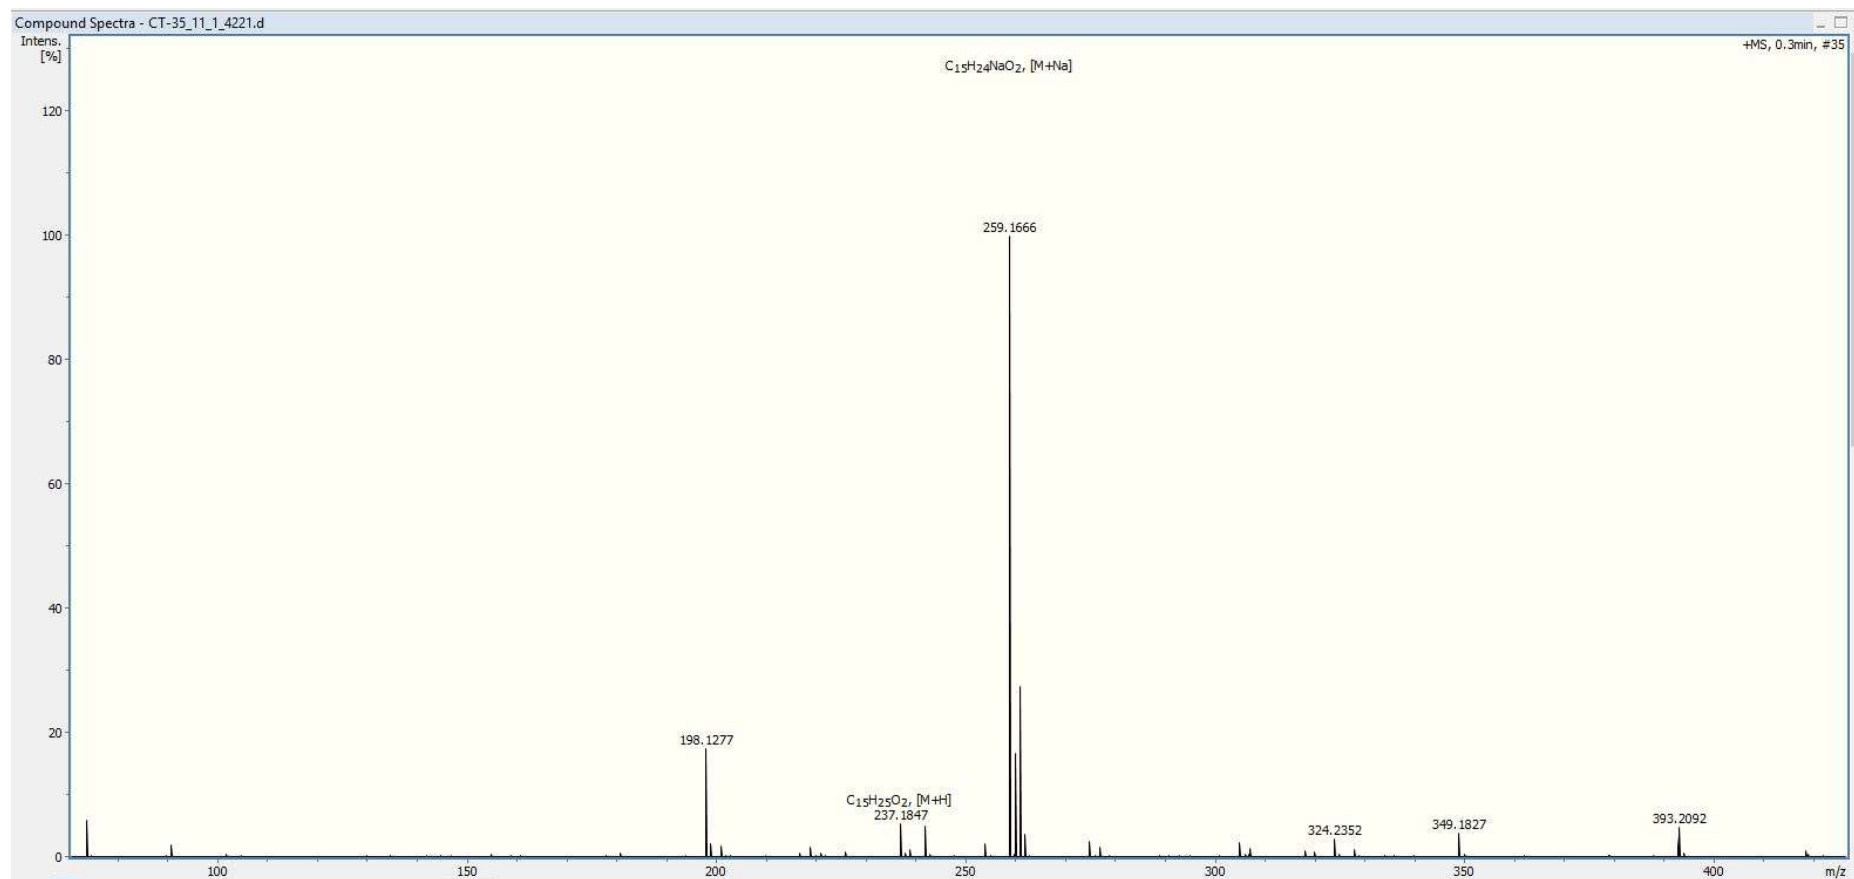

**Figure S14.** The (+)-HR-ESI-MS spectroscopic data of compound **1**

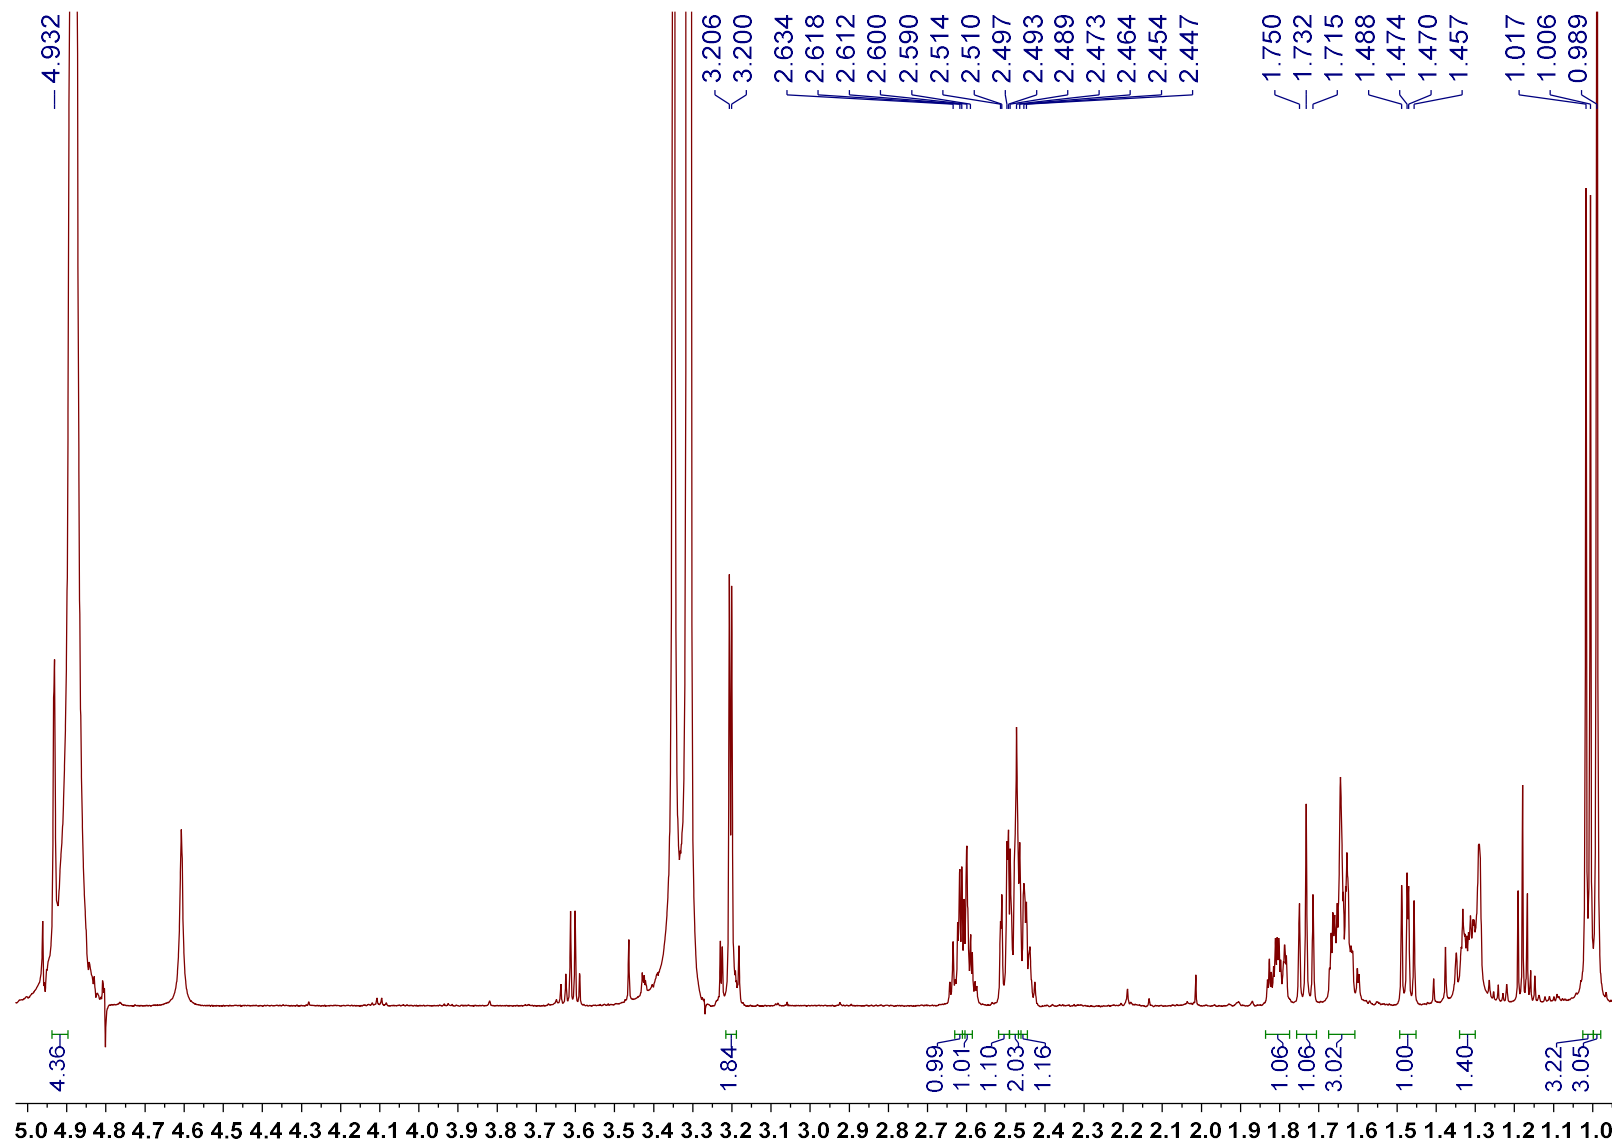

**Figure S15.** The  $^1\text{H}$  NMR spectrum of compound **2** in  $\text{CD}_3\text{OD}$

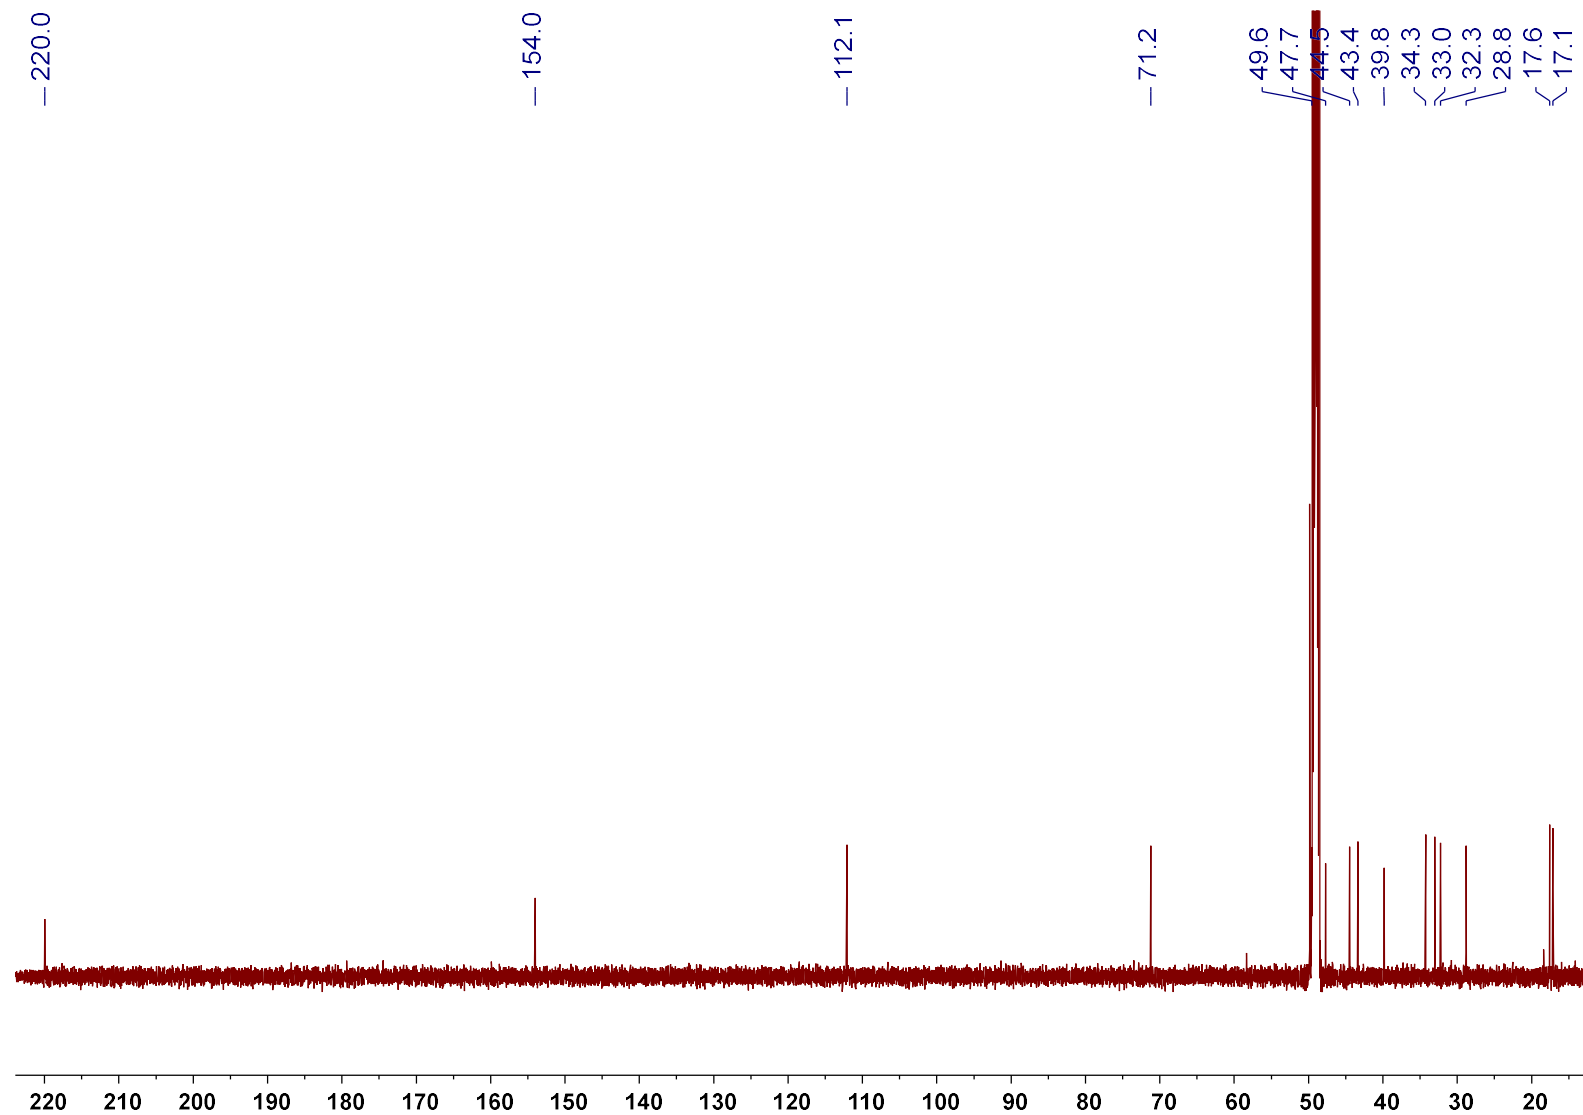

**Figure S16.** The <sup>13</sup>C NMR spectrum of compound **2** in CD<sub>3</sub>OD

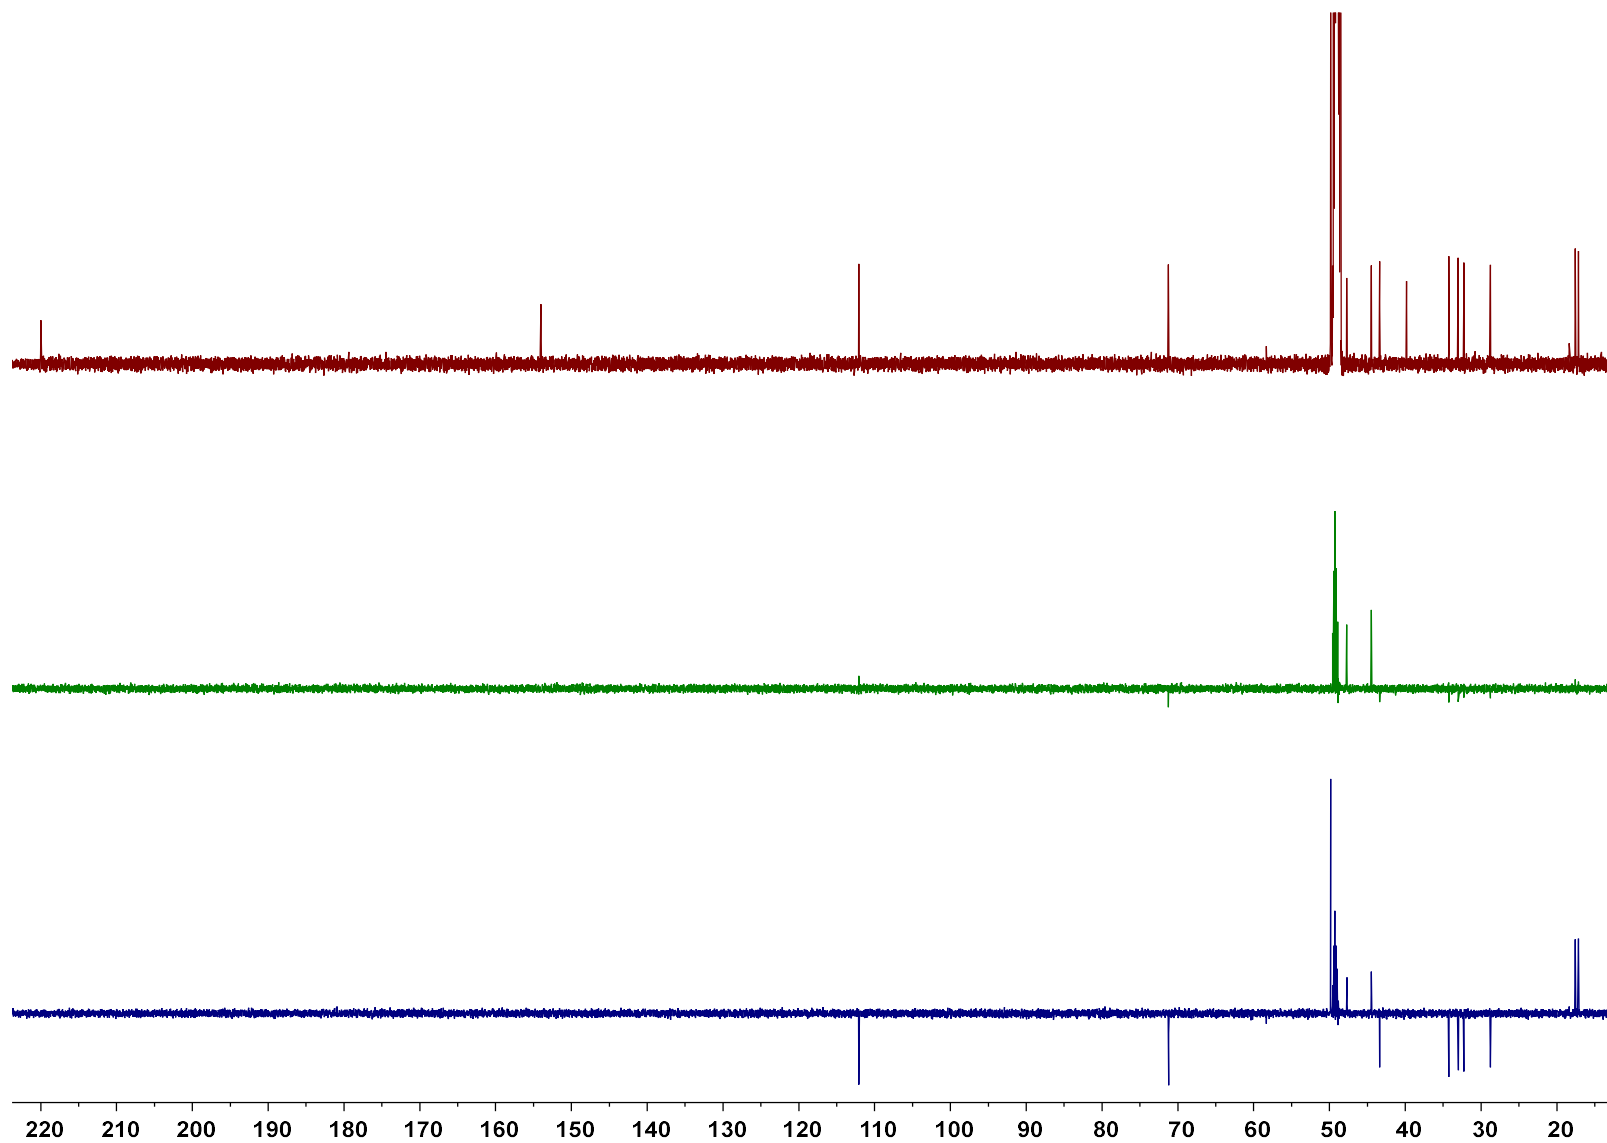

**Figure S17.** The DEPT spectrum of compound **2** in CD<sub>3</sub>OD

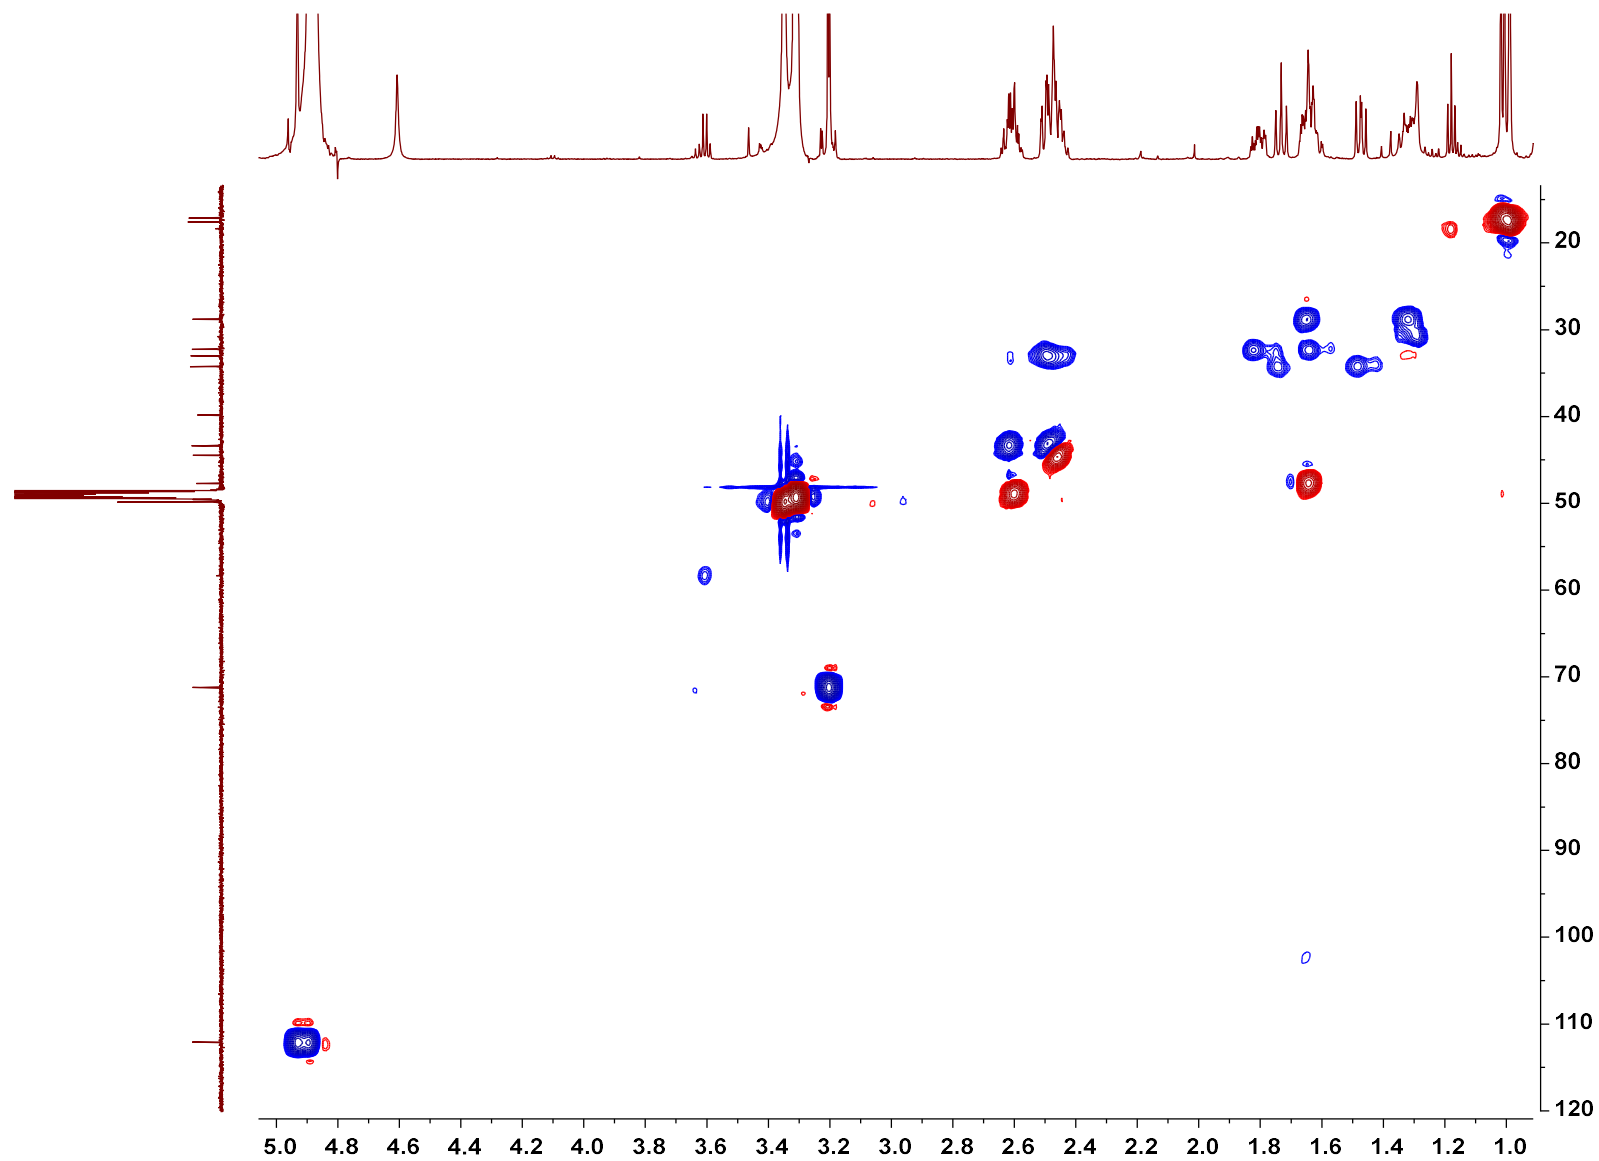

**Figure S18.** The HSQC spectrum of compound **2** in CD<sub>3</sub>OD



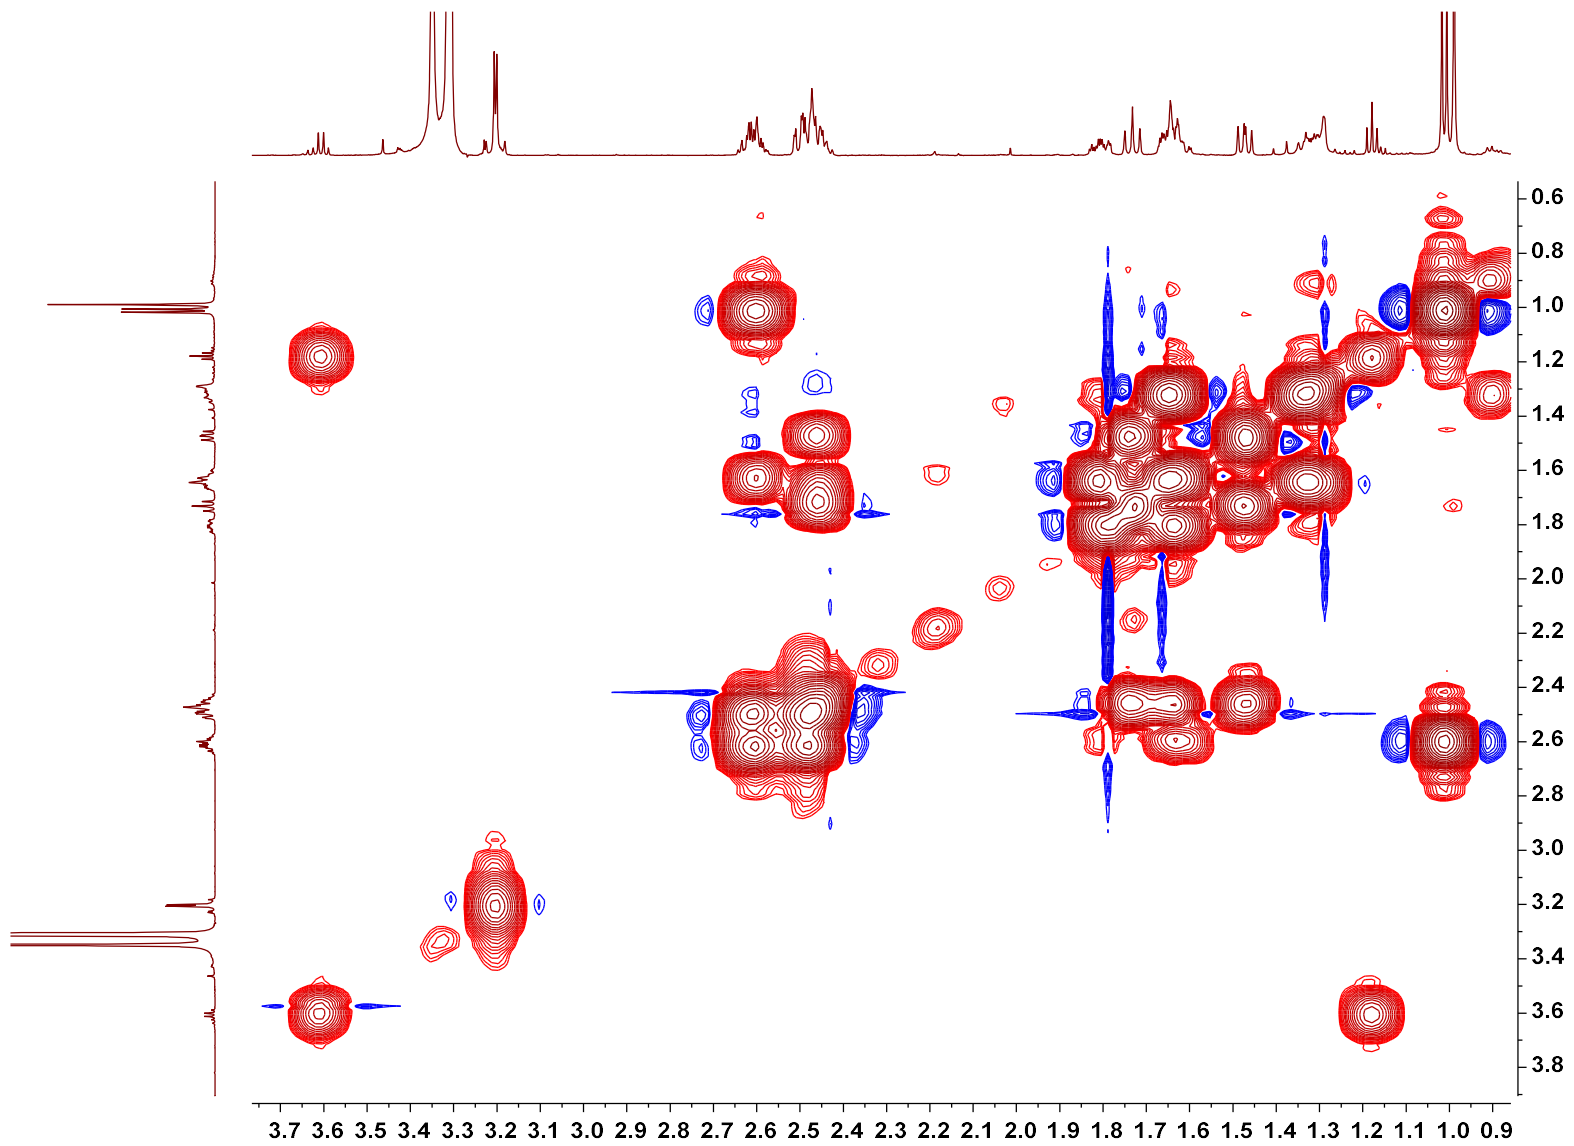

**Figure S19.** The  $^1\text{H}$ - $^1\text{H}$  COSY spectrum of compound **2** in  $\text{CD}_3\text{OD}$

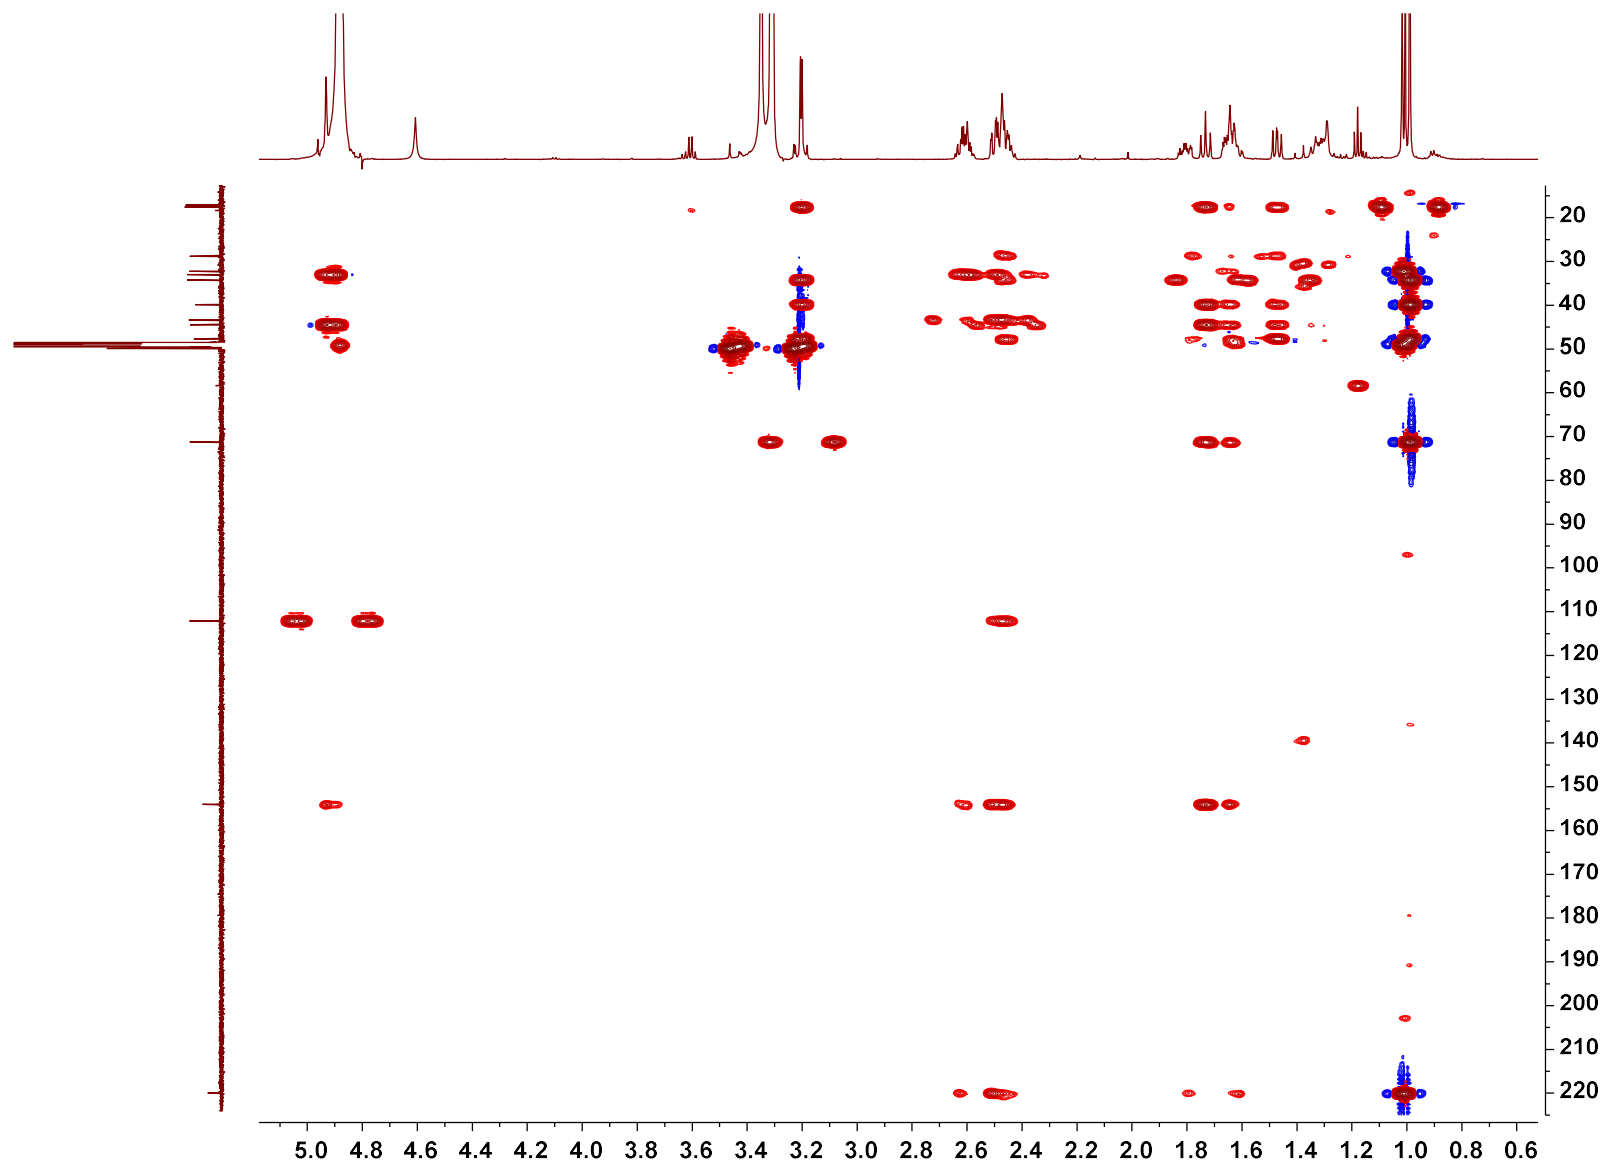

**Figure S20.** The HMBC spectrum of compound **2** in CD<sub>3</sub>OD

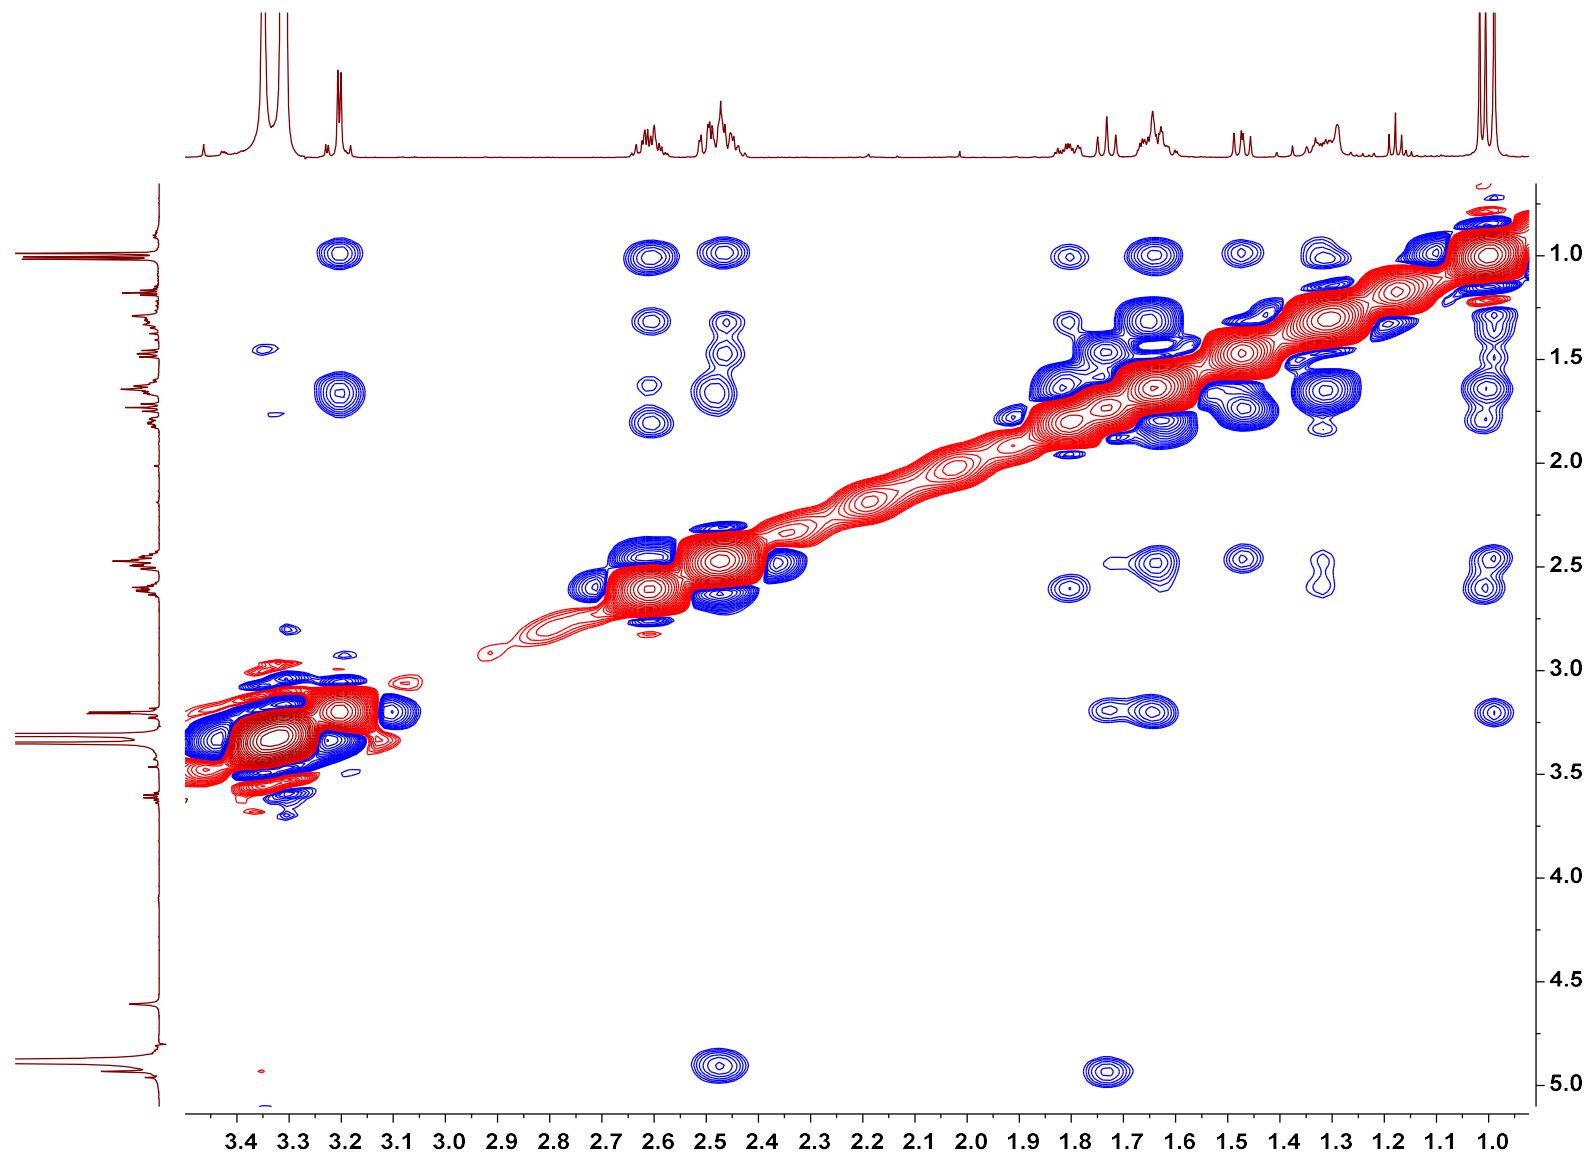

**Figure S21.** The NOESY spectrum of compound **2** in CD<sub>3</sub>OD

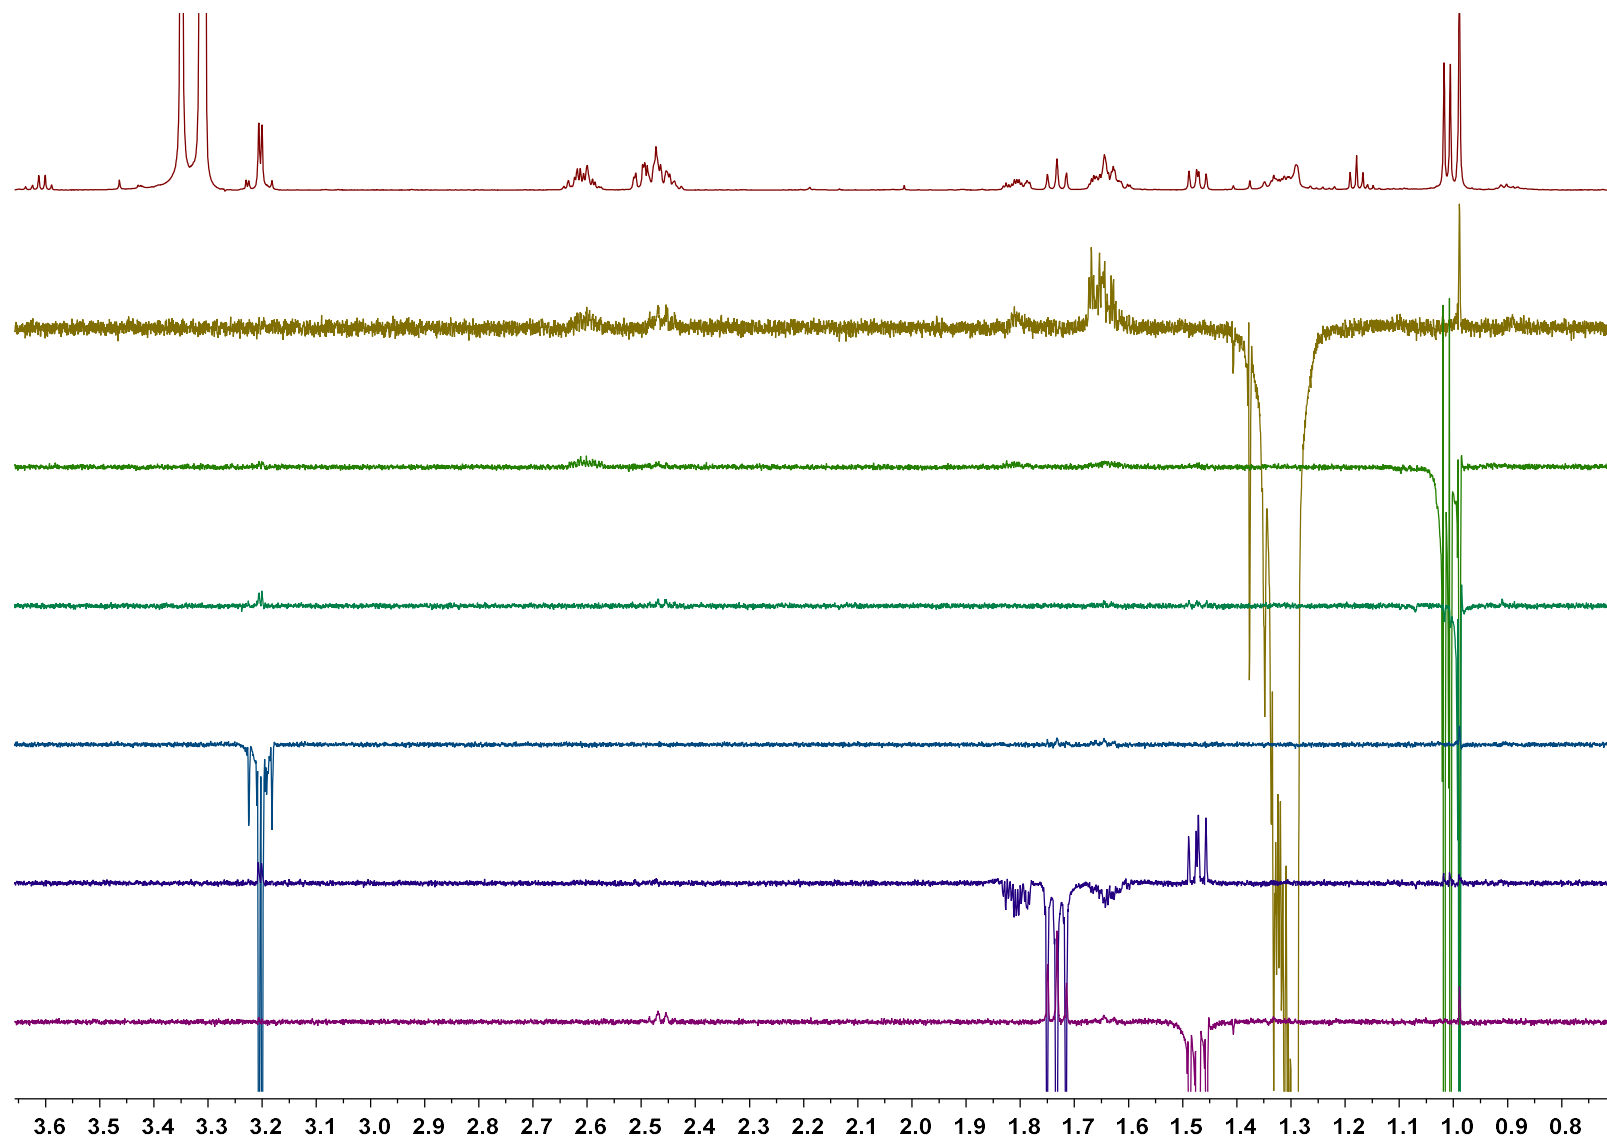

**Figure S22.** The 1D NOE spectrum of compound **2** in CD<sub>3</sub>OD

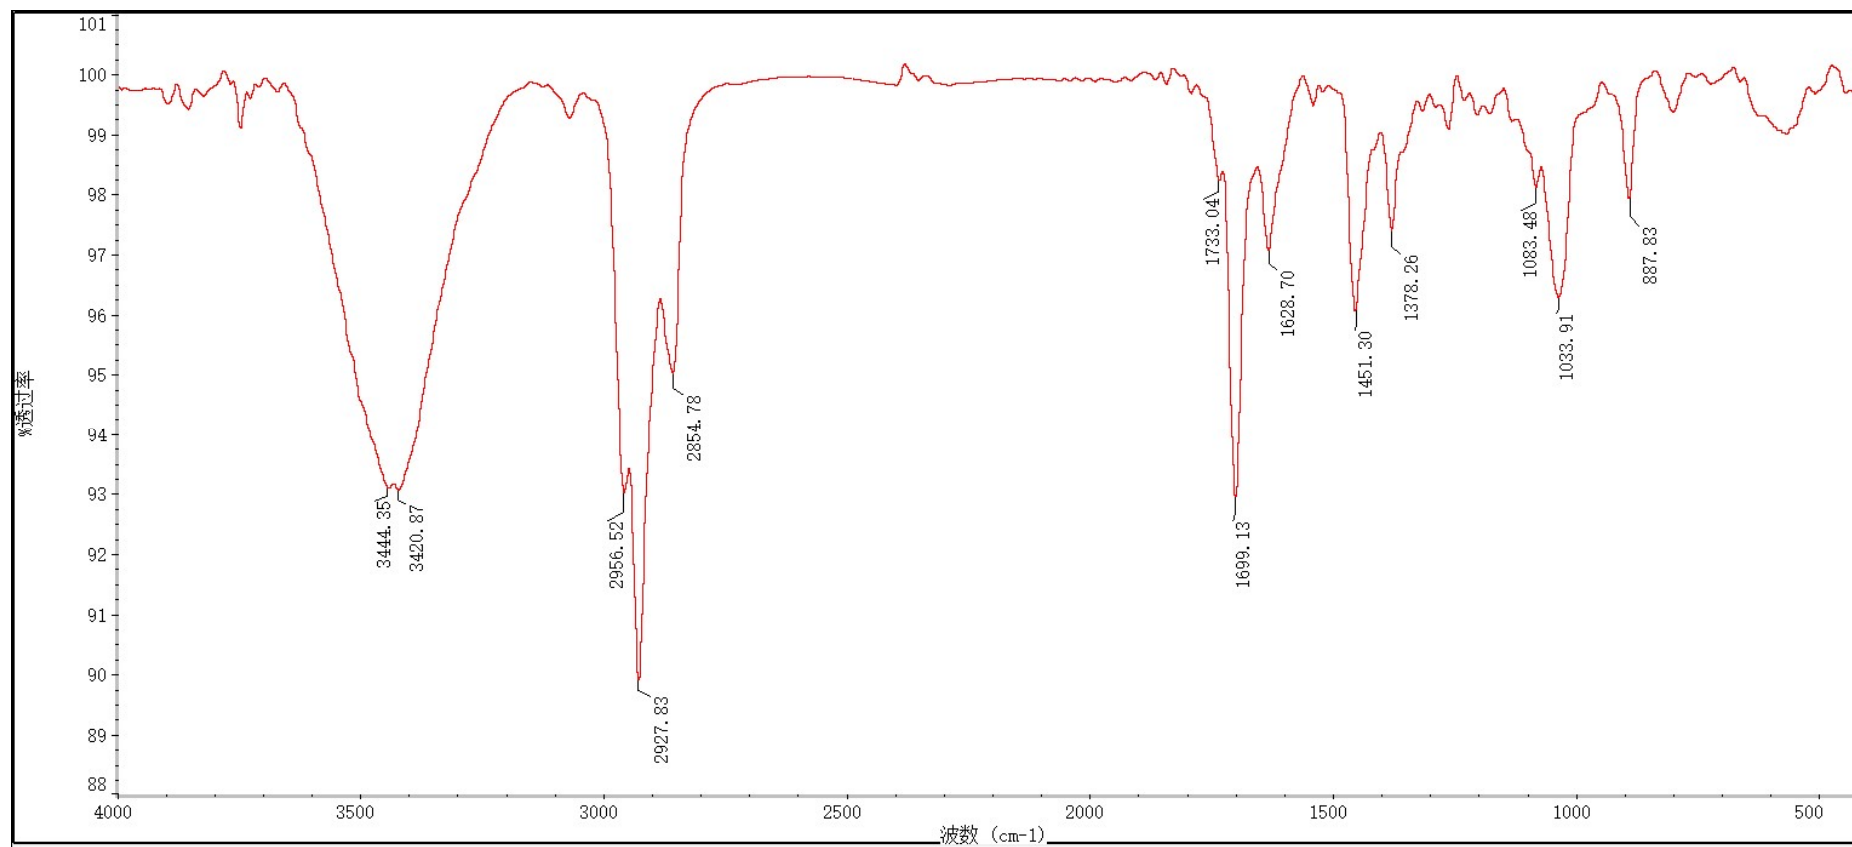

**Figure S23.** The IR spectrum of compound **2**

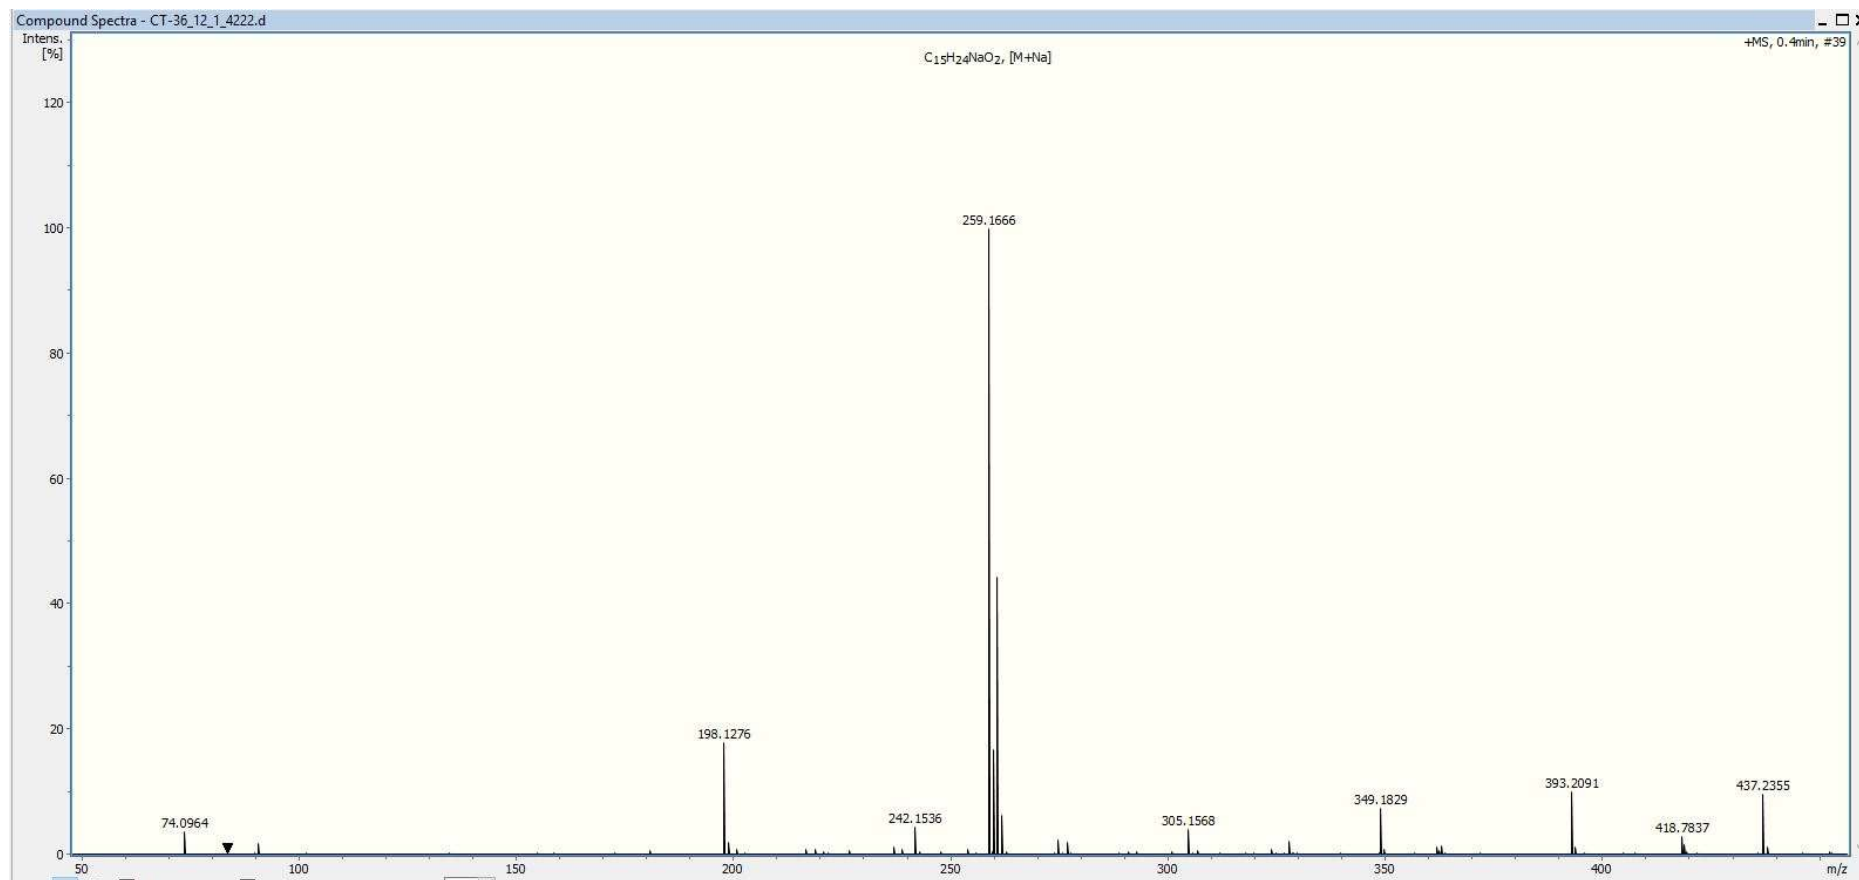

**Figure S24.** The (+)-HR-ESI-MS spectroscopic data of compound **2**

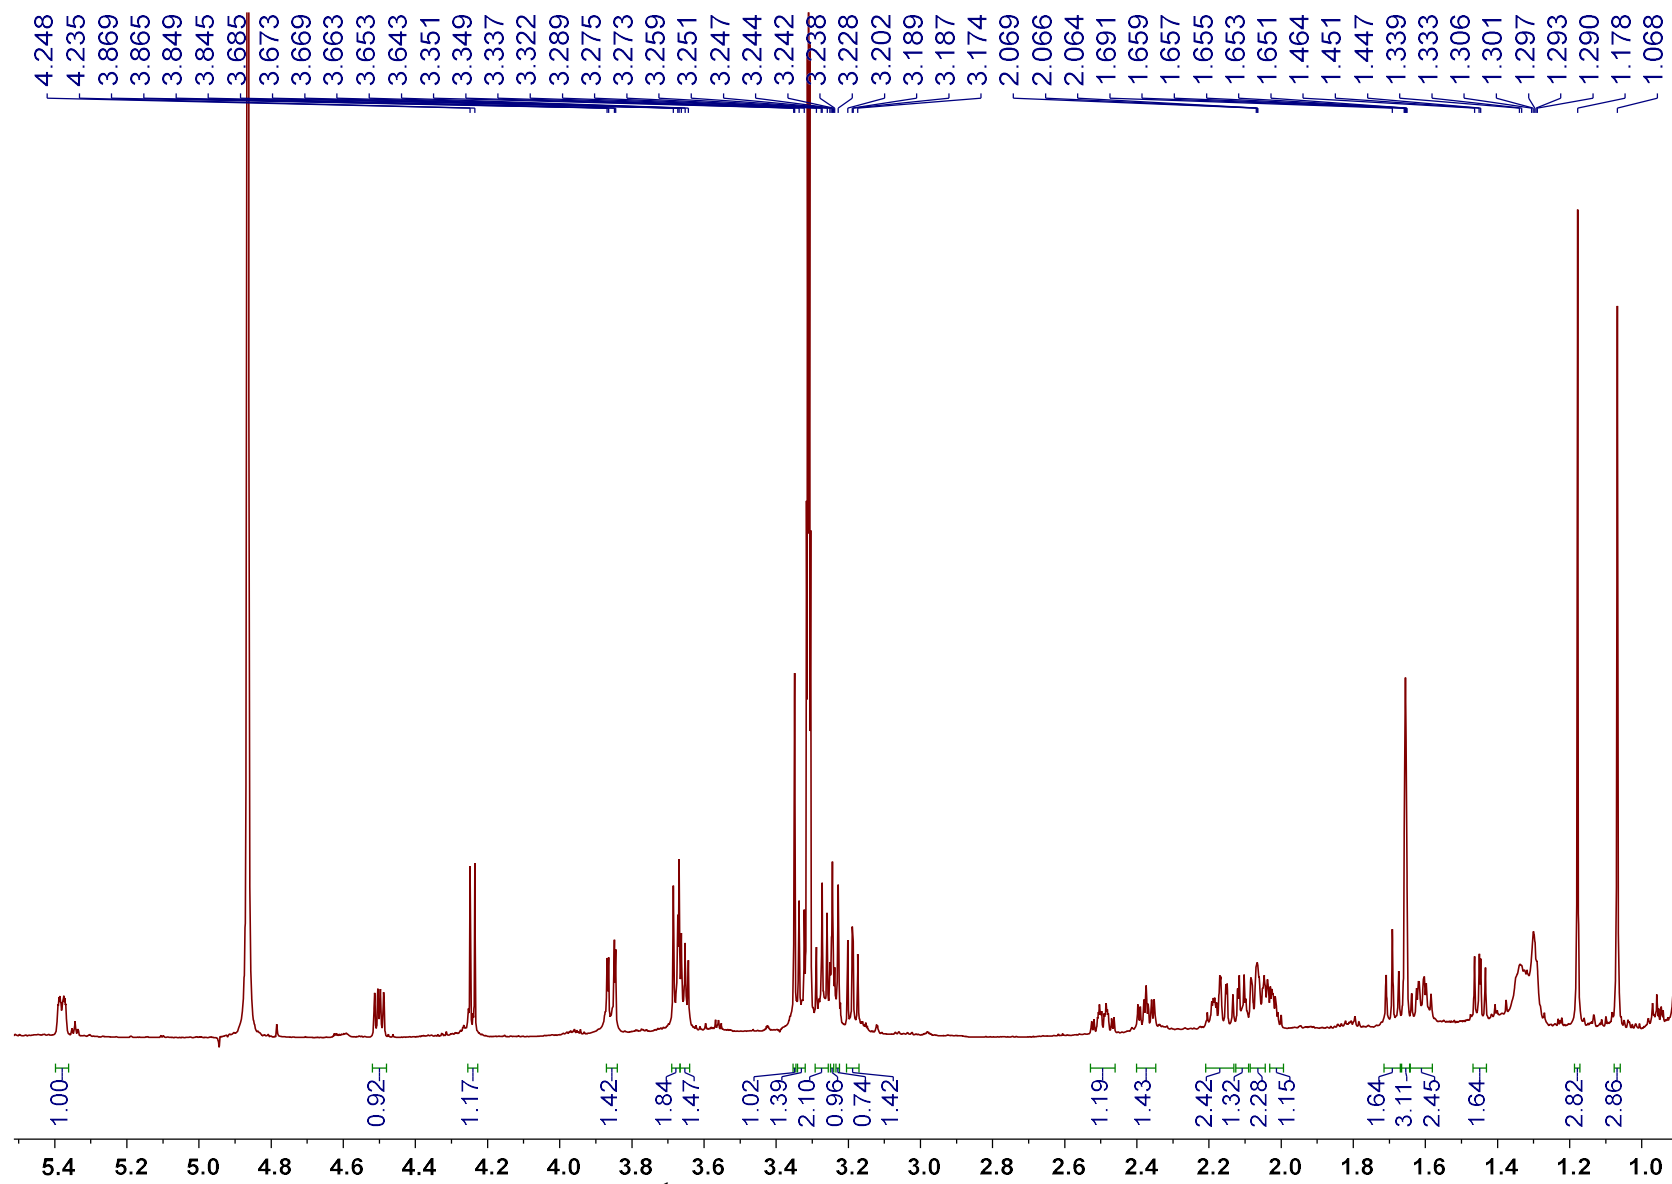

Figure S25. The  $^1\text{H}$  NMR spectrum of compound **3** in  $\text{CD}_3\text{OD}$

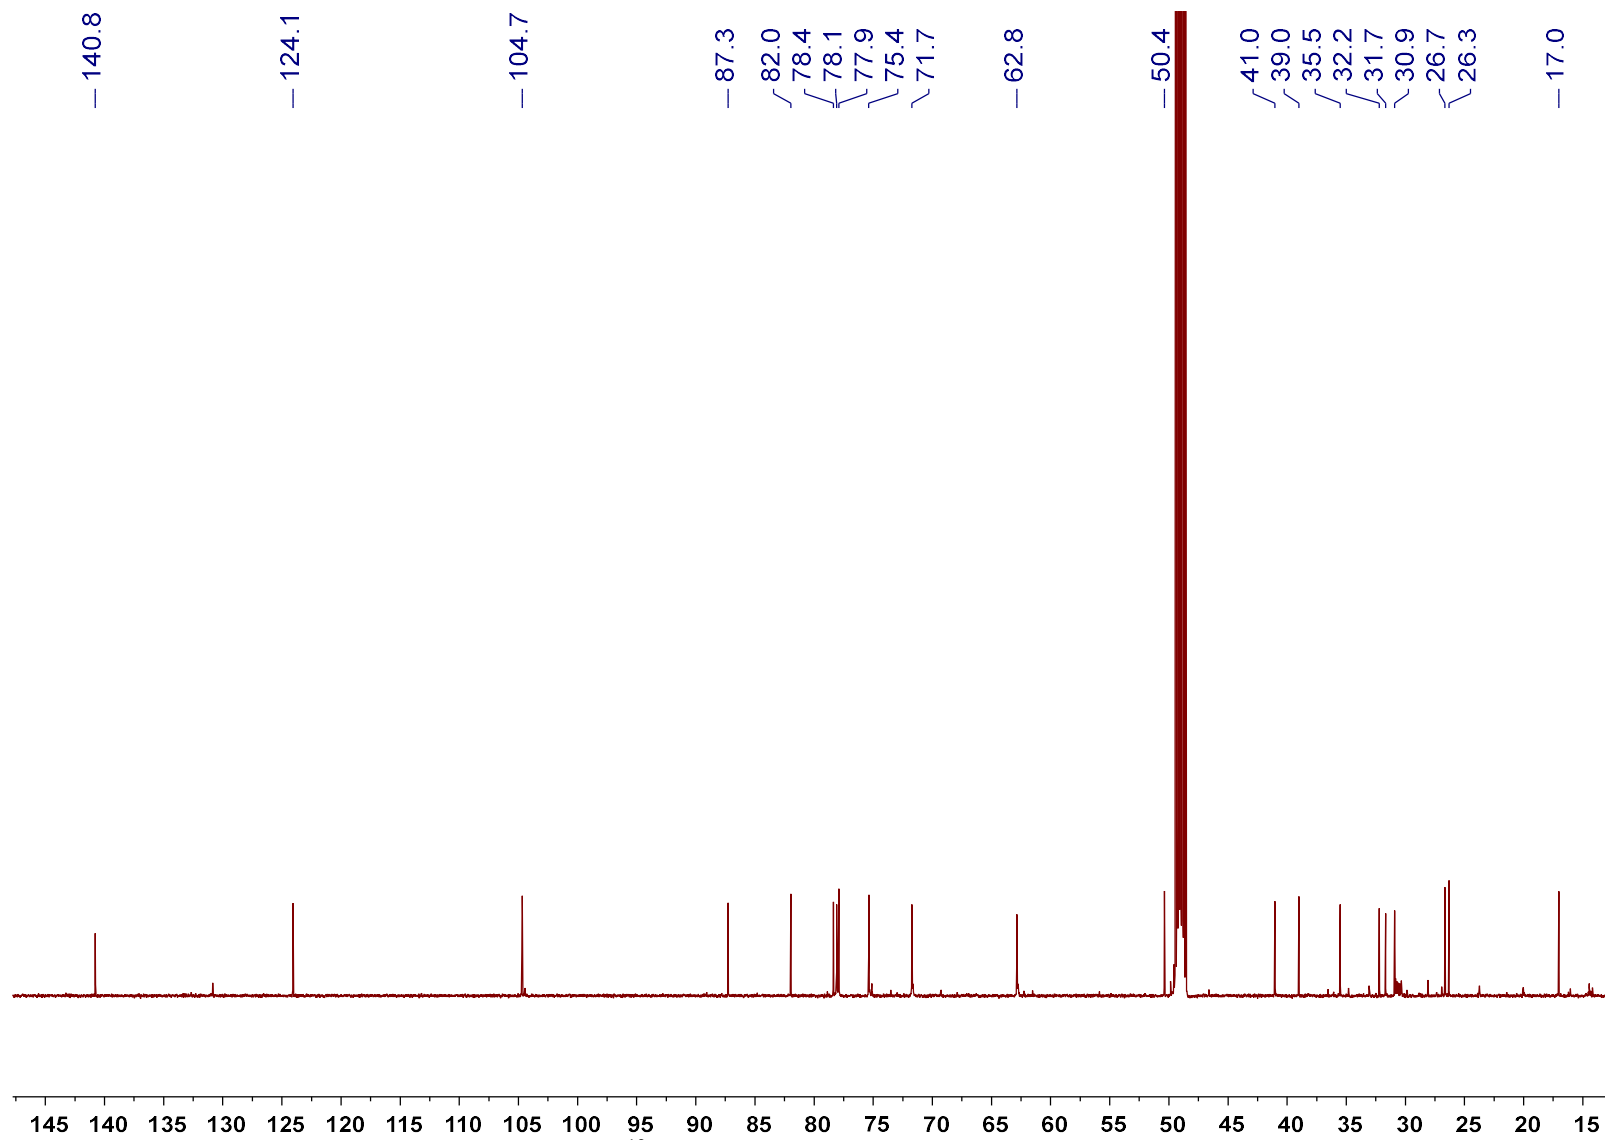

Figure S26. The  $^{13}\text{C}$  NMR spectrum of compound **3** in  $\text{CD}_3\text{OD}$



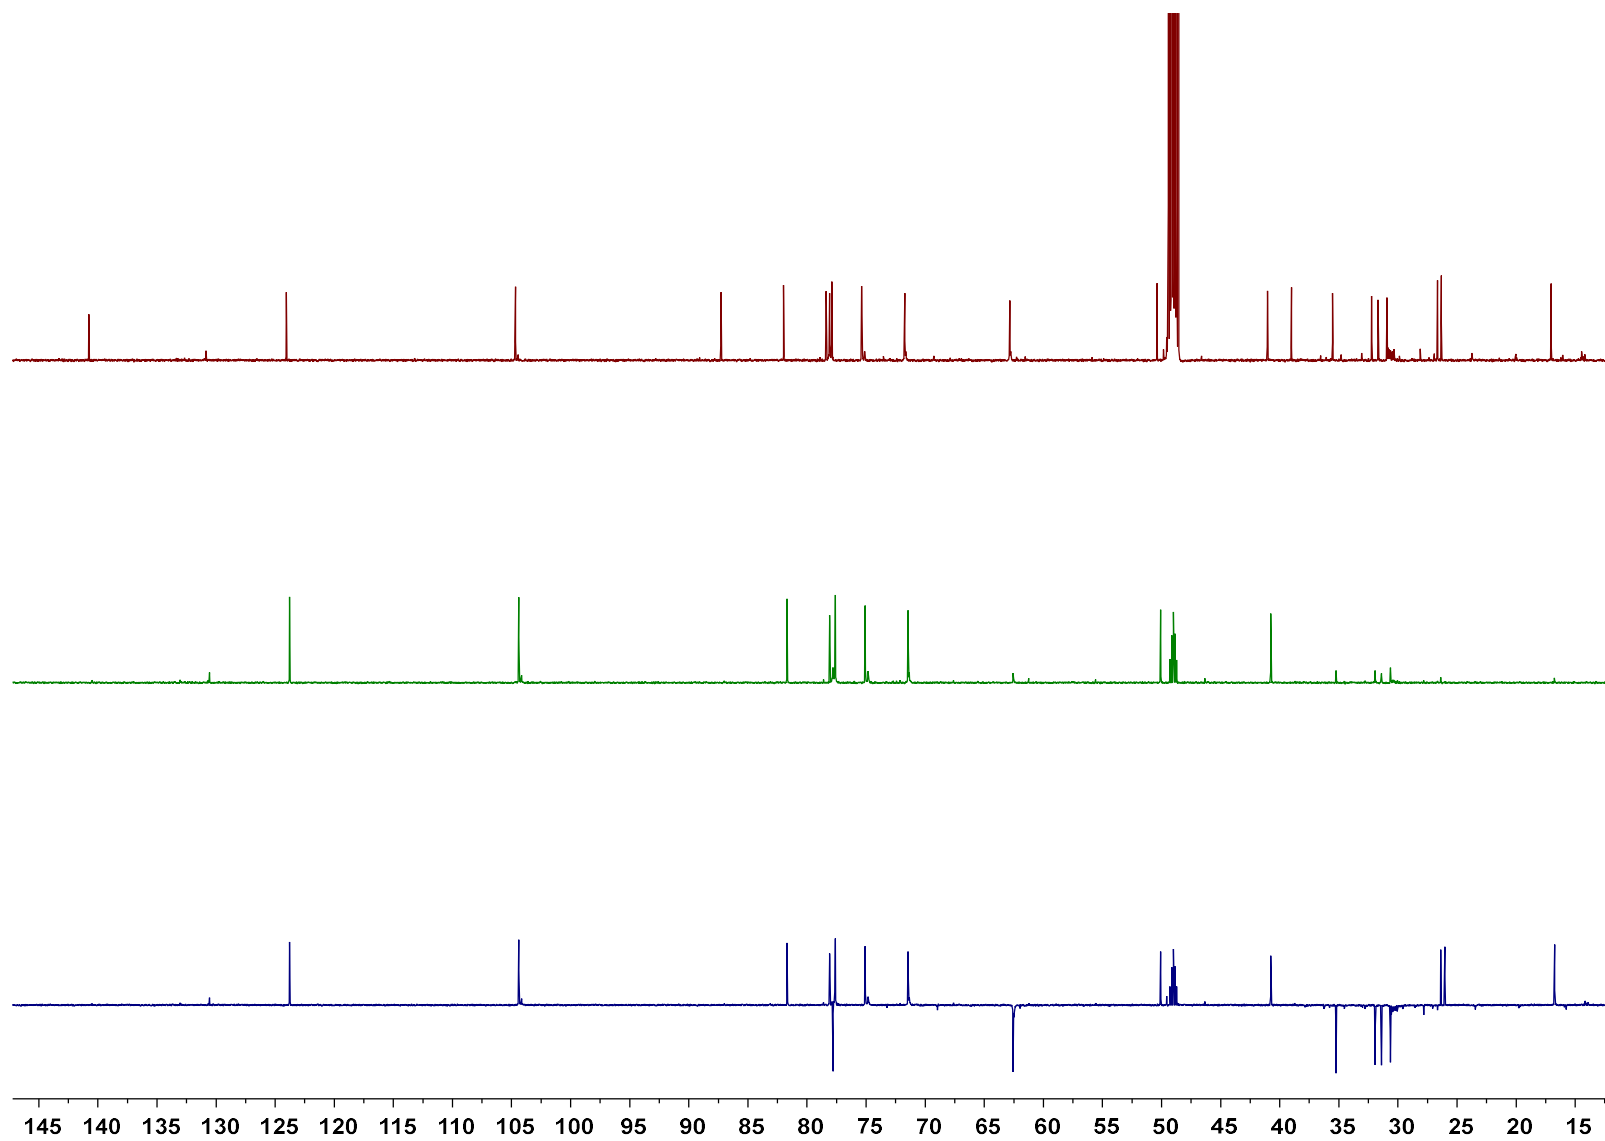

**Figure S27.** The DEPT spectrum of compound **3** in CD<sub>3</sub>OD

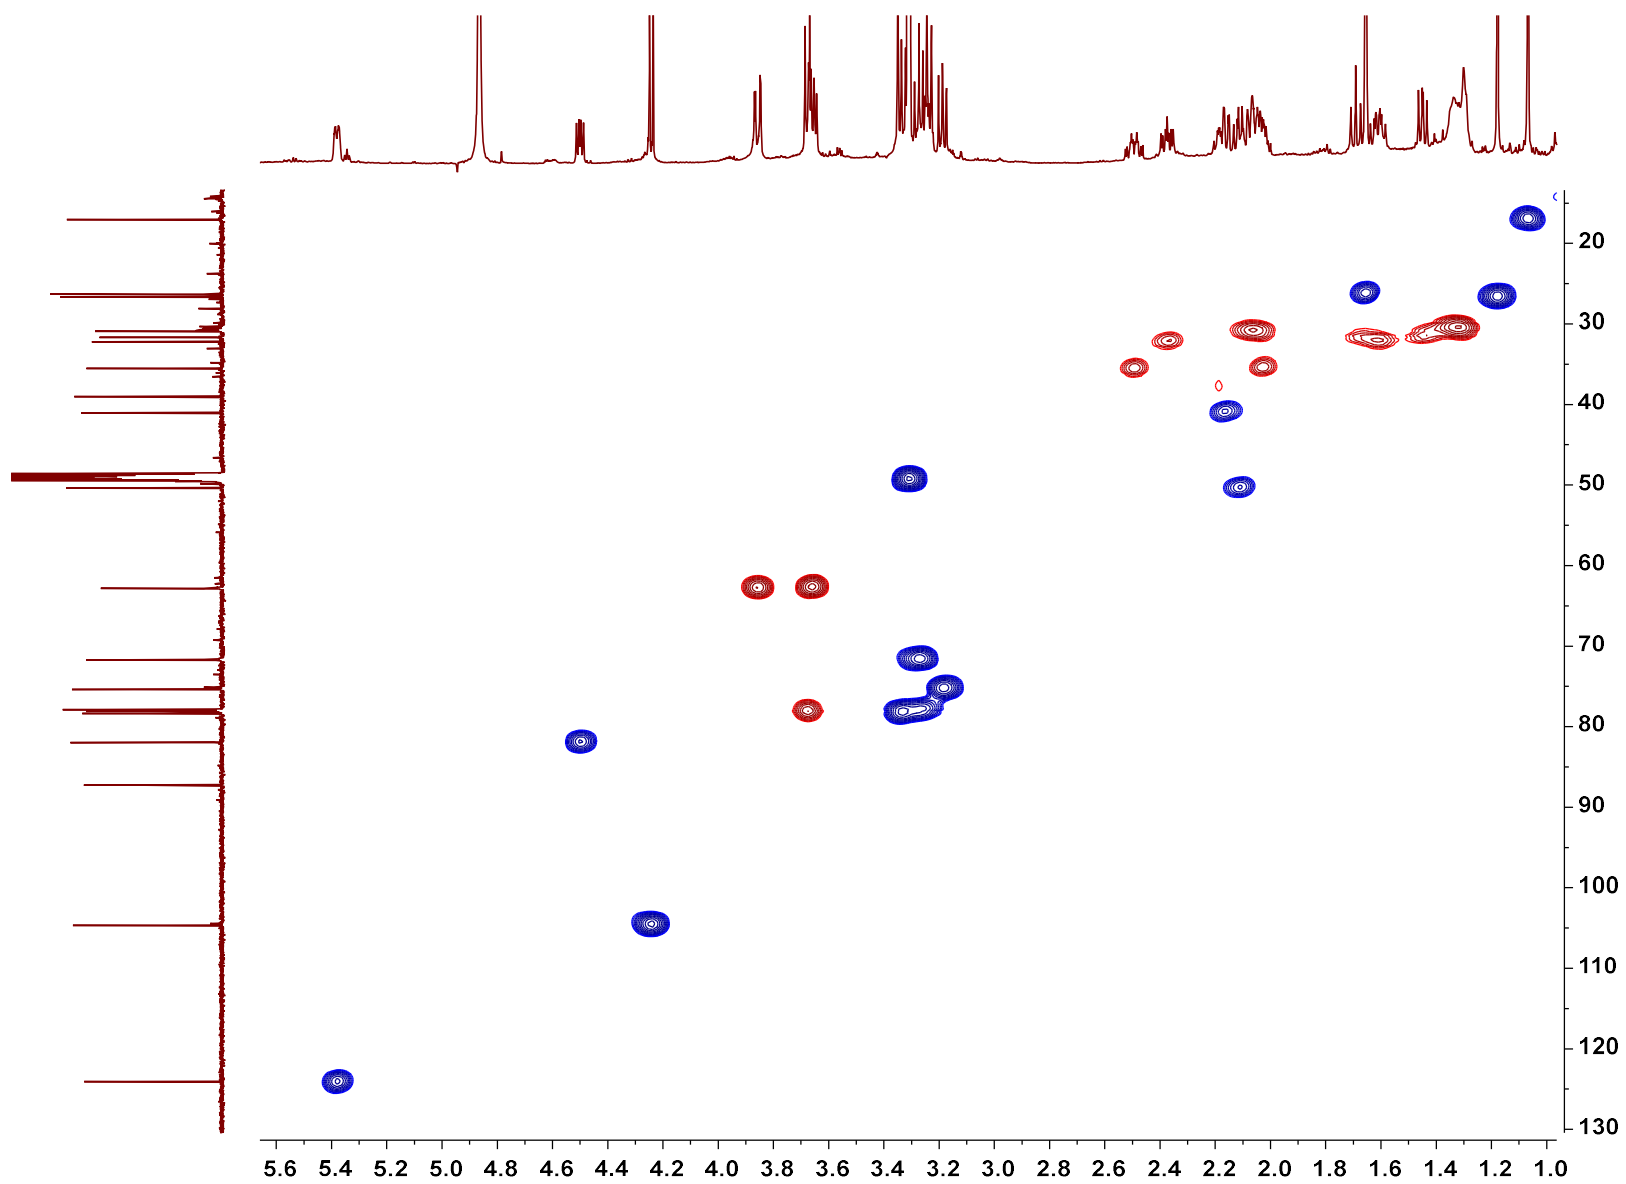

**Figure S28.** The HSQC spectrum of compound **3** in  $\text{CD}_3\text{OD}$

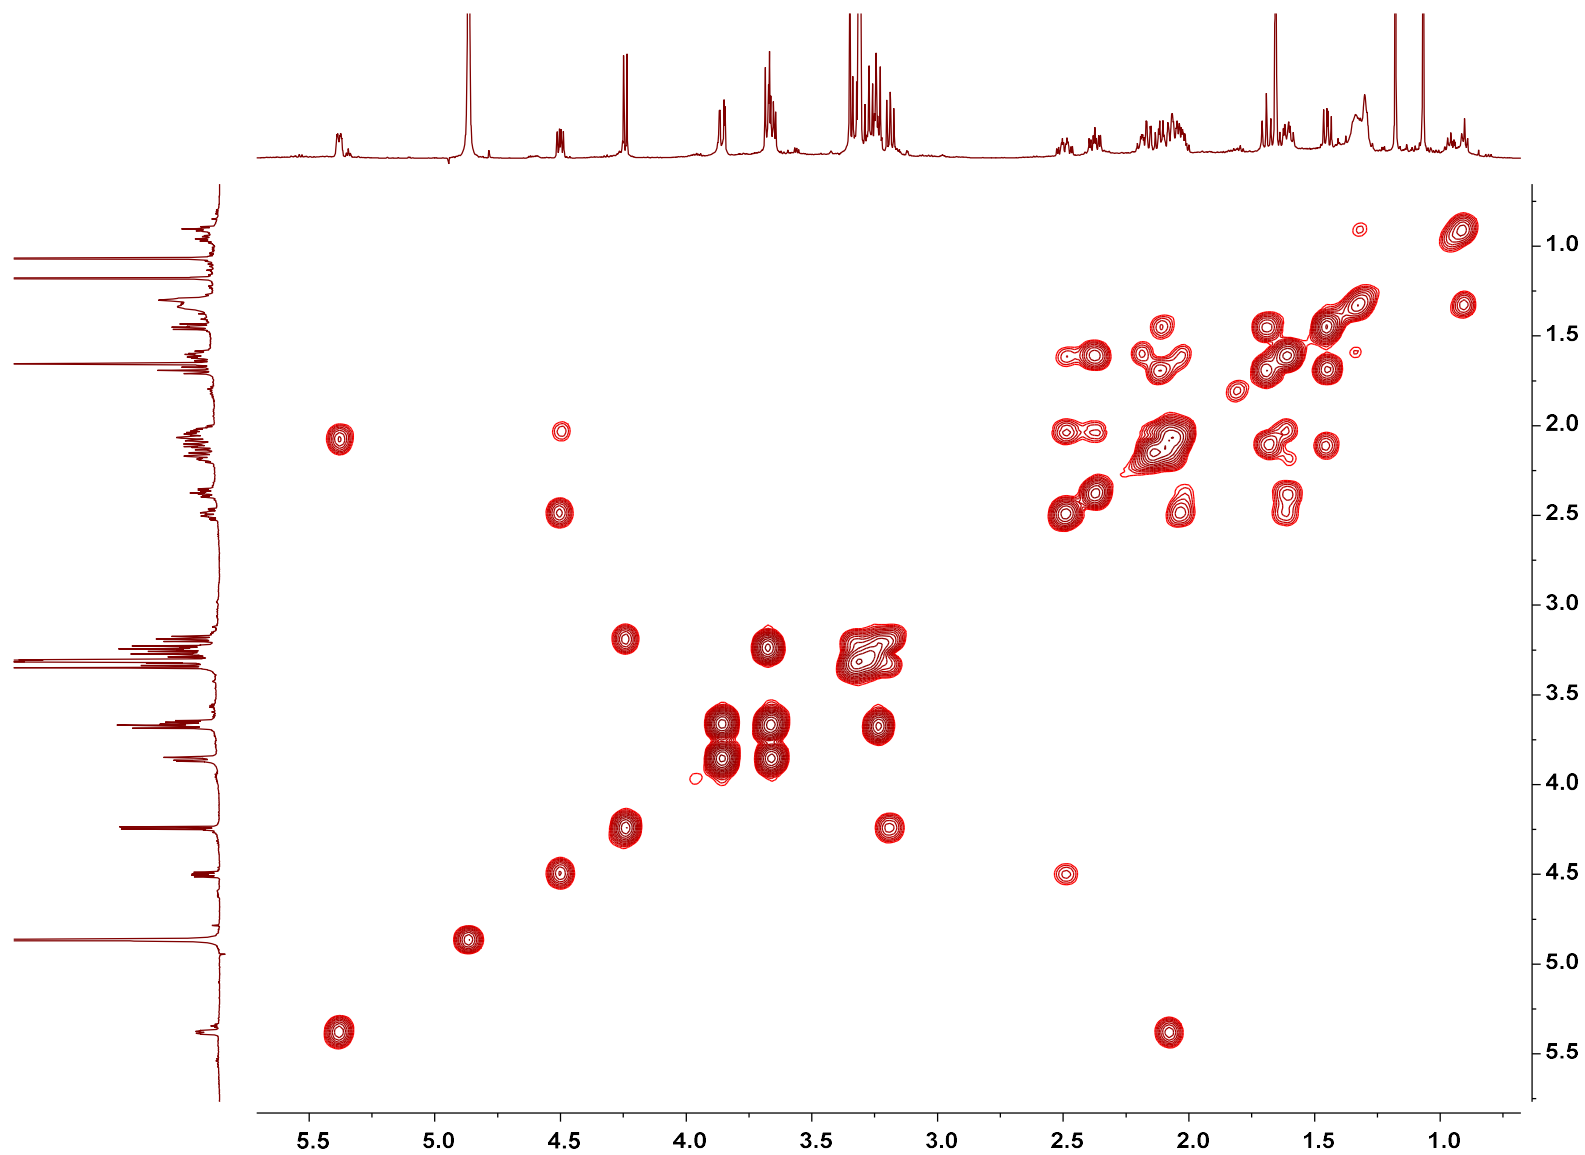

**Figure S29.** The  $^1\text{H}$ - $^1\text{H}$  COSY spectrum of compound **3** in  $\text{CD}_3\text{OD}$

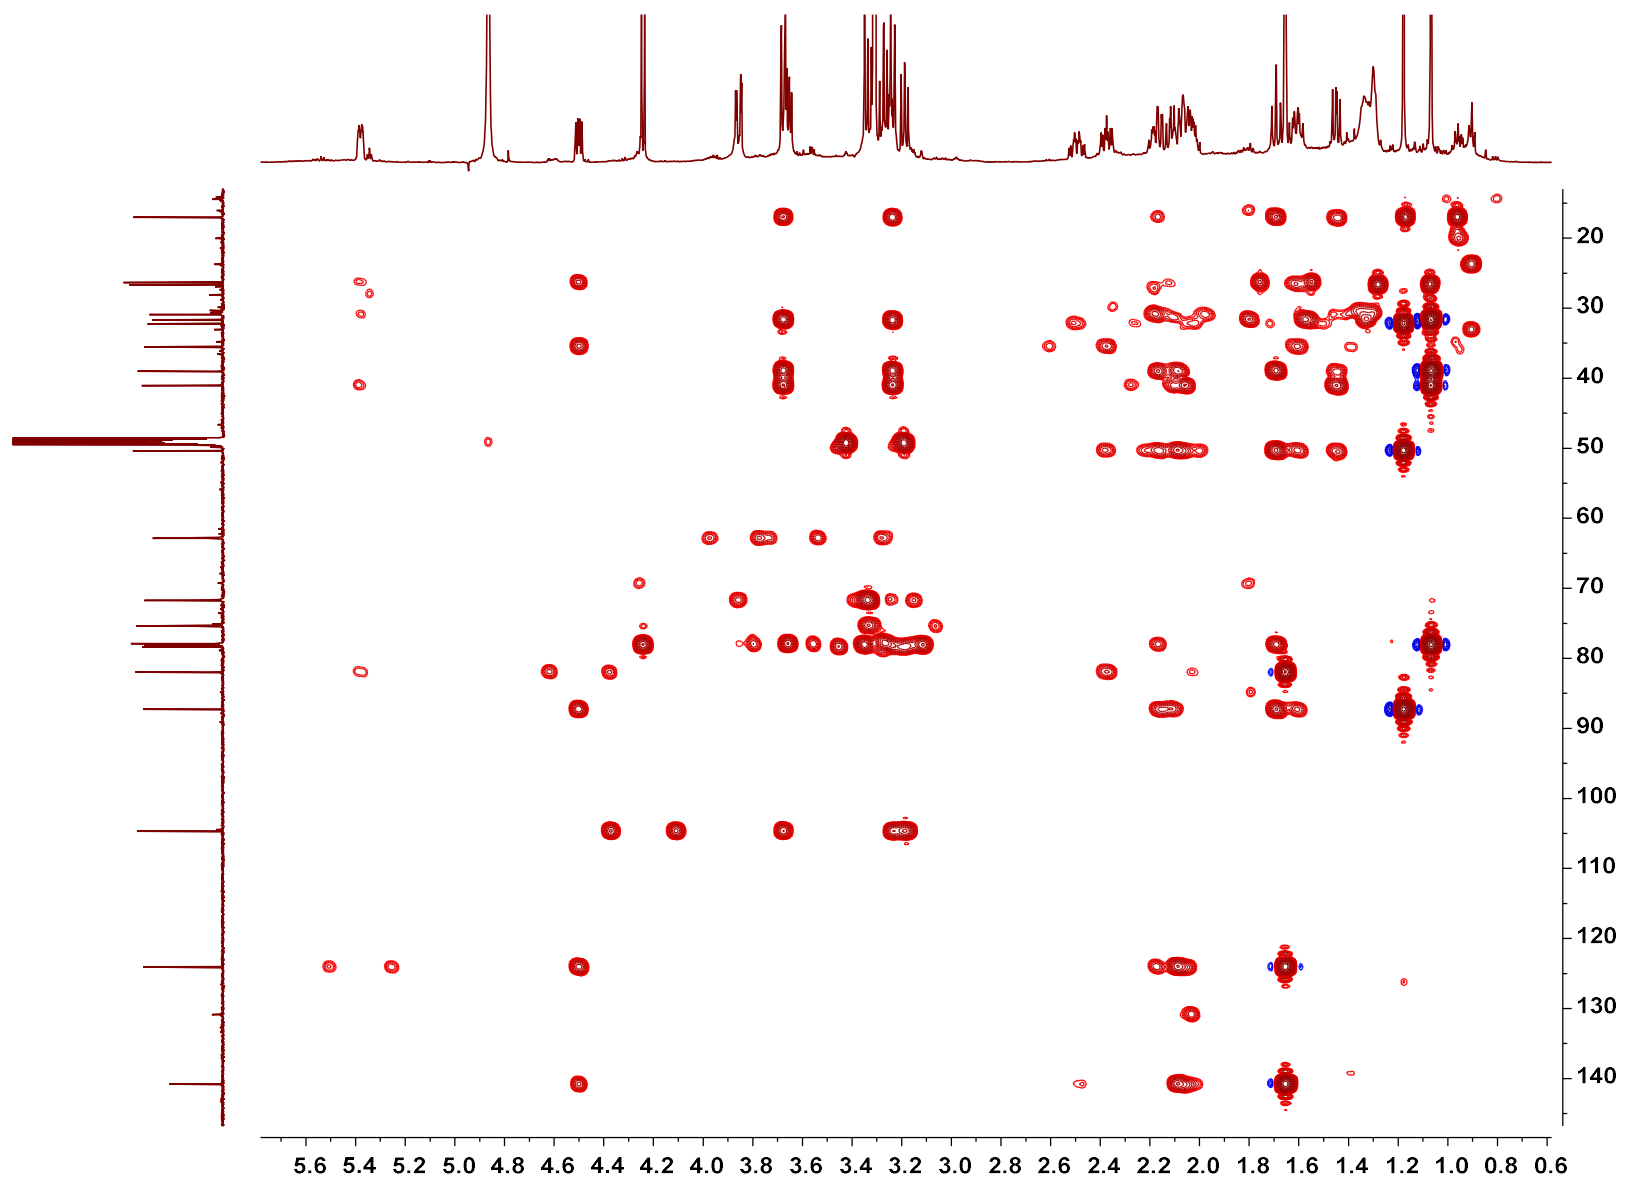

**Figure S30.** The HMBC spectrum of compound **3** in CD<sub>3</sub>OD

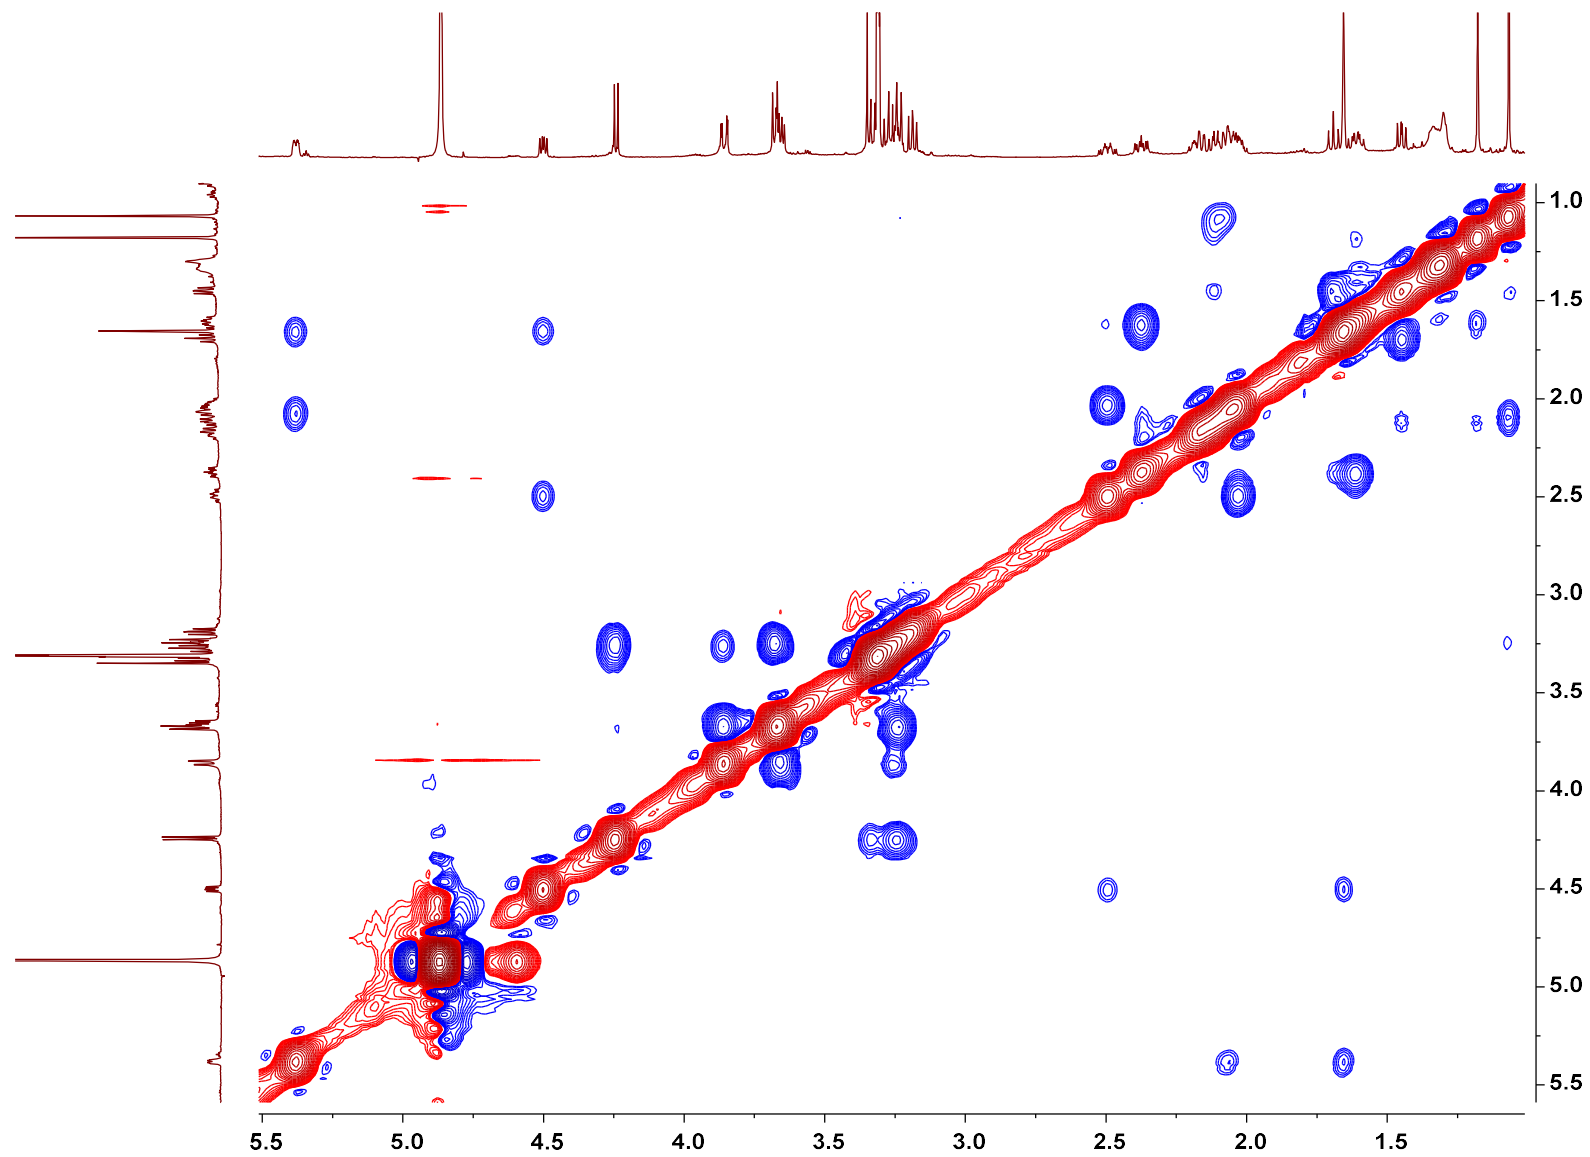

**Figure S31.** The NOESY spectrum of compound **3** in CD<sub>3</sub>OD

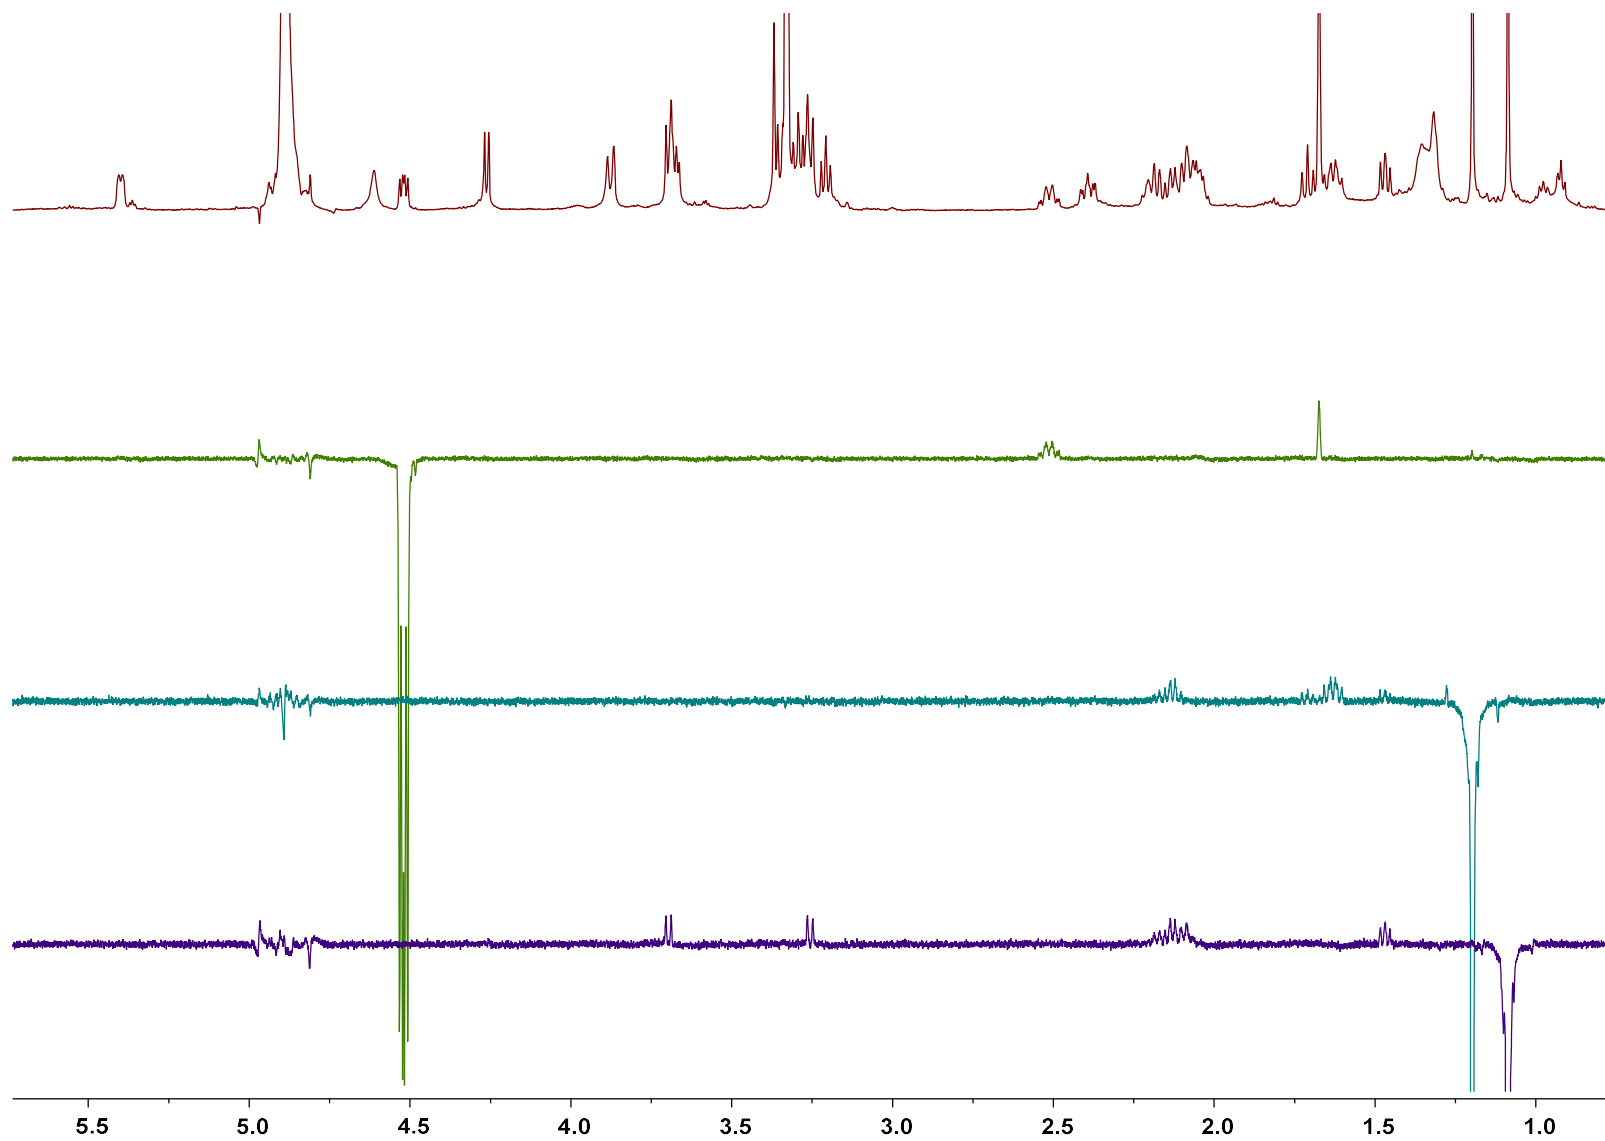

**Figure S32.** The 1D NOE spectrum of compound **3** in CD<sub>3</sub>OD

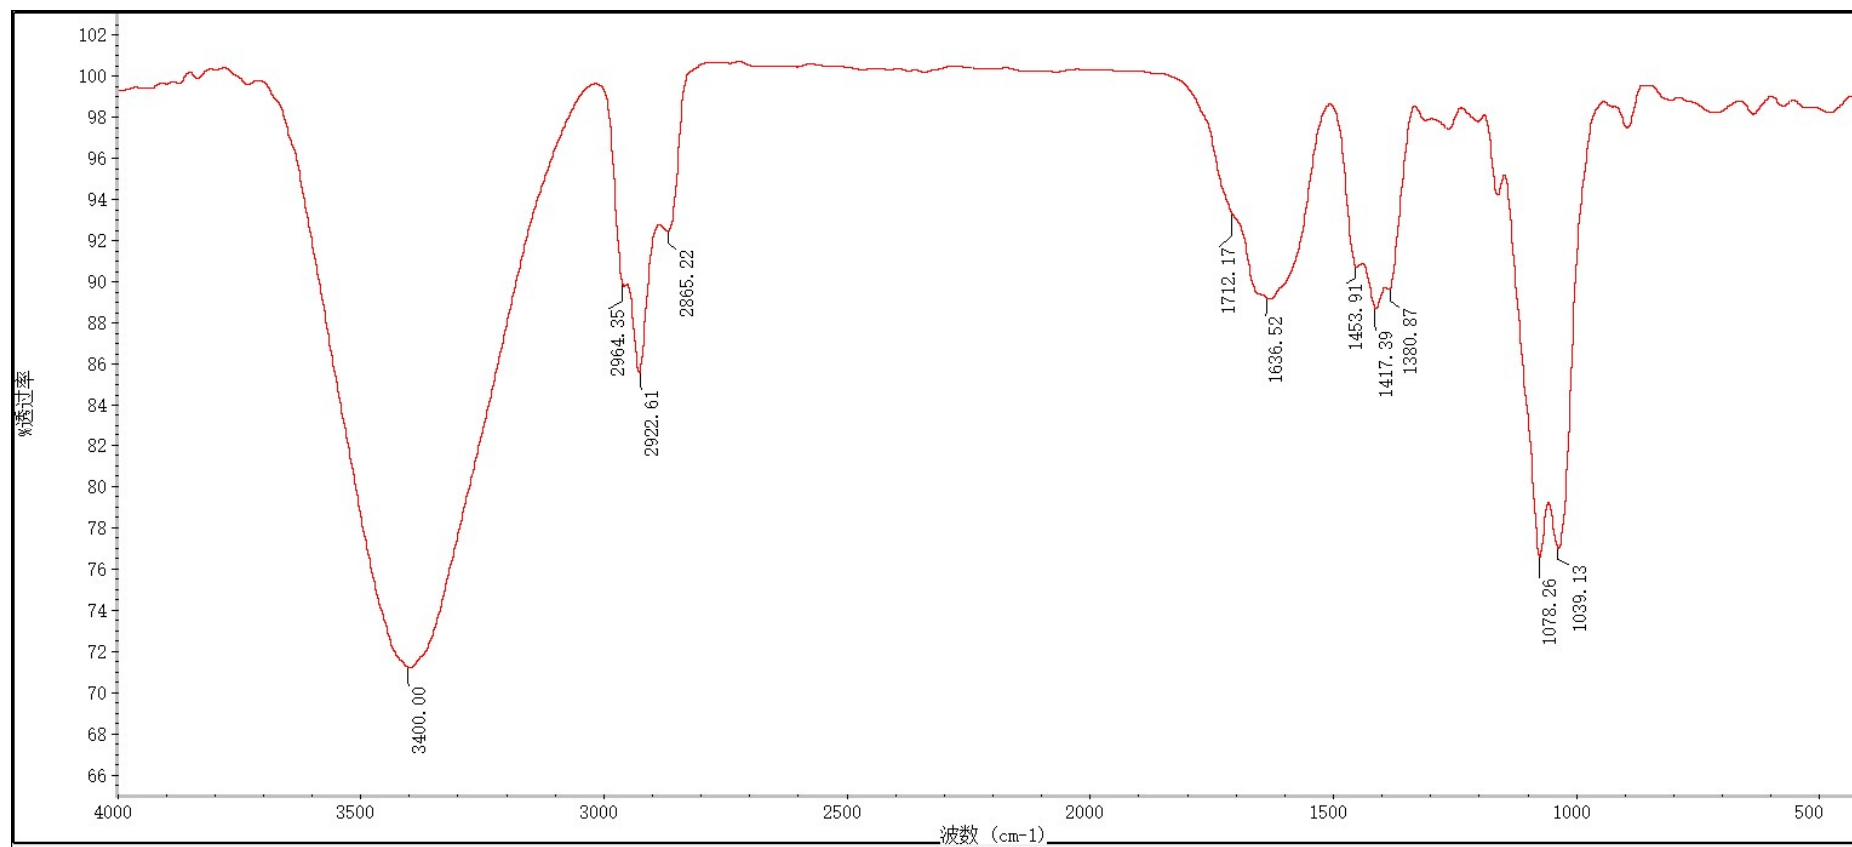

**Figure S33.** The IR spectrum of compound **3**

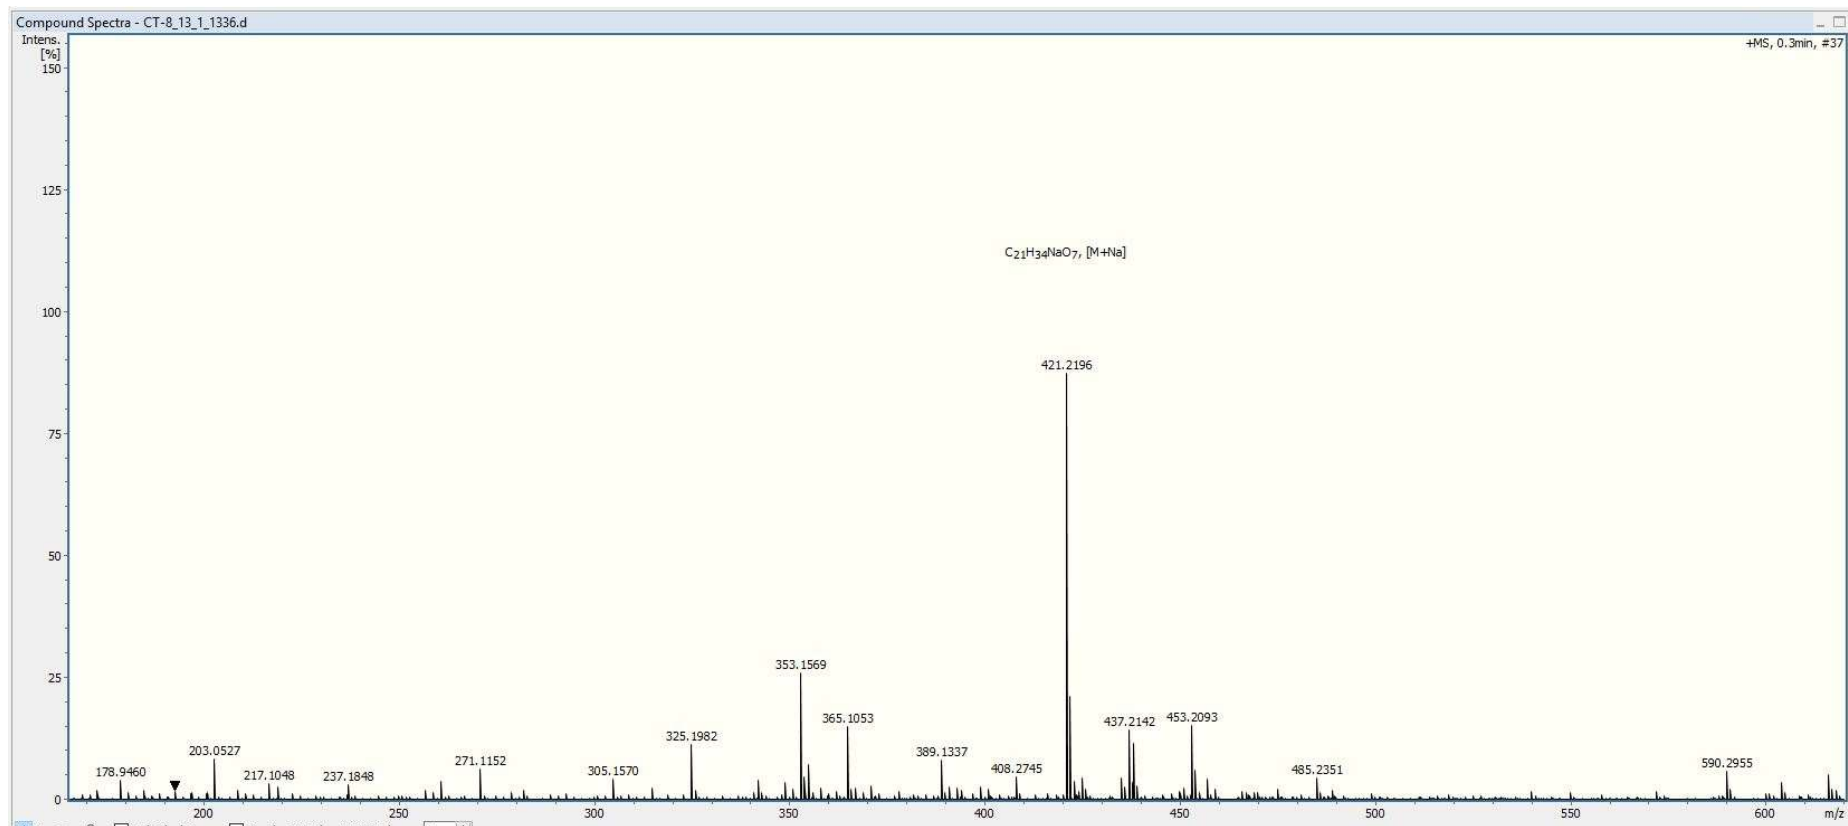

**Figure S34.** The (+)-HR-ESI-MS spectroscopic data of compound **3**



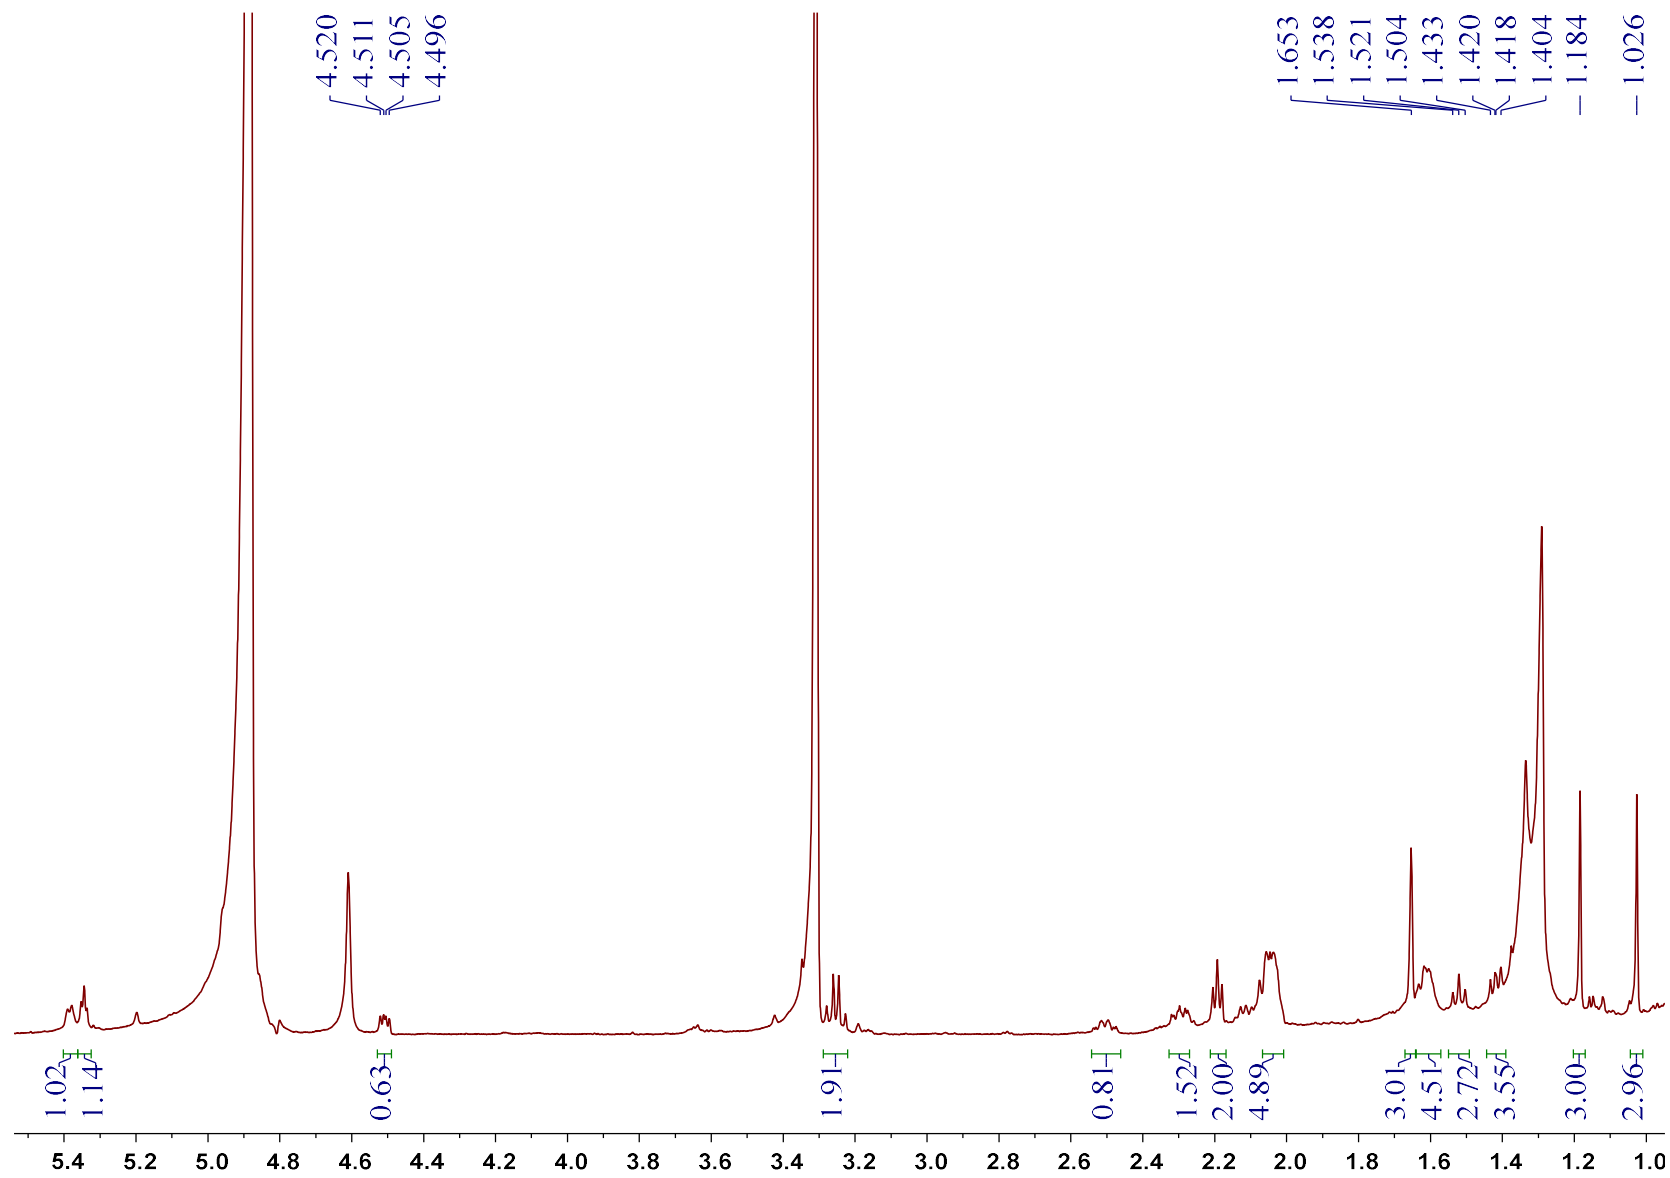

Figure S35. The  $^1\text{H}$  NMR spectrum of compound **3a** in  $\text{CD}_3\text{OD}$

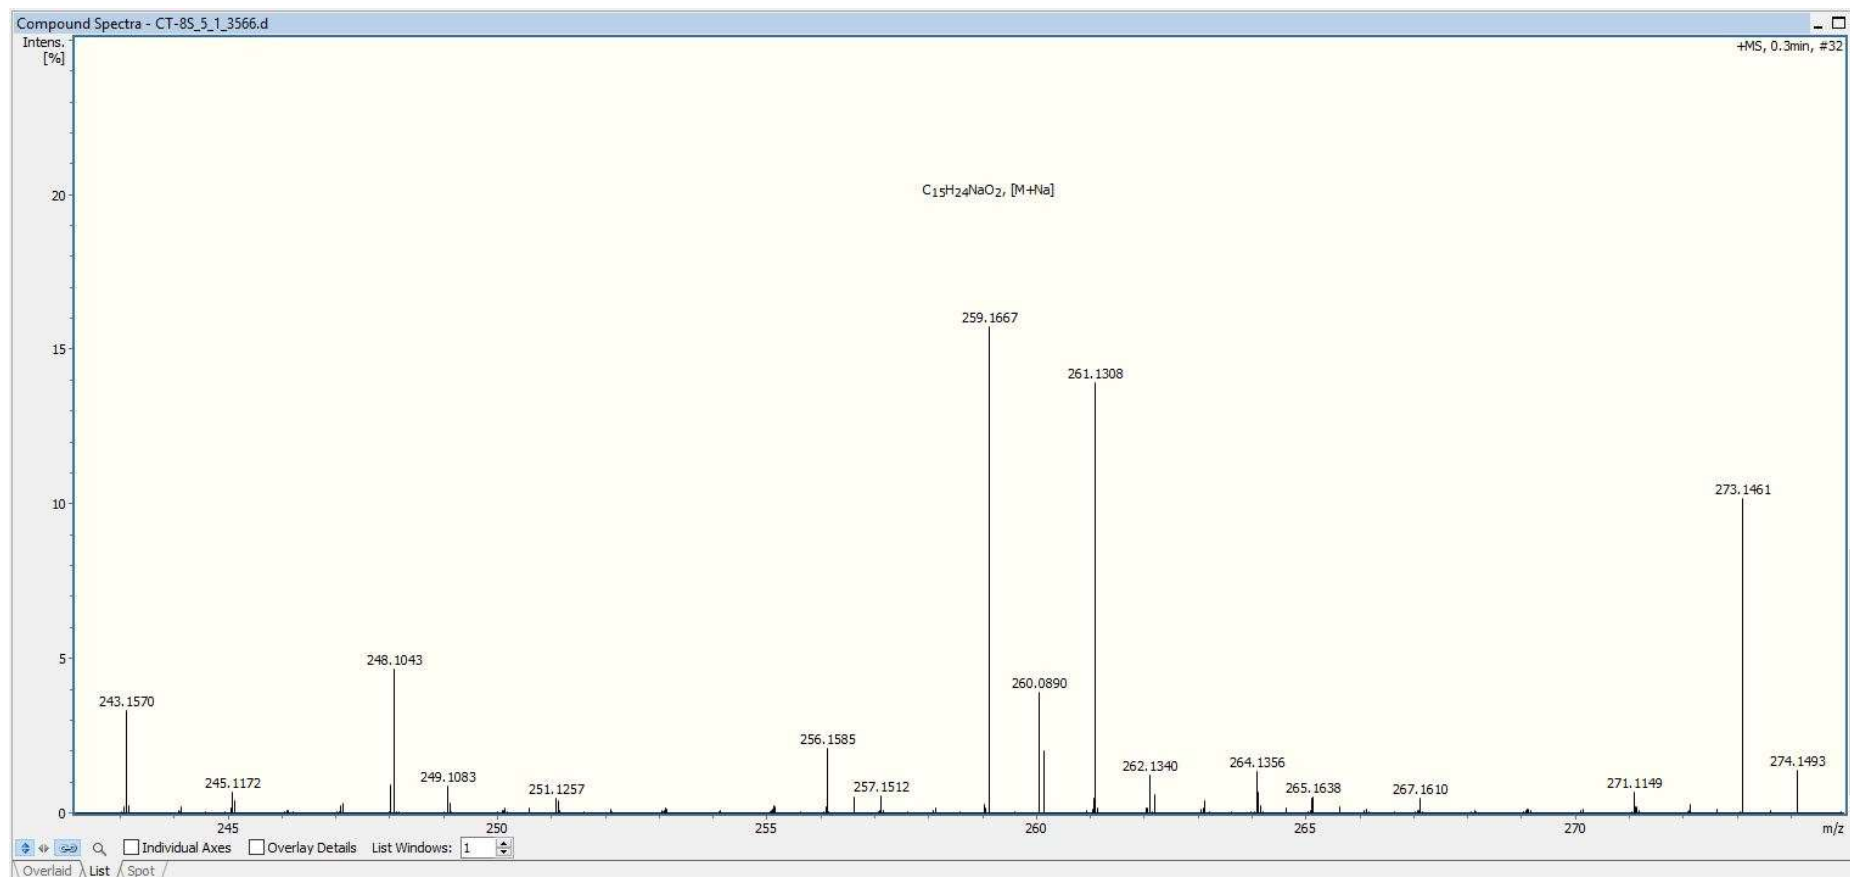

**Figure S36.** The (+)-HR-ESI-MS spectroscopic data of compound **3a**

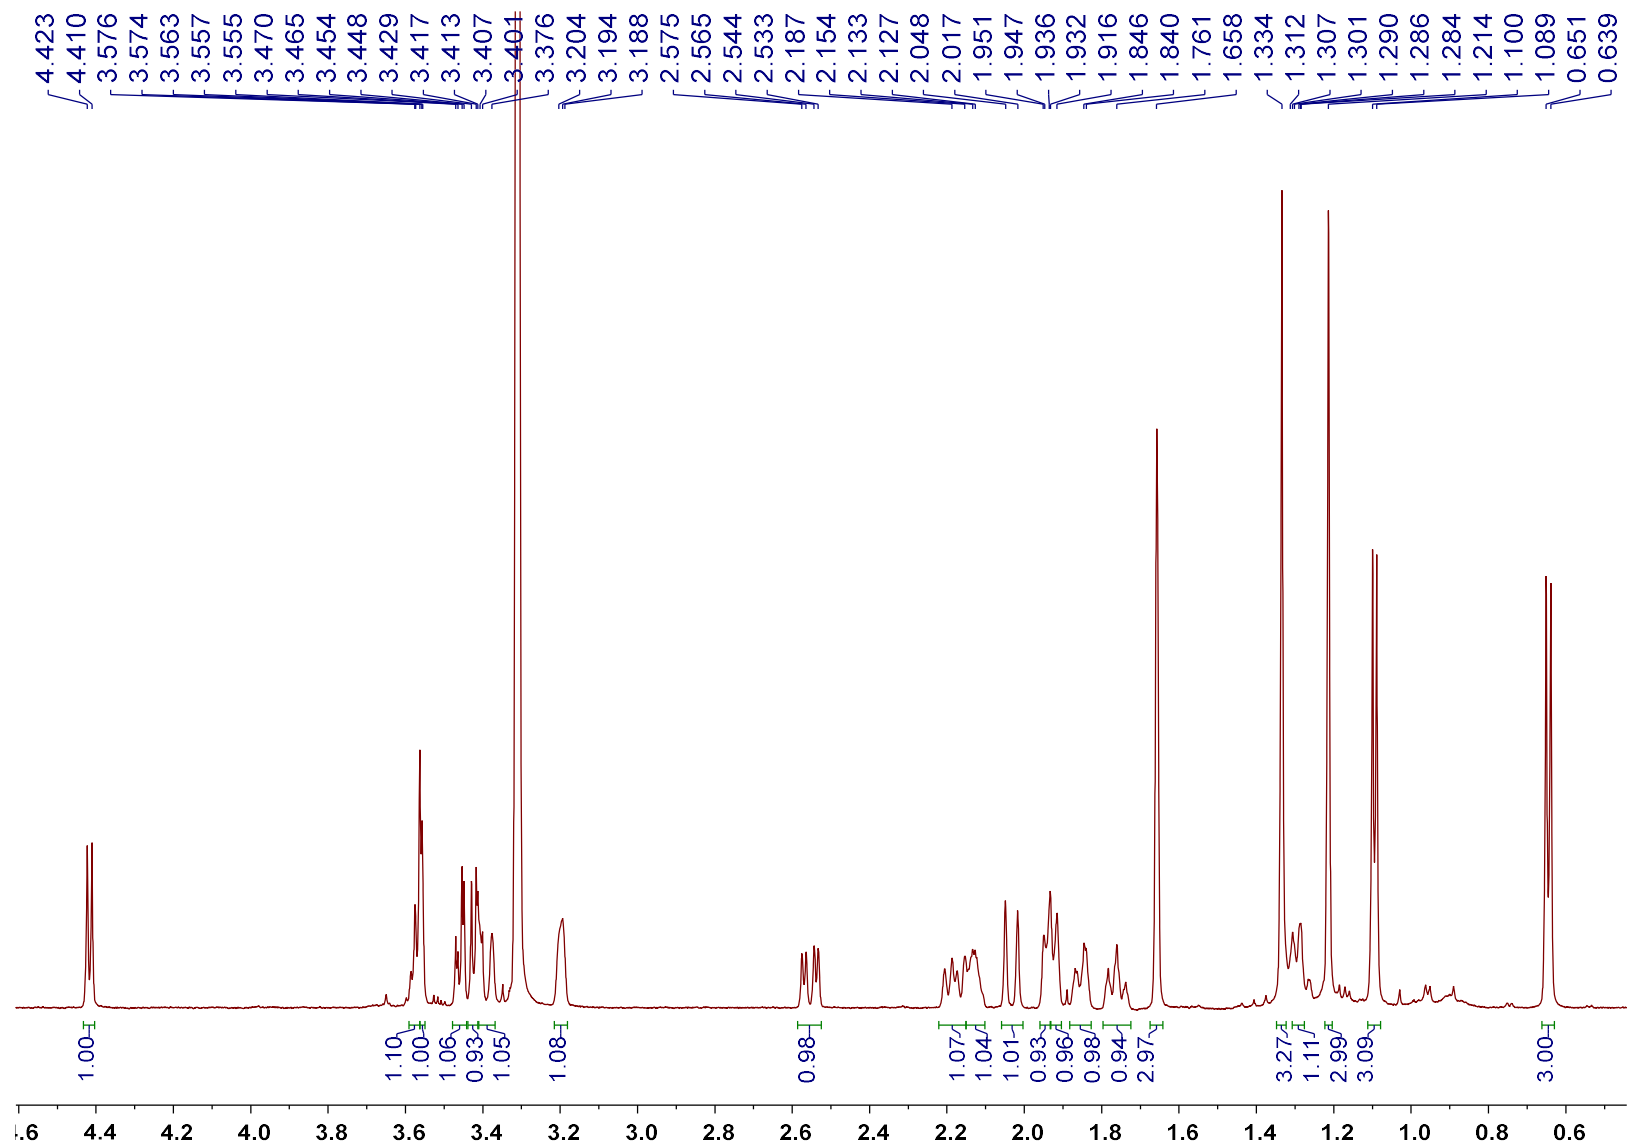

Figure S37. The  $^1\text{H}$  NMR spectrum of compound **4** in  $\text{CD}_3\text{OD}$

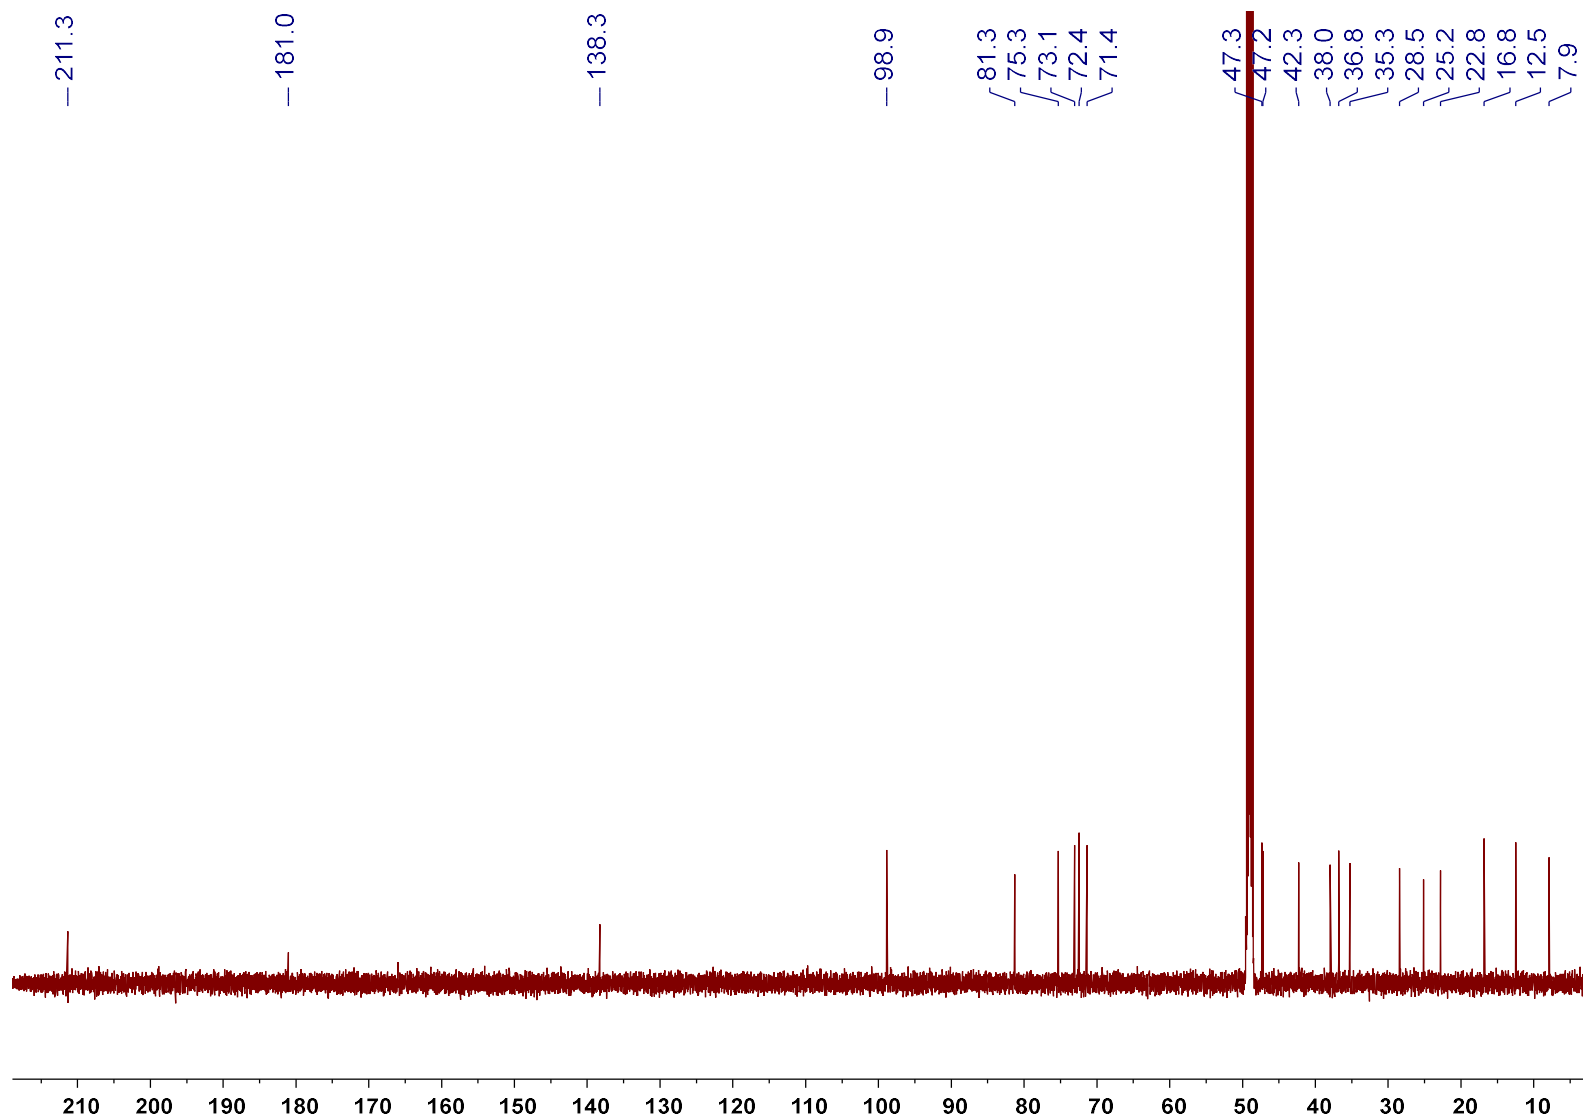

Figure S38. The <sup>13</sup>C NMR spectrum of compound 4 in CD<sub>3</sub>OD

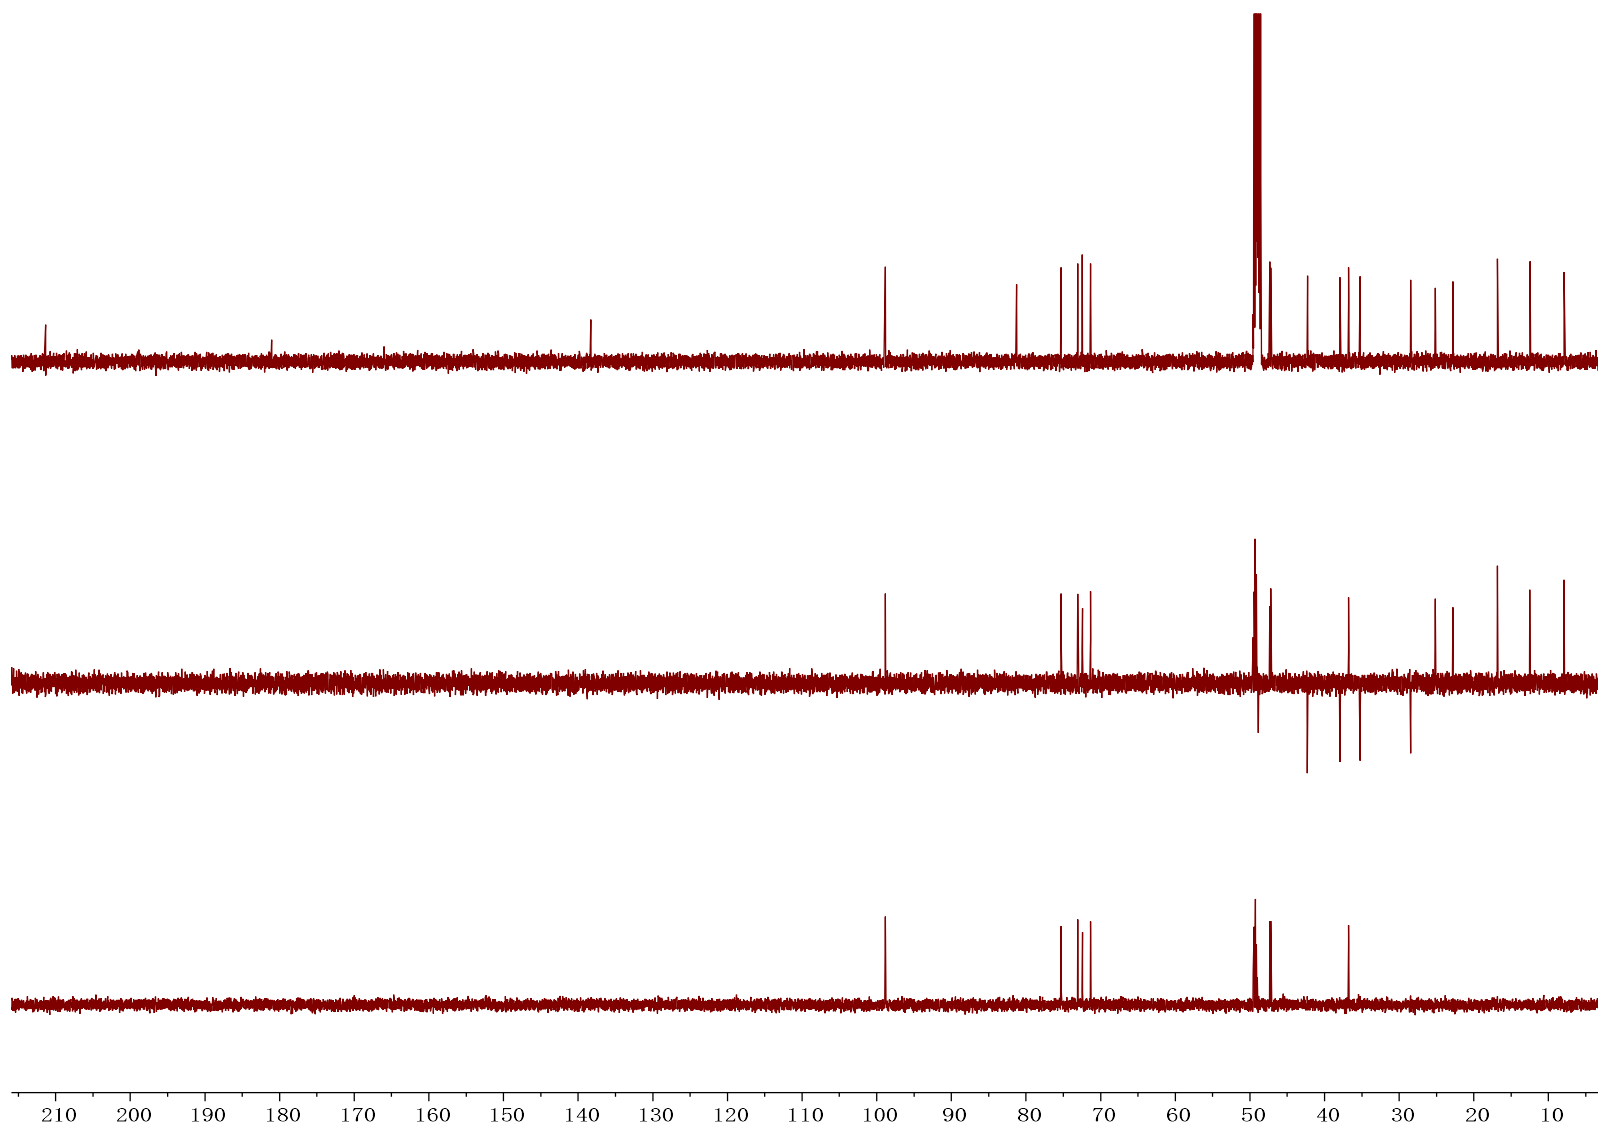

**Figure S39.** The DEPT spectrum of compound **4** in CD<sub>3</sub>OD

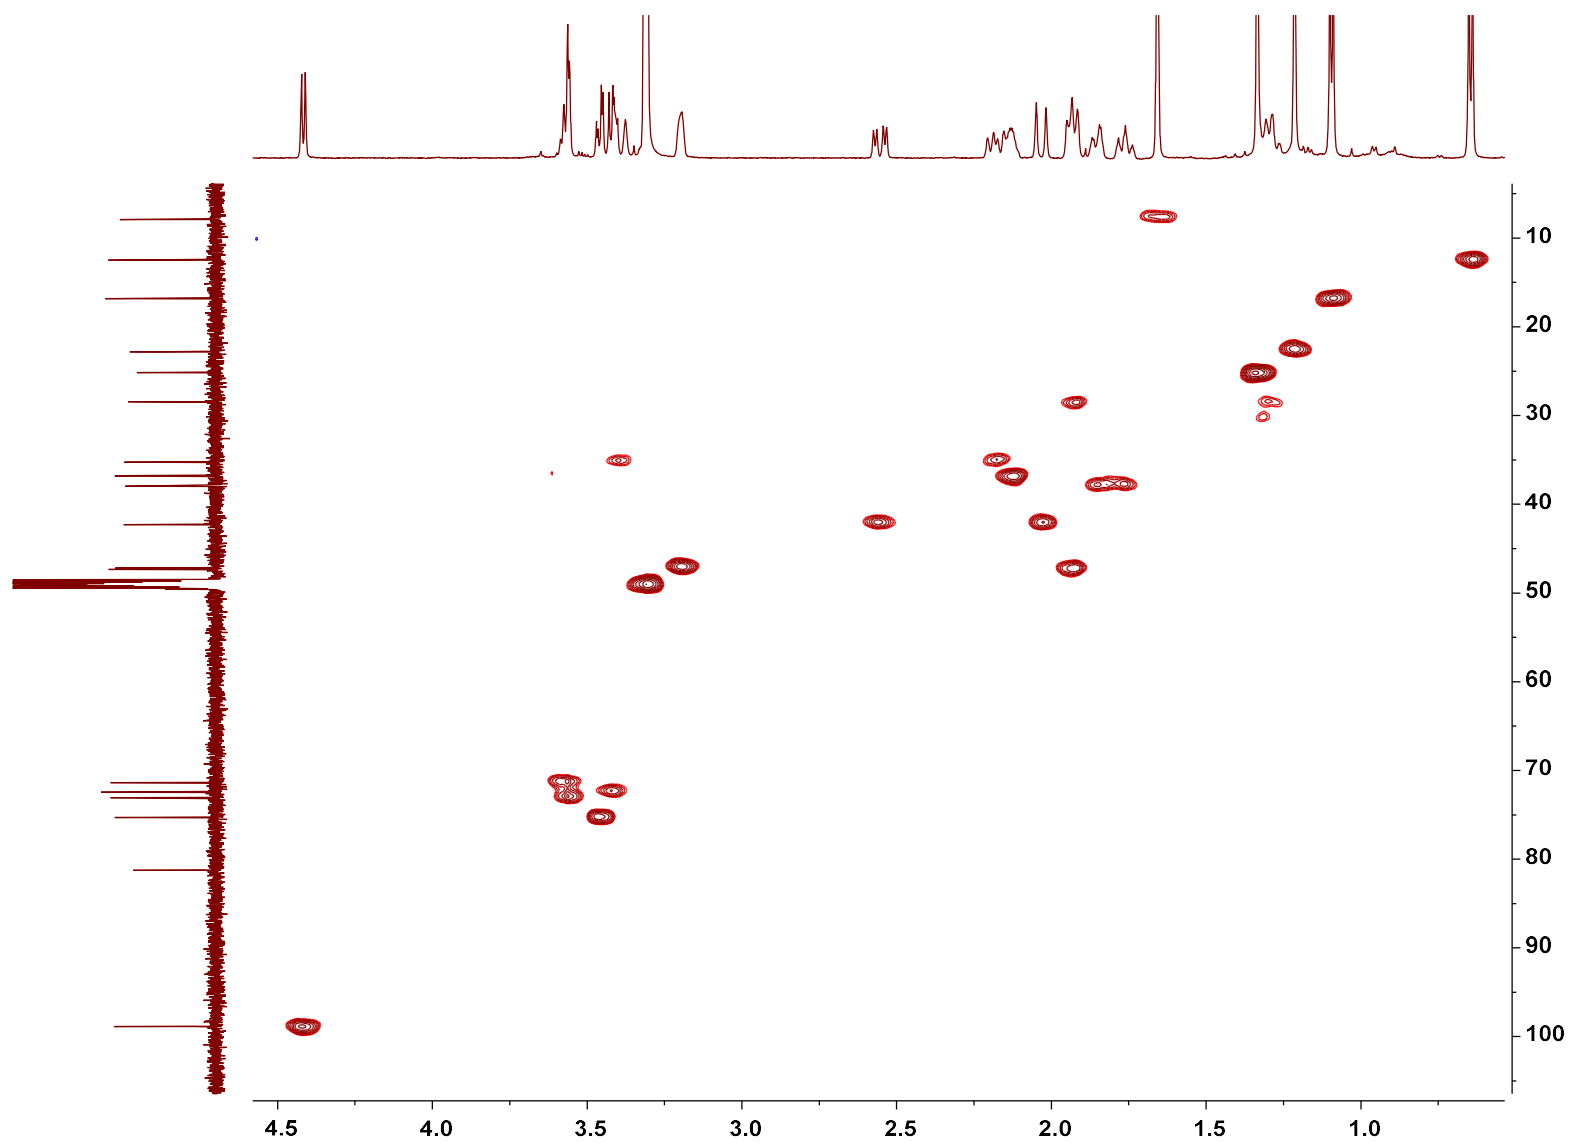

**Figure S40.** The HSQC spectrum of compound **4** in  $\text{CD}_3\text{OD}$

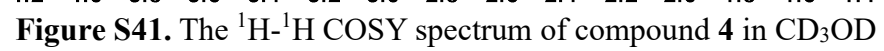

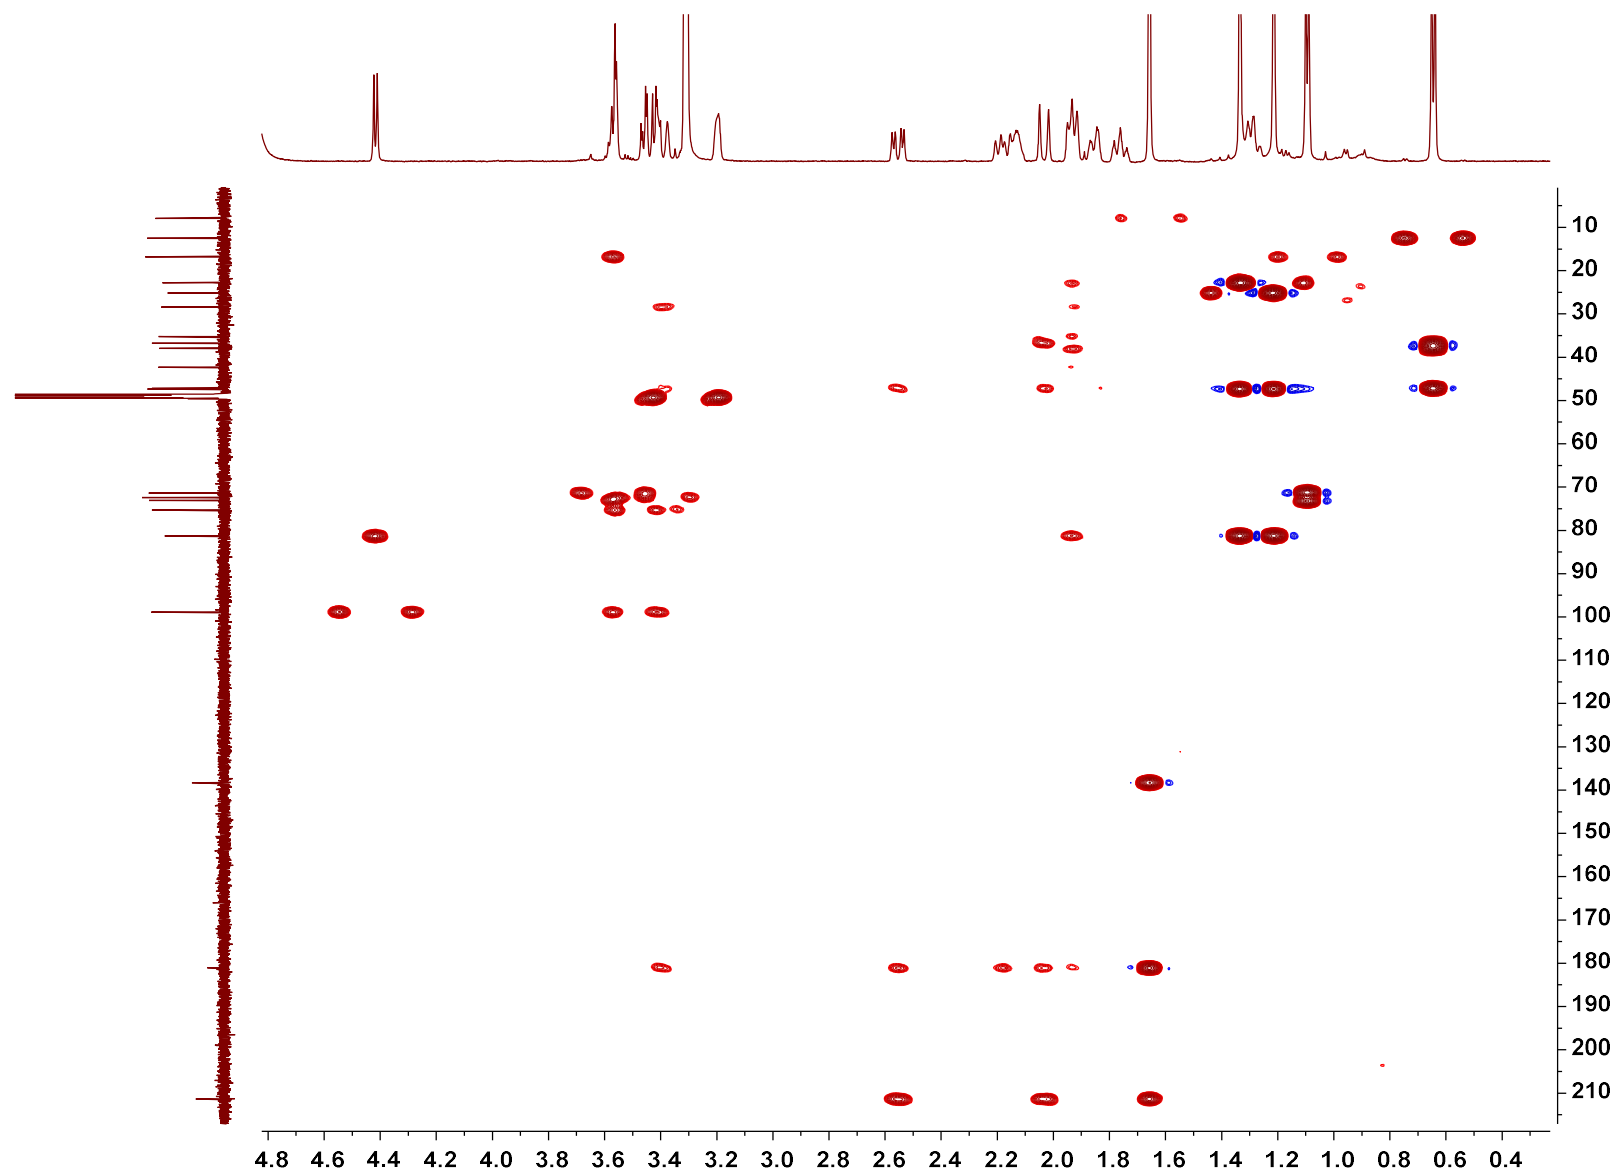

Figure S42. The HMBC spectrum of compound 4 in CD<sub>3</sub>OD



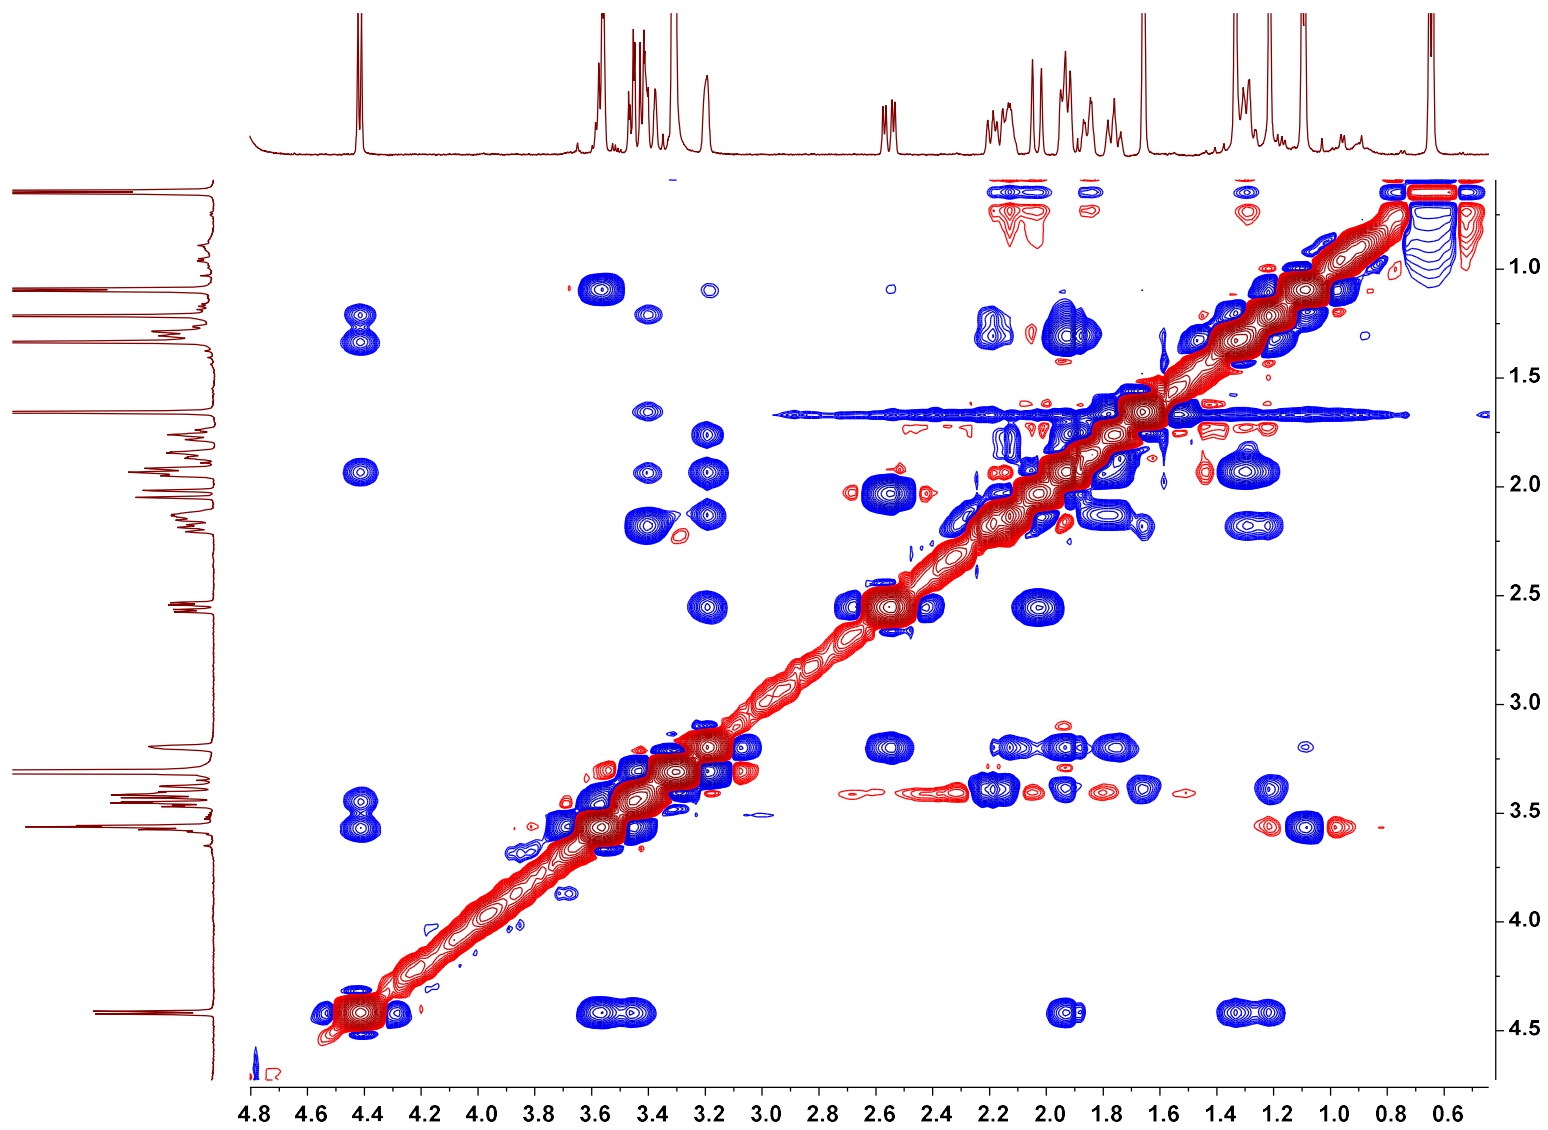

**Figure S43.** The NOESY spectrum of compound **4** in CD<sub>3</sub>OD

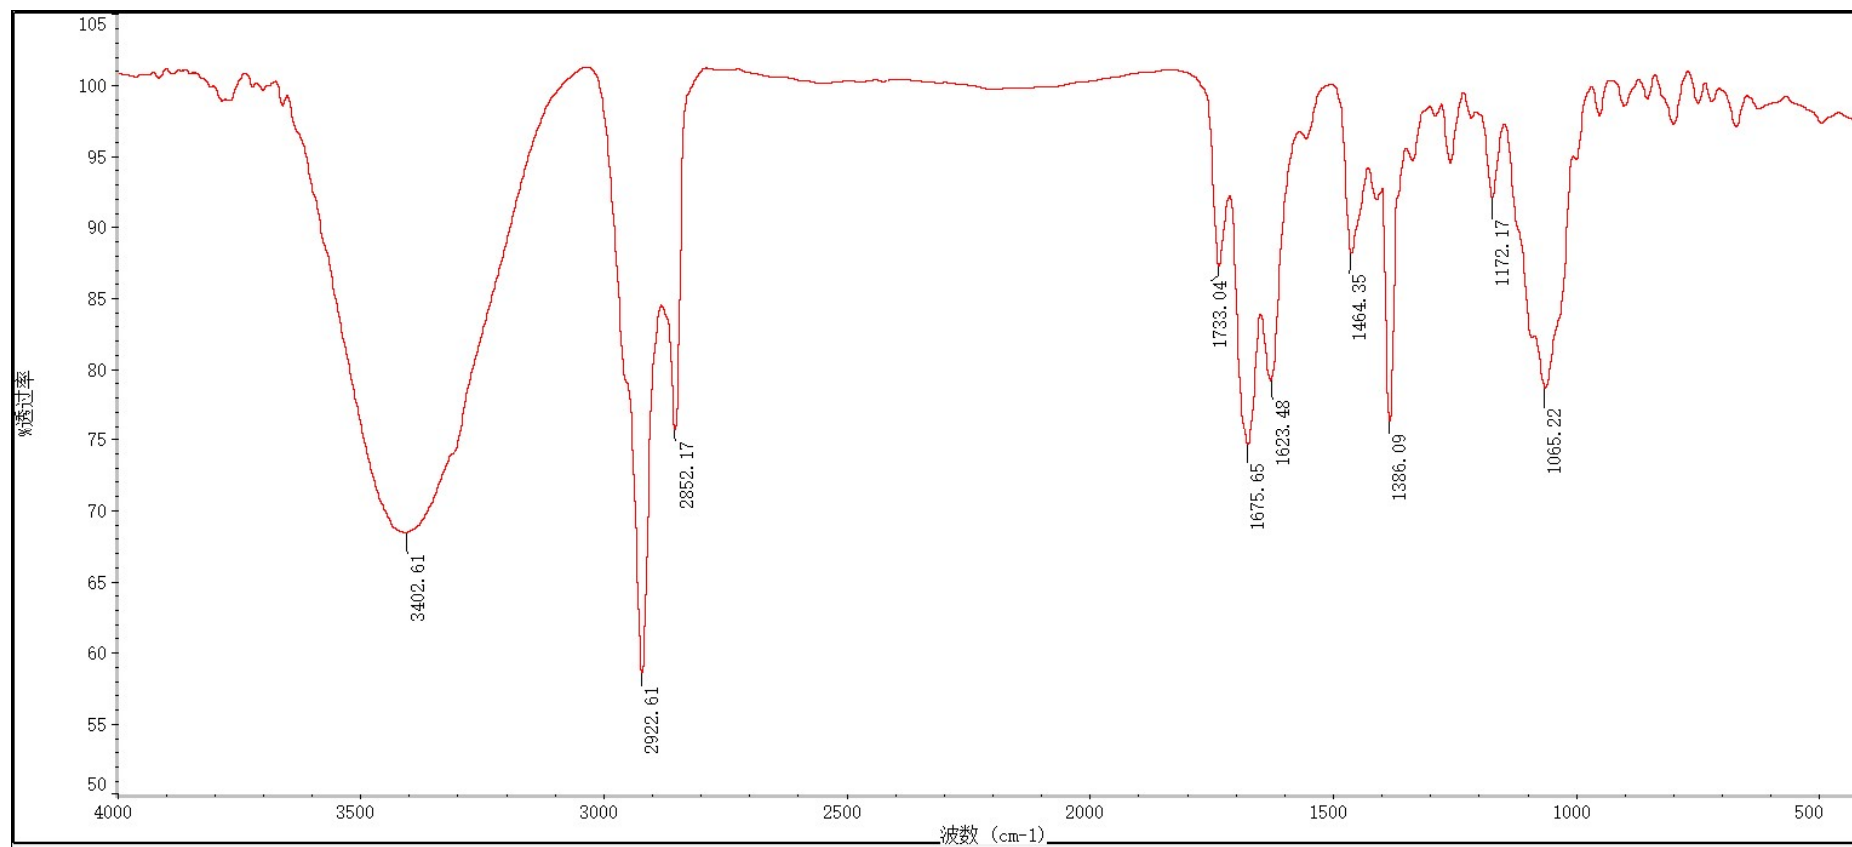

**Figure S44.** The IR spectrum of compound **4**

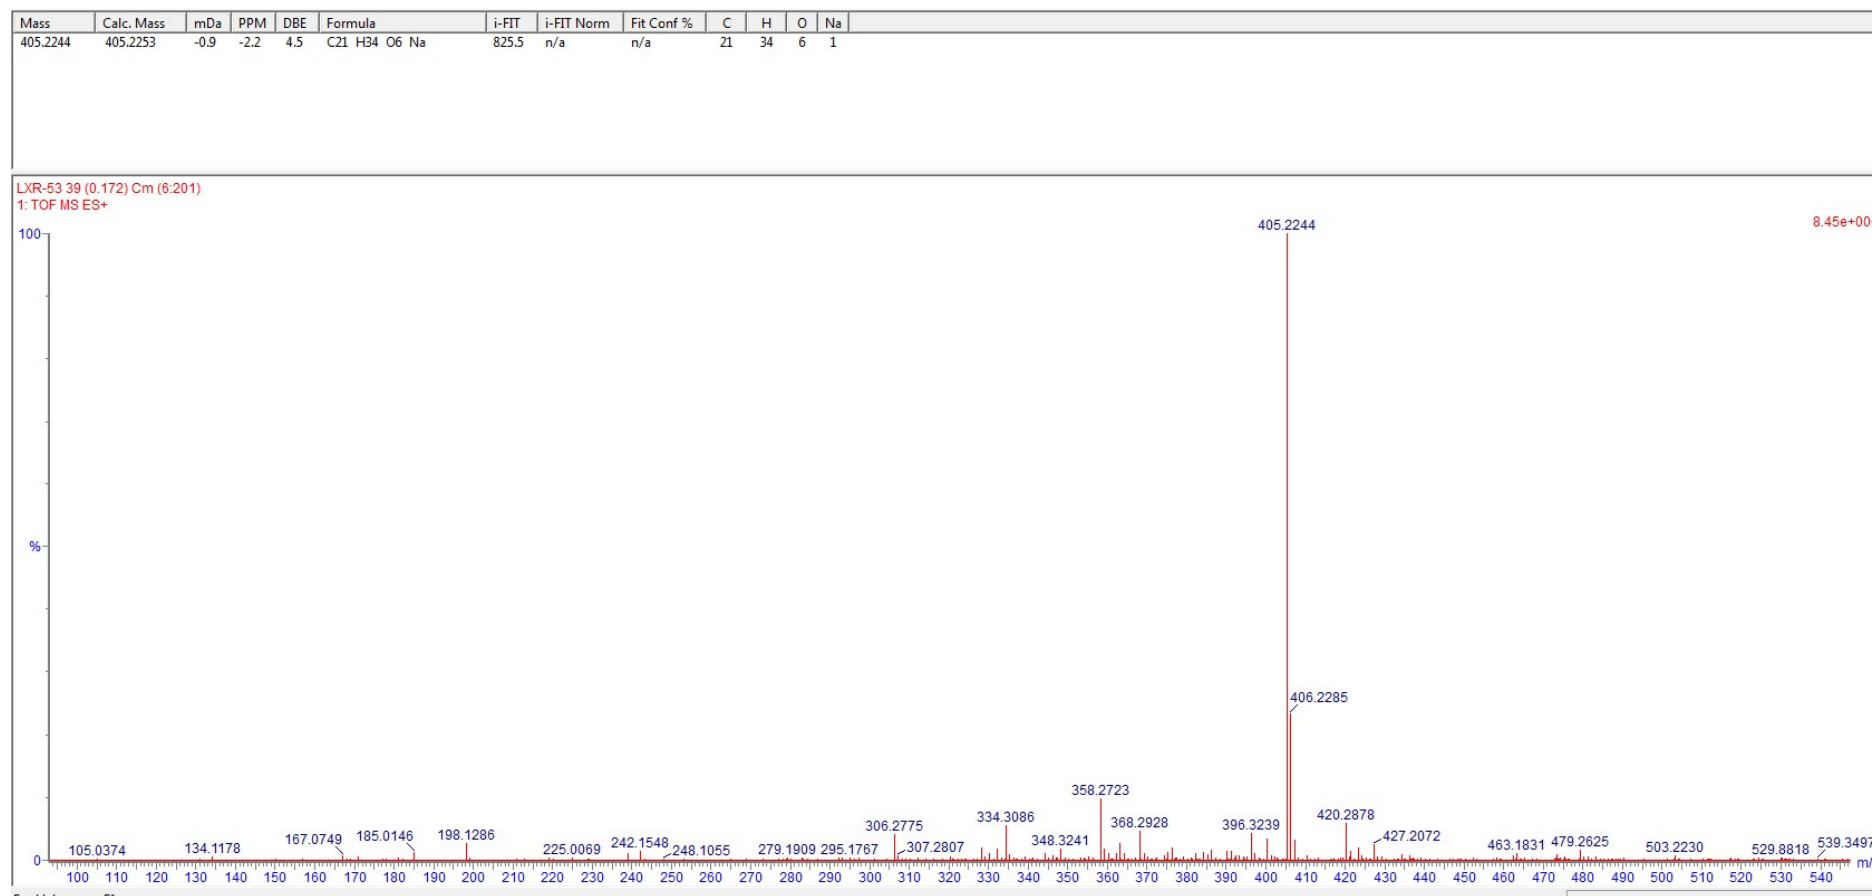

**Figure S45.** The (+)-HR-ESI-MS spectroscopic data of compound **4**

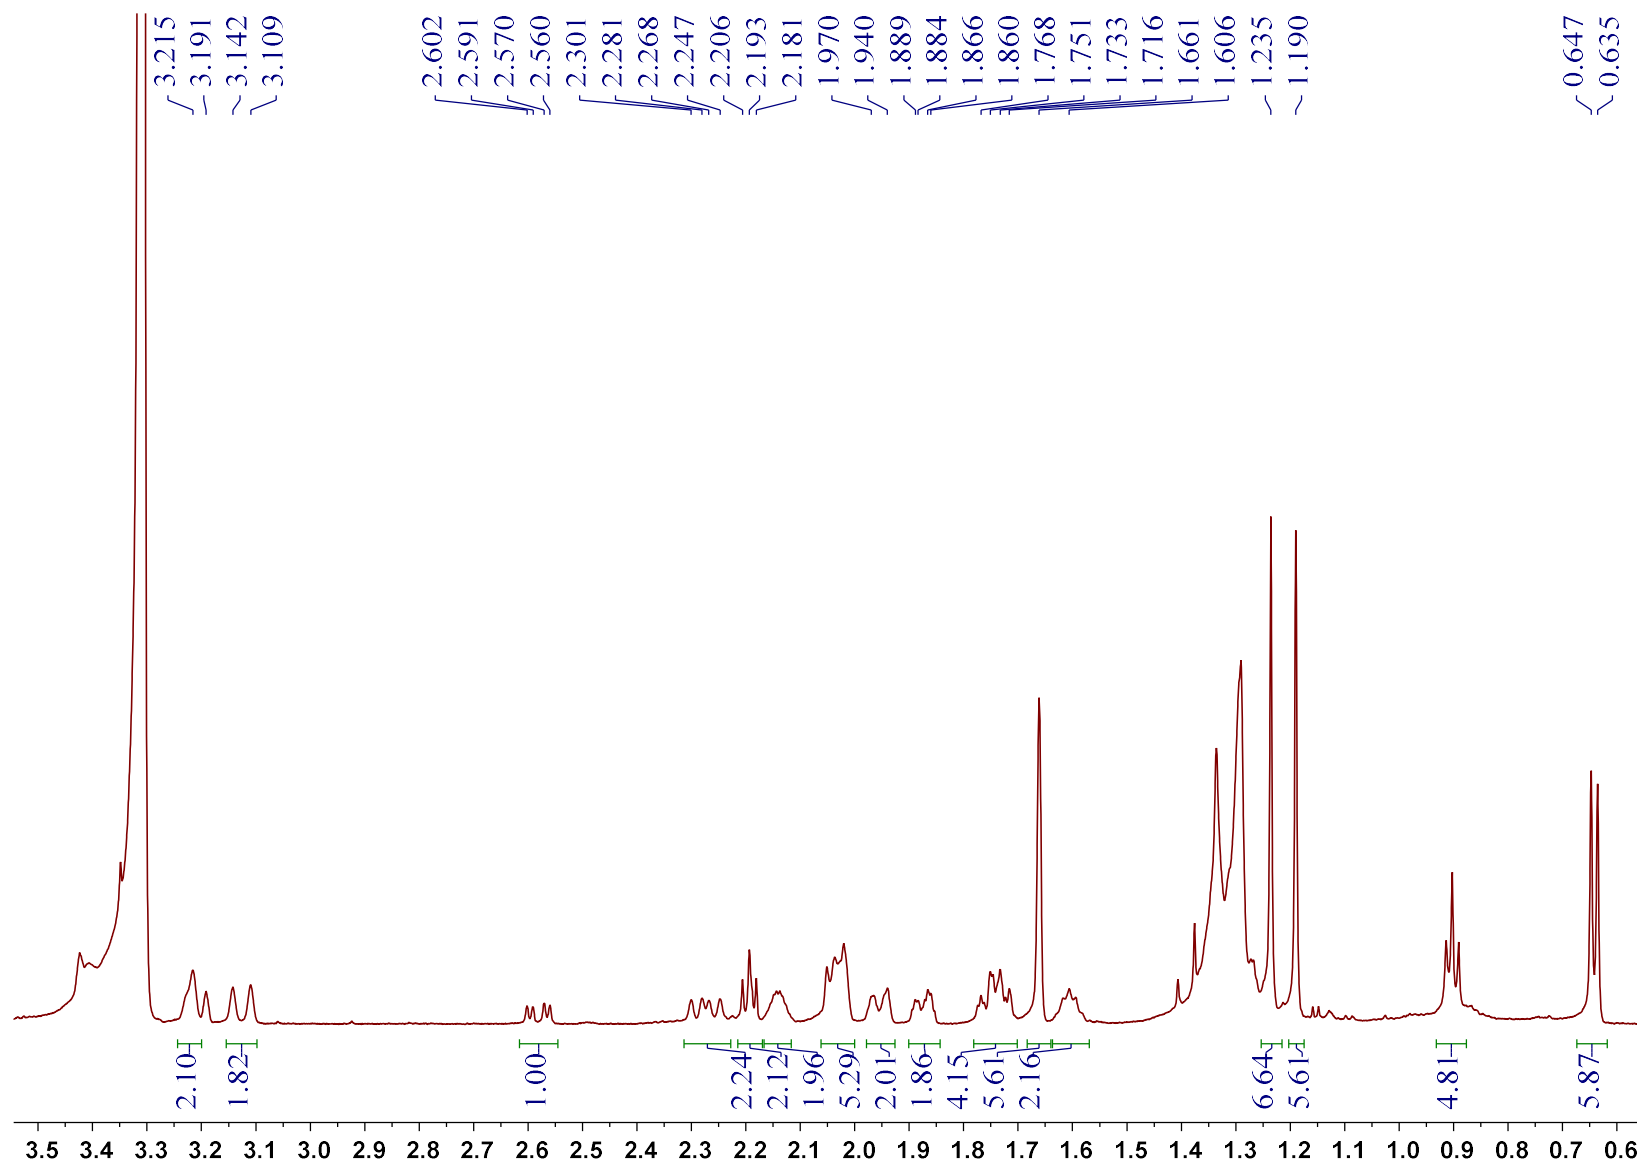

Figure S46. The  $^1\text{H}$  NMR spectrum of compound **4a** in  $\text{CD}_3\text{OD}$

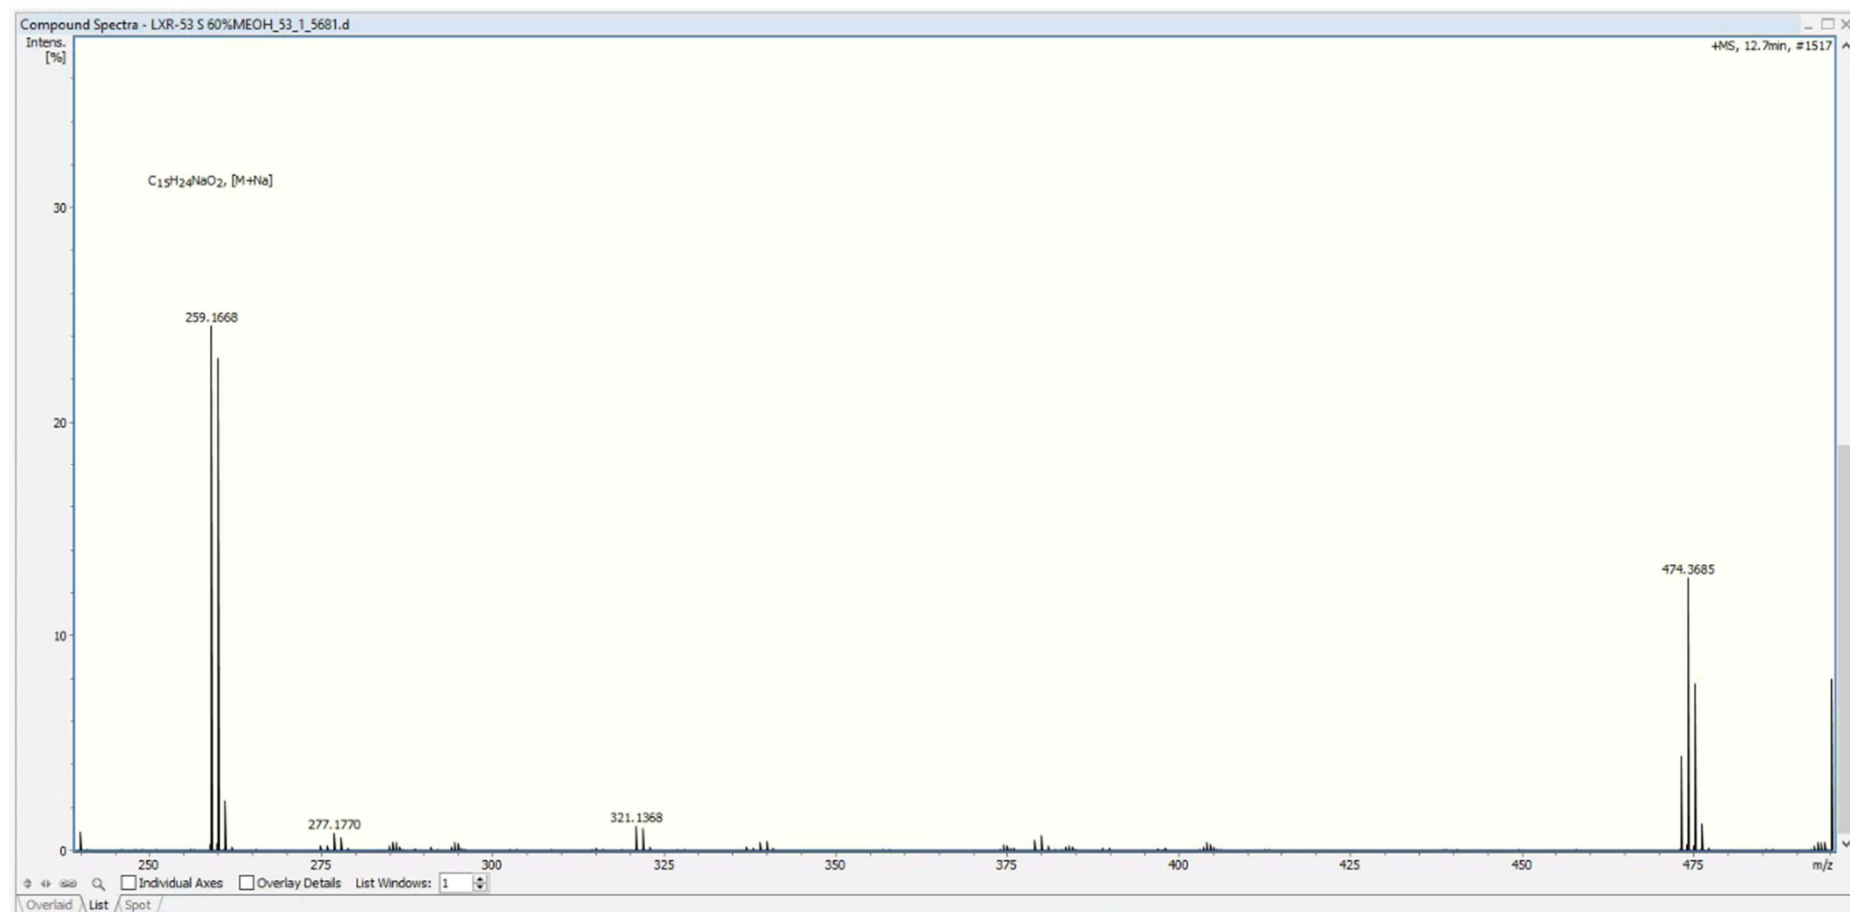

**Figure S47.** The (+)-HR-ESI-MS spectroscopic data of compound **4a**

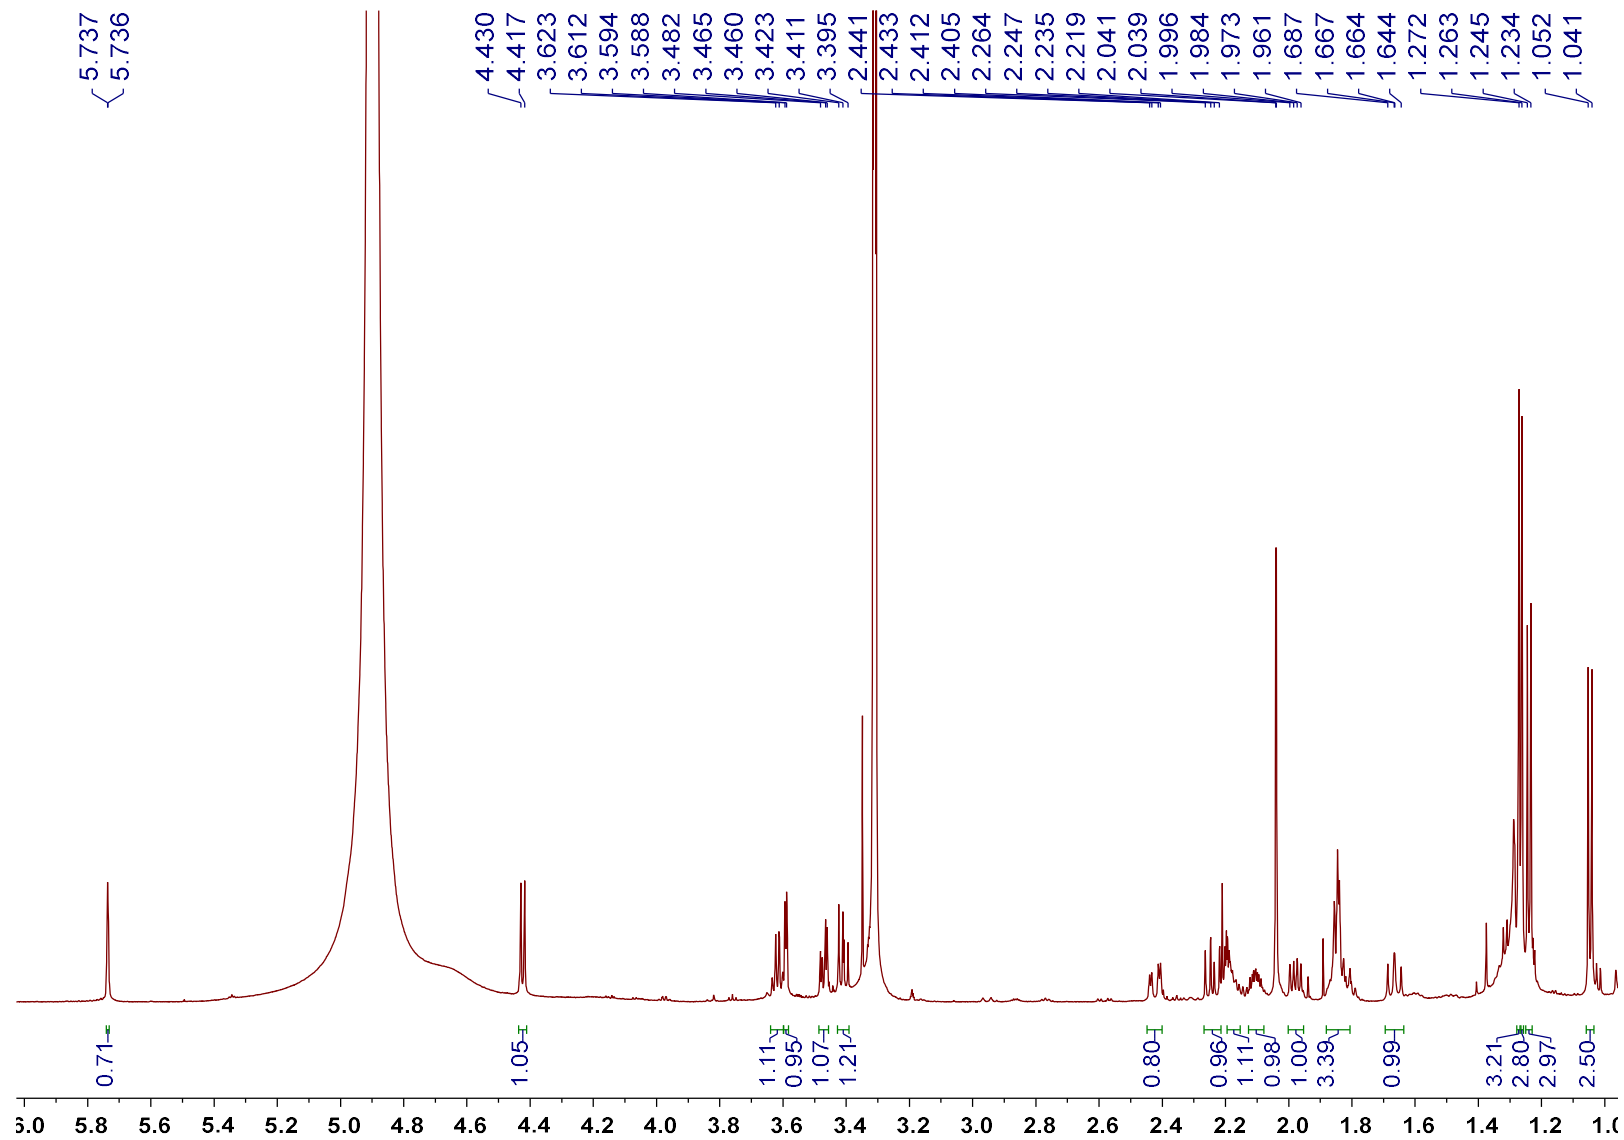

**Figure S48.** The  $^1\text{H}$  NMR spectrum of compound **5** in  $\text{CD}_3\text{OD}$

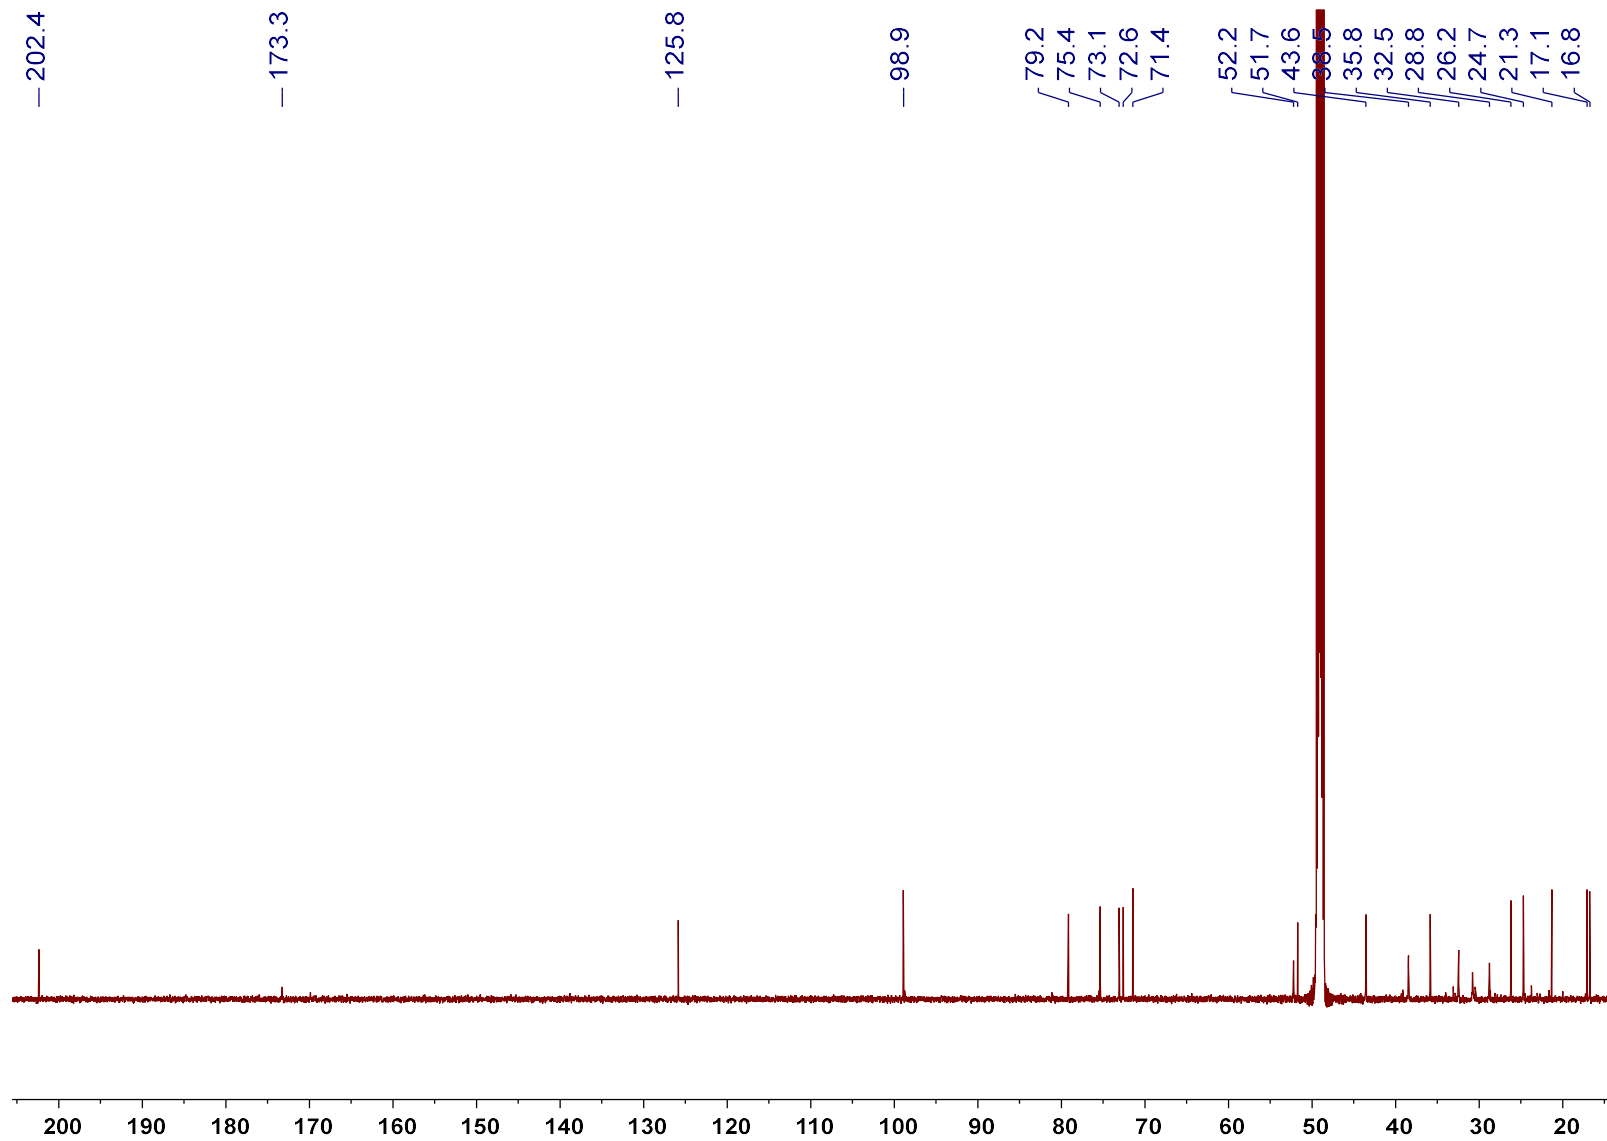

**Figure S49.** The <sup>13</sup>C NMR spectrum of compound **5** in CD<sub>3</sub>OD

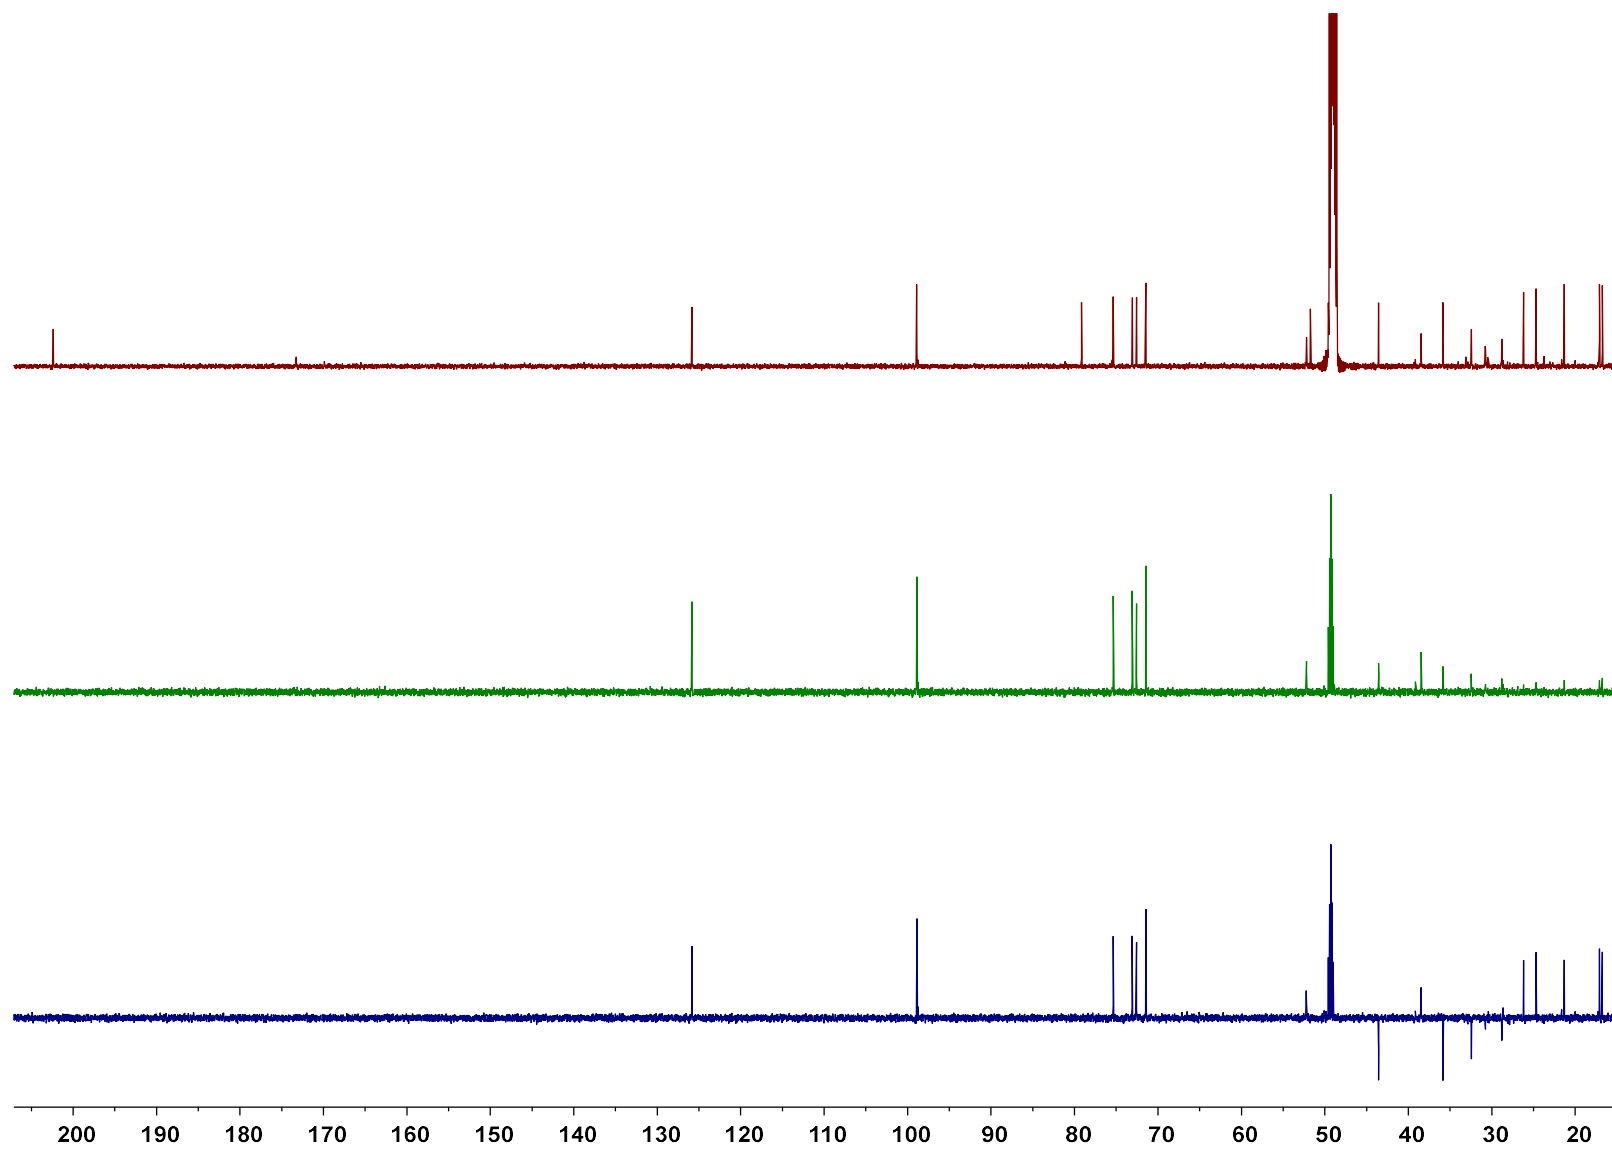

**Figure S50.** The DEPT spectrum of compound **5** in CD<sub>3</sub>OD



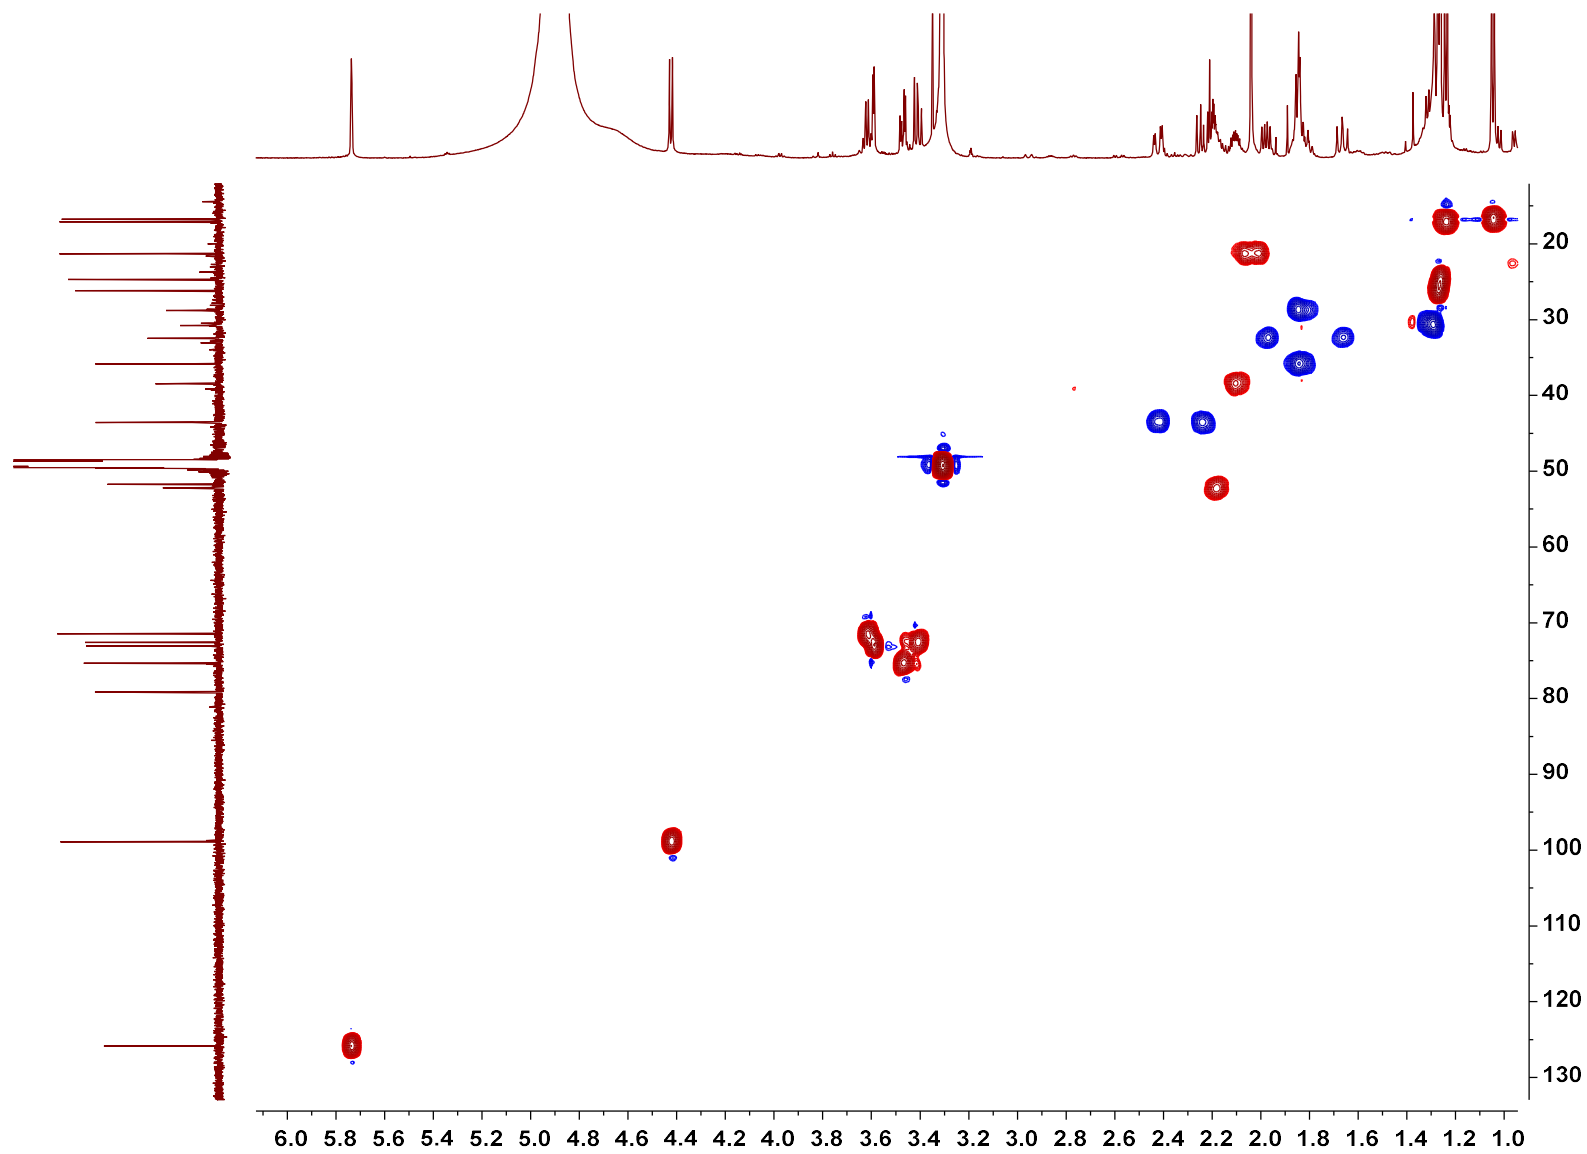

**Figure S51.** The HSQC spectrum of compound **5** in CD<sub>3</sub>OD

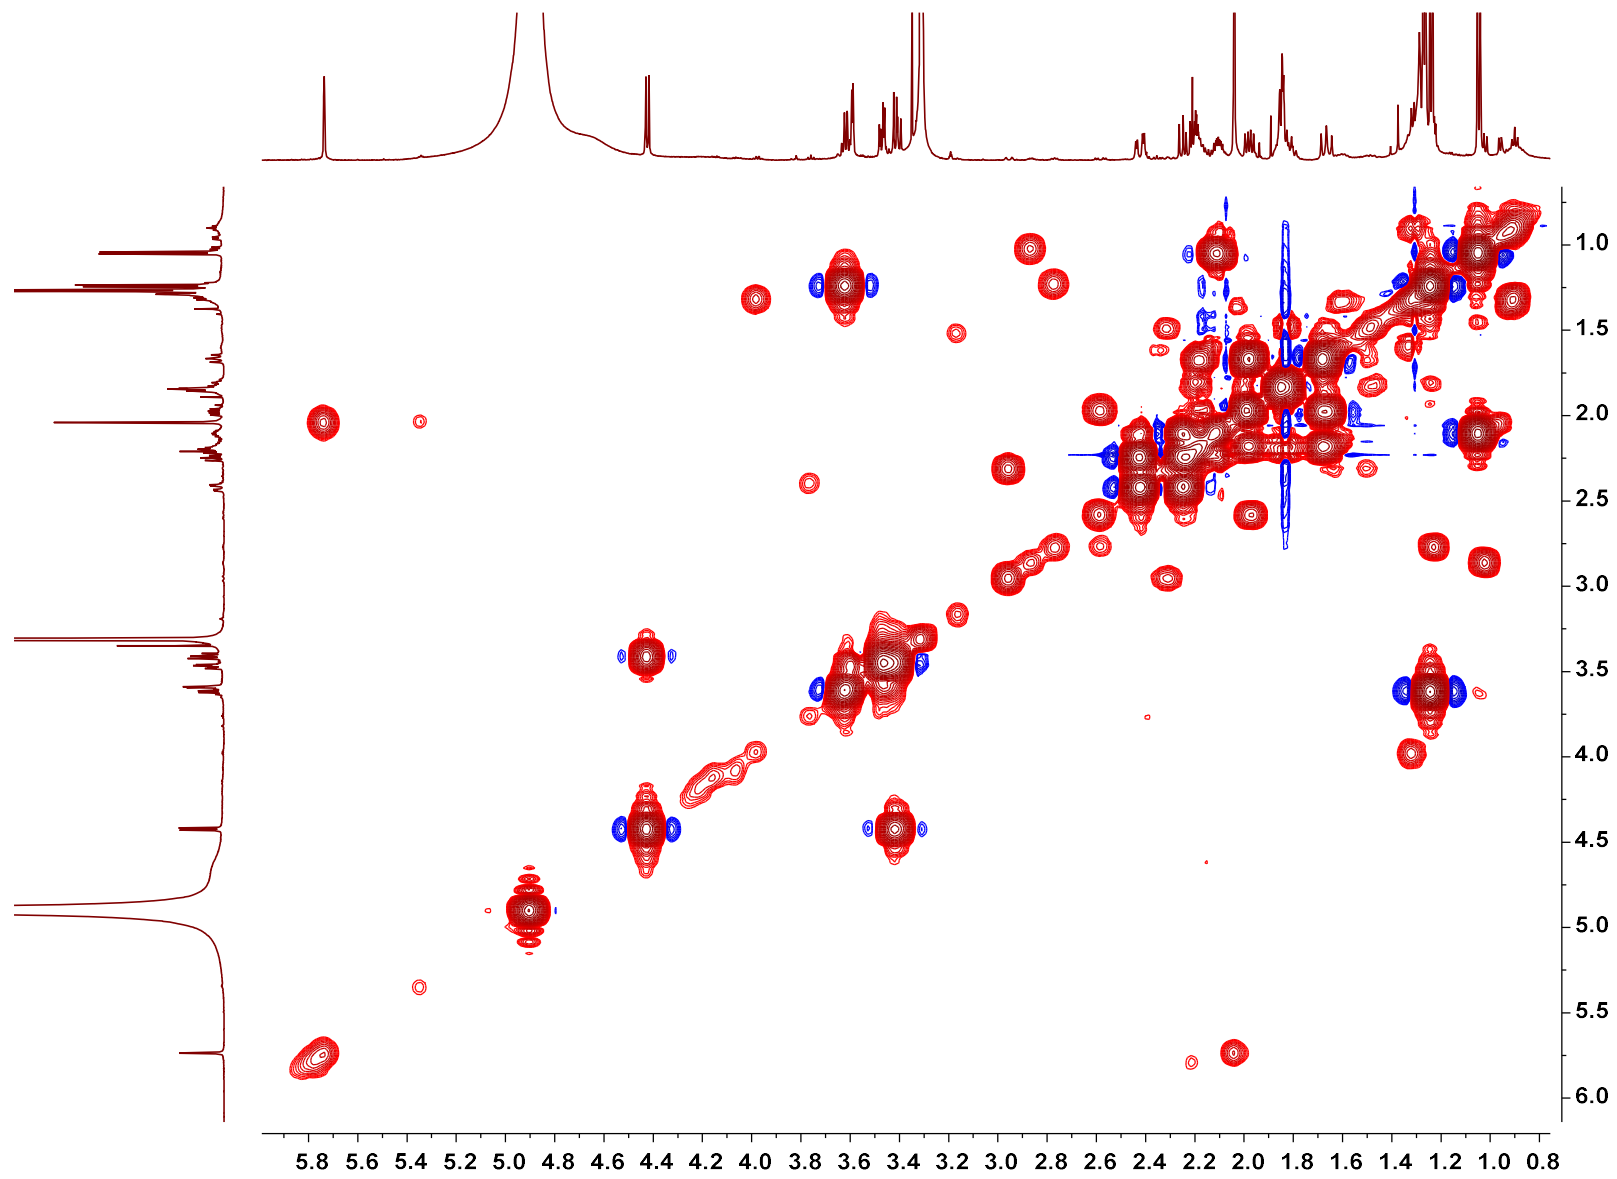

**Figure S52.** The  $^1\text{H}$ - $^1\text{H}$  COSY spectrum of compound **5** in  $\text{CD}_3\text{OD}$

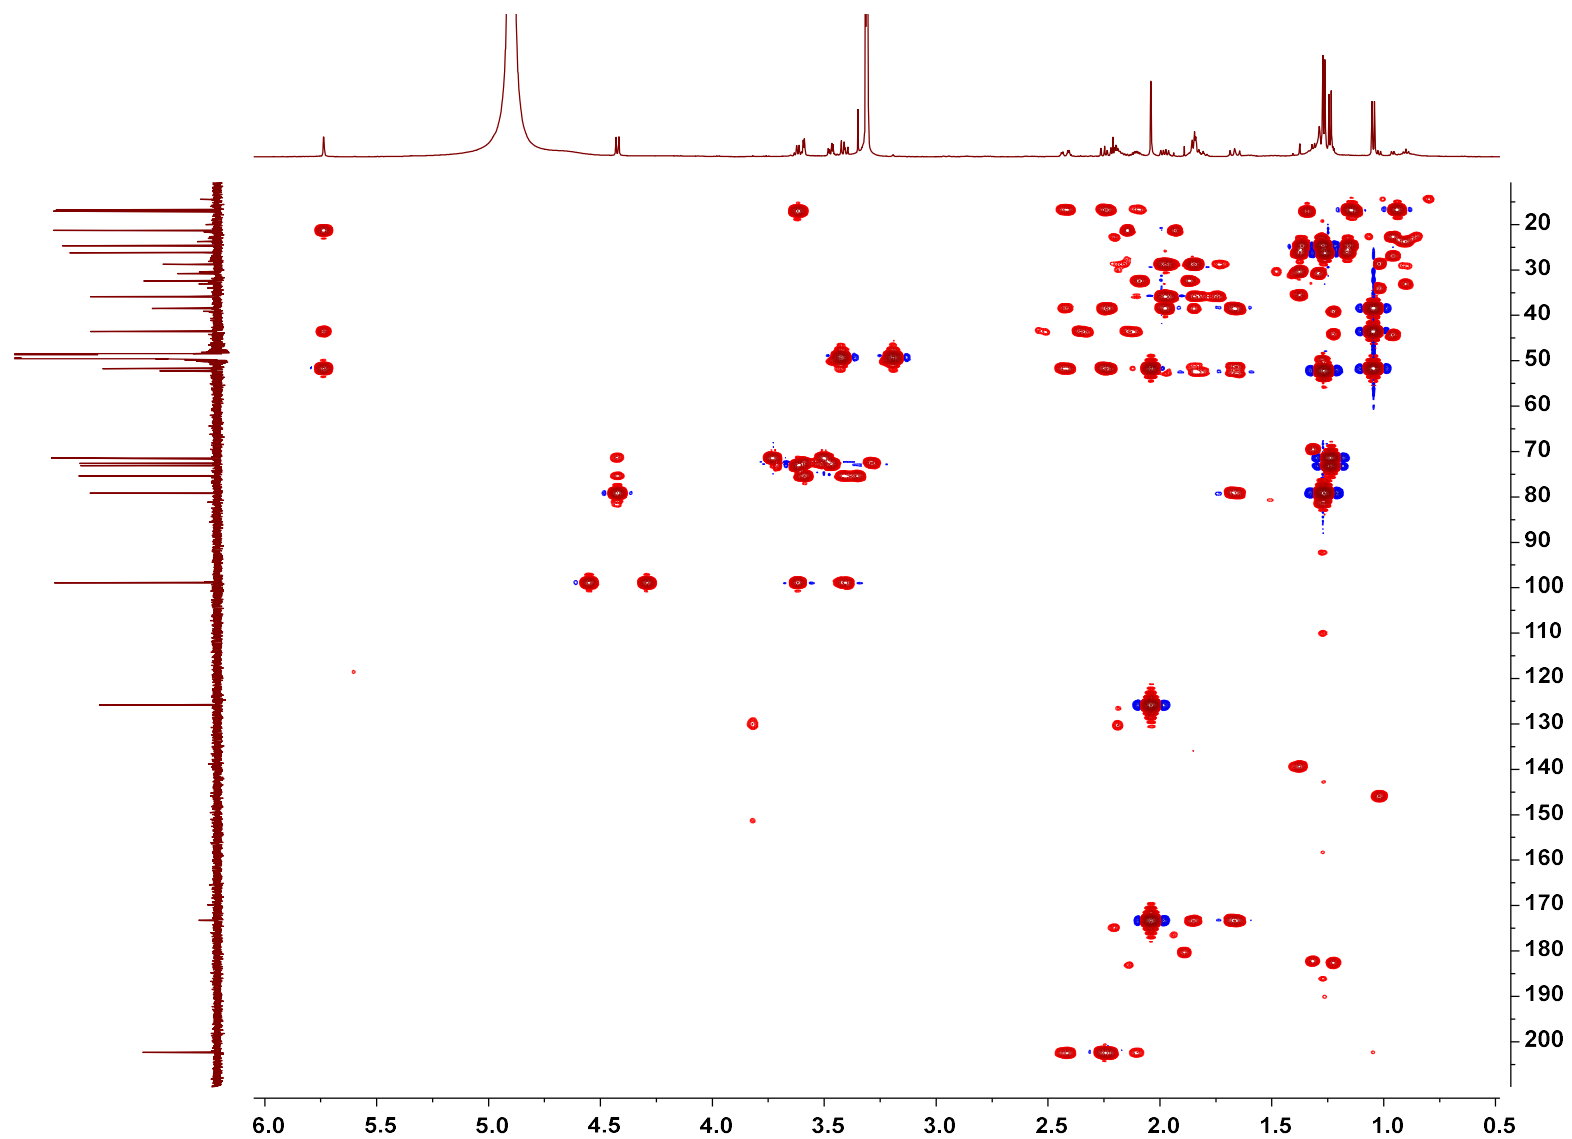

Figure S53. The HMBC spectrum of compound **5** in CD<sub>3</sub>OD

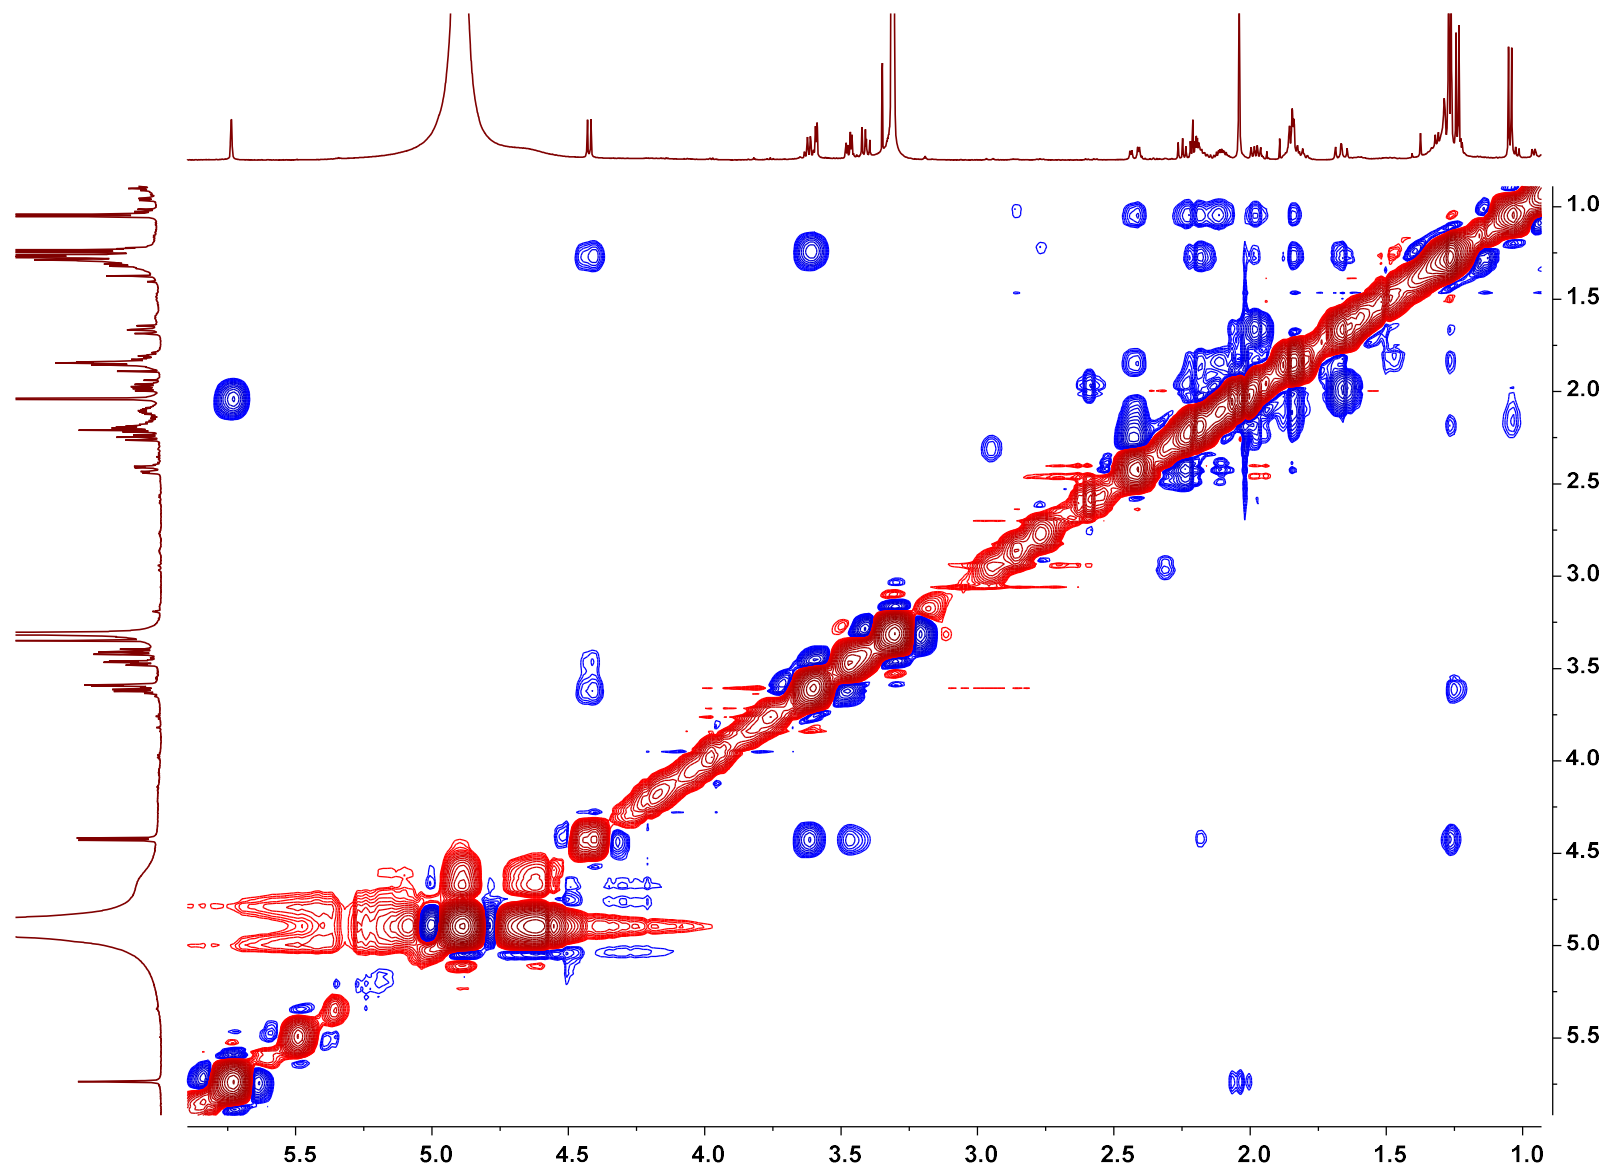

**Figure S54.** The NOESY spectrum of compound **5** in CD<sub>3</sub>OD

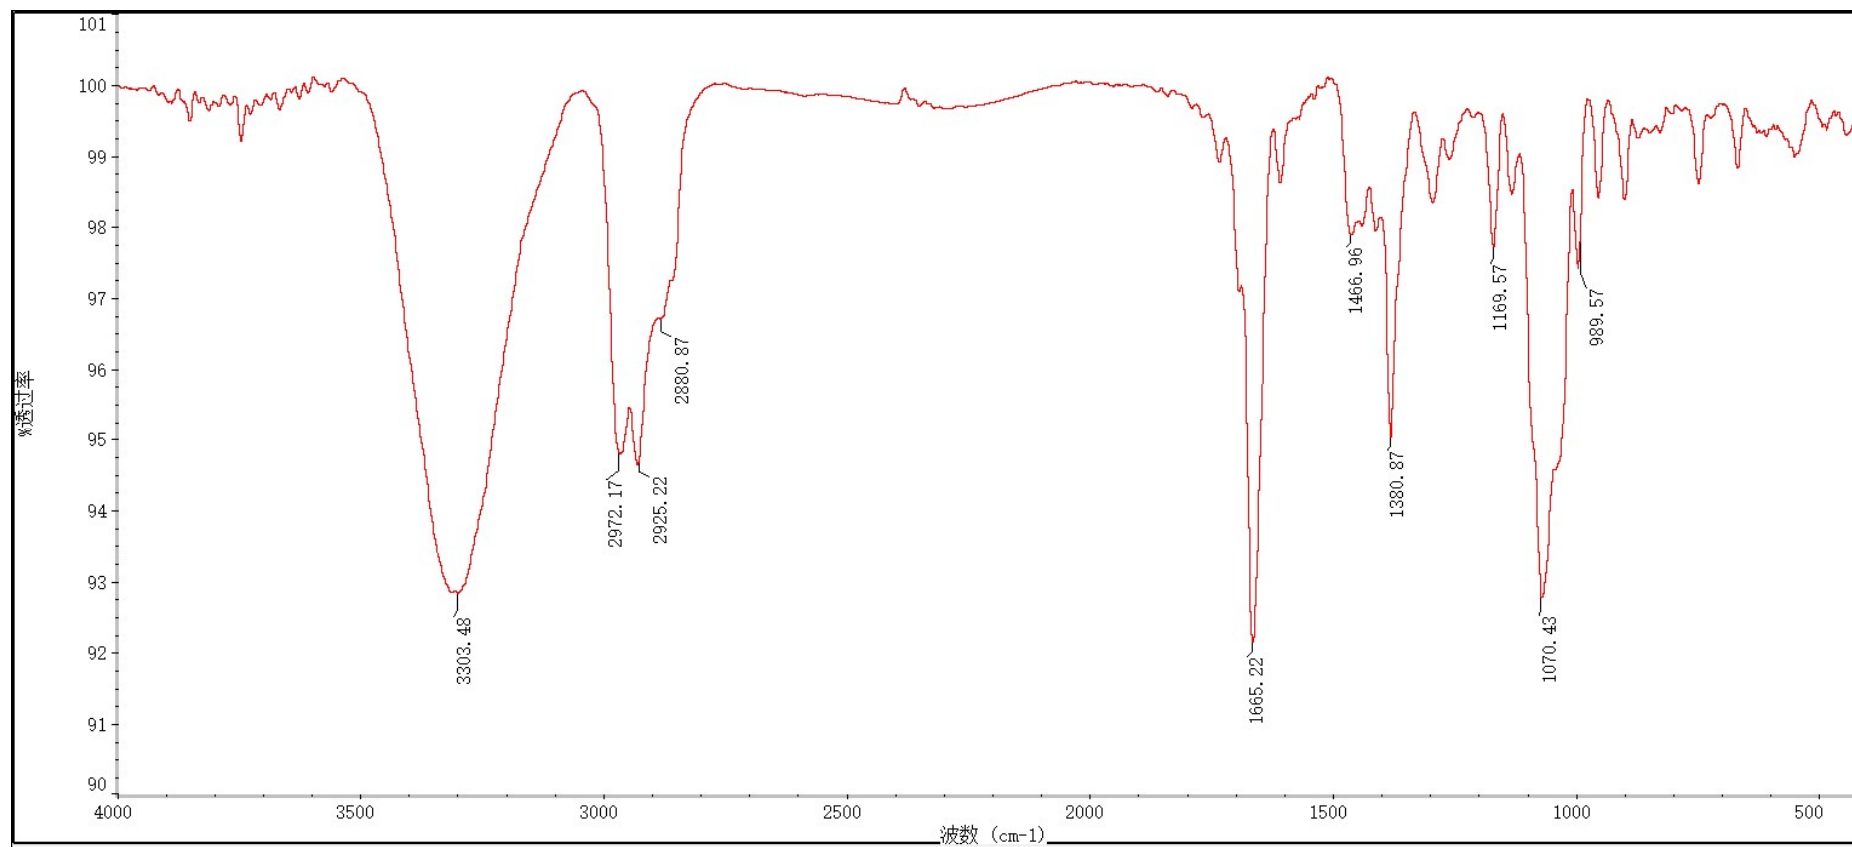

**Figure S55.** The IR spectrum of compound **5**

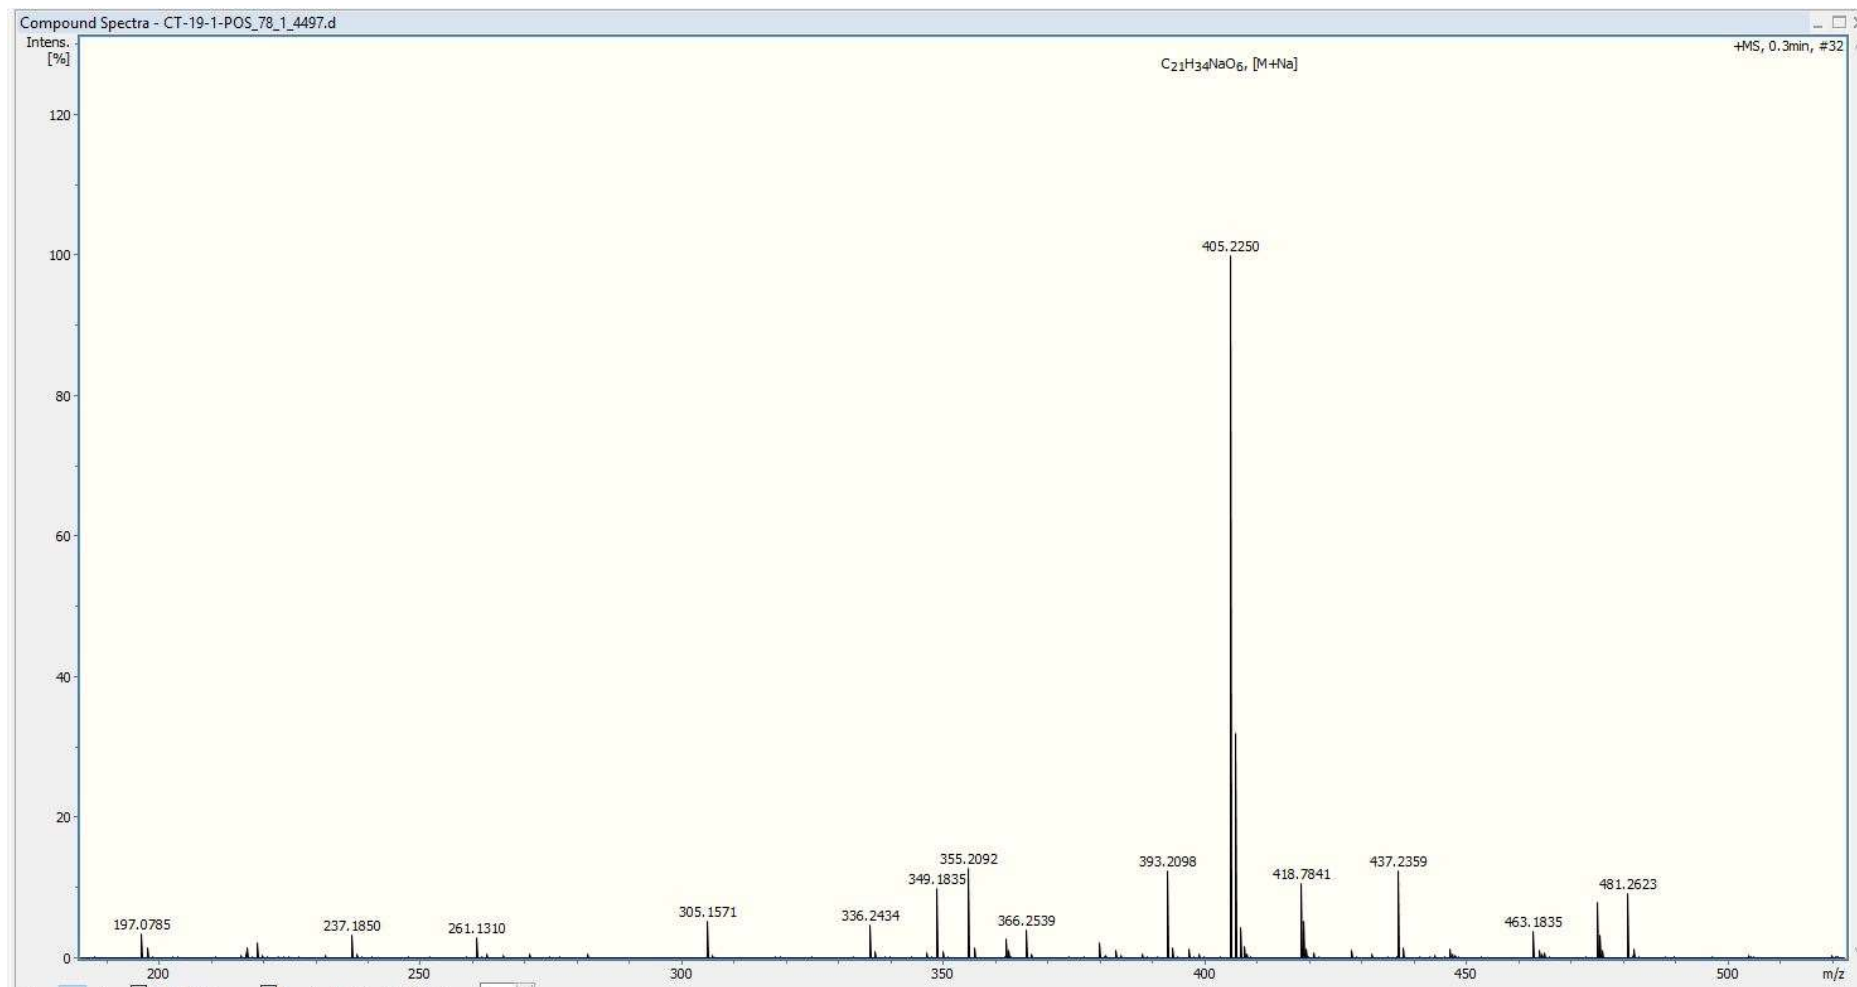

**Figure S56.** The (+)-HR-ESI-MS spectroscopic data of compound **5**

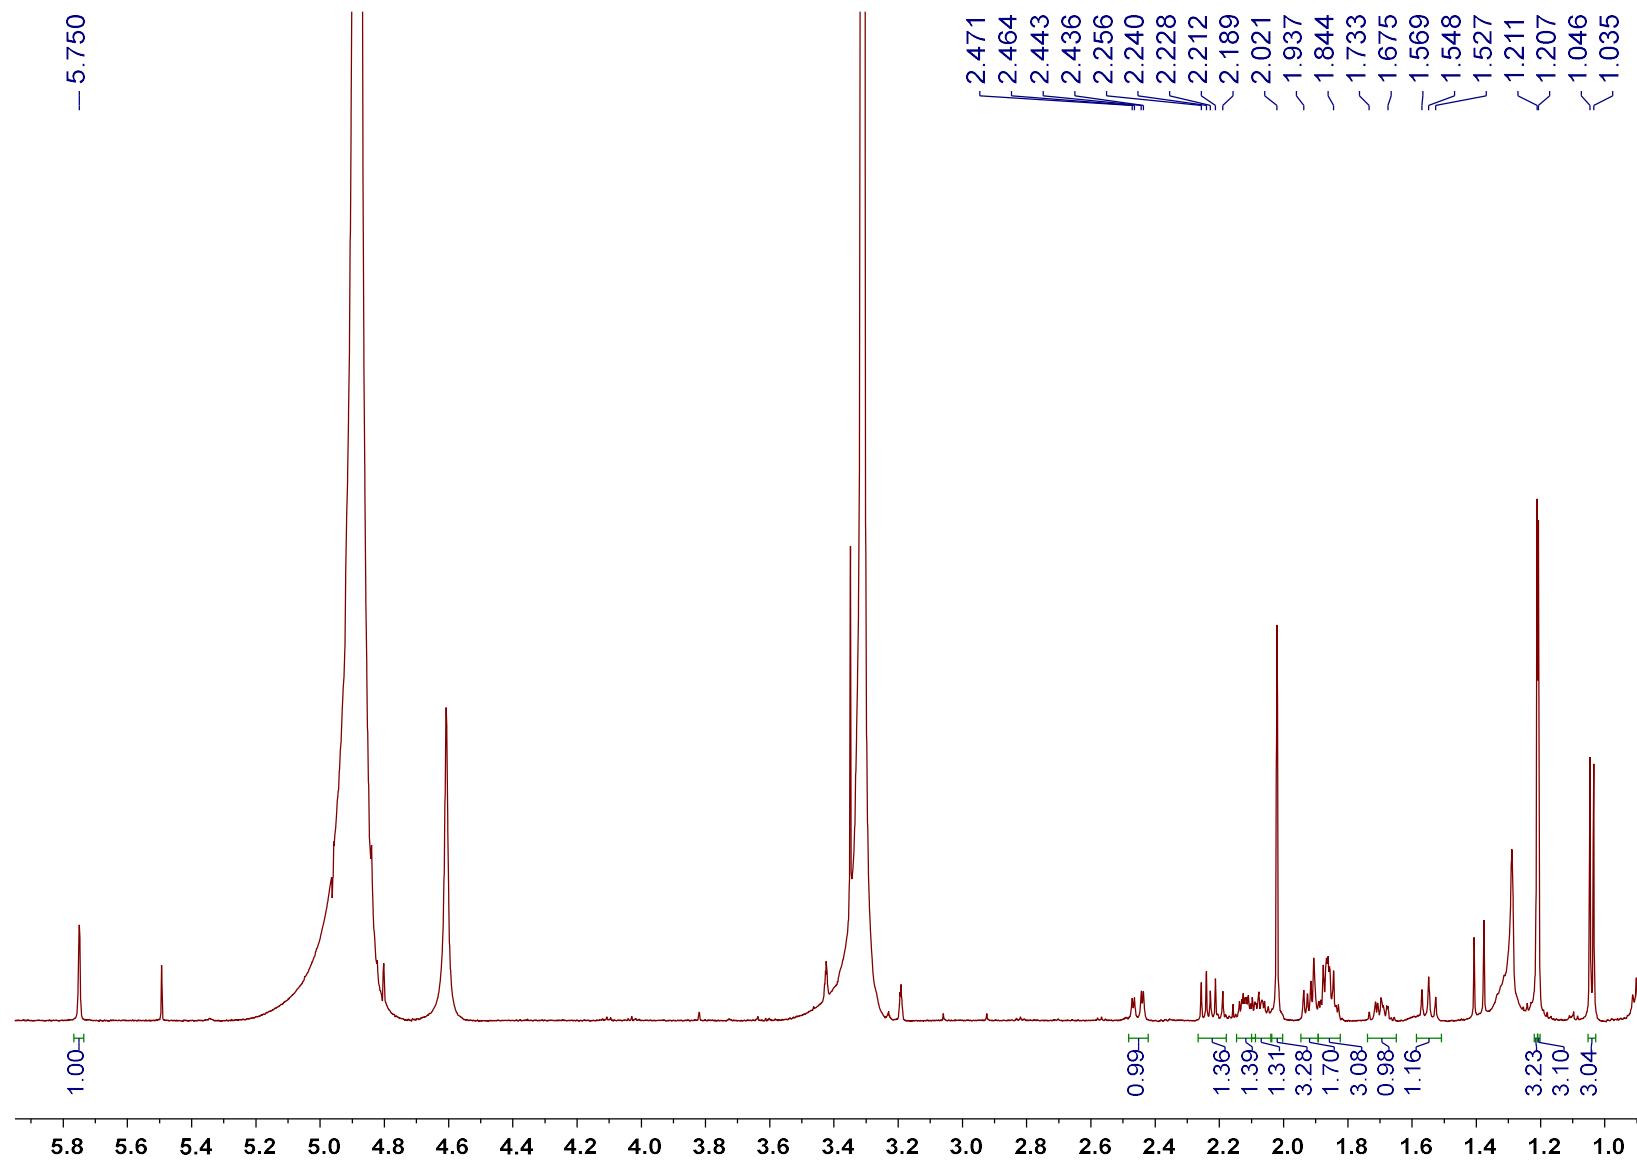

Figure S57. The  $^1\text{H}$  NMR spectrum of compound **5a** in  $\text{CD}_3\text{OD}$

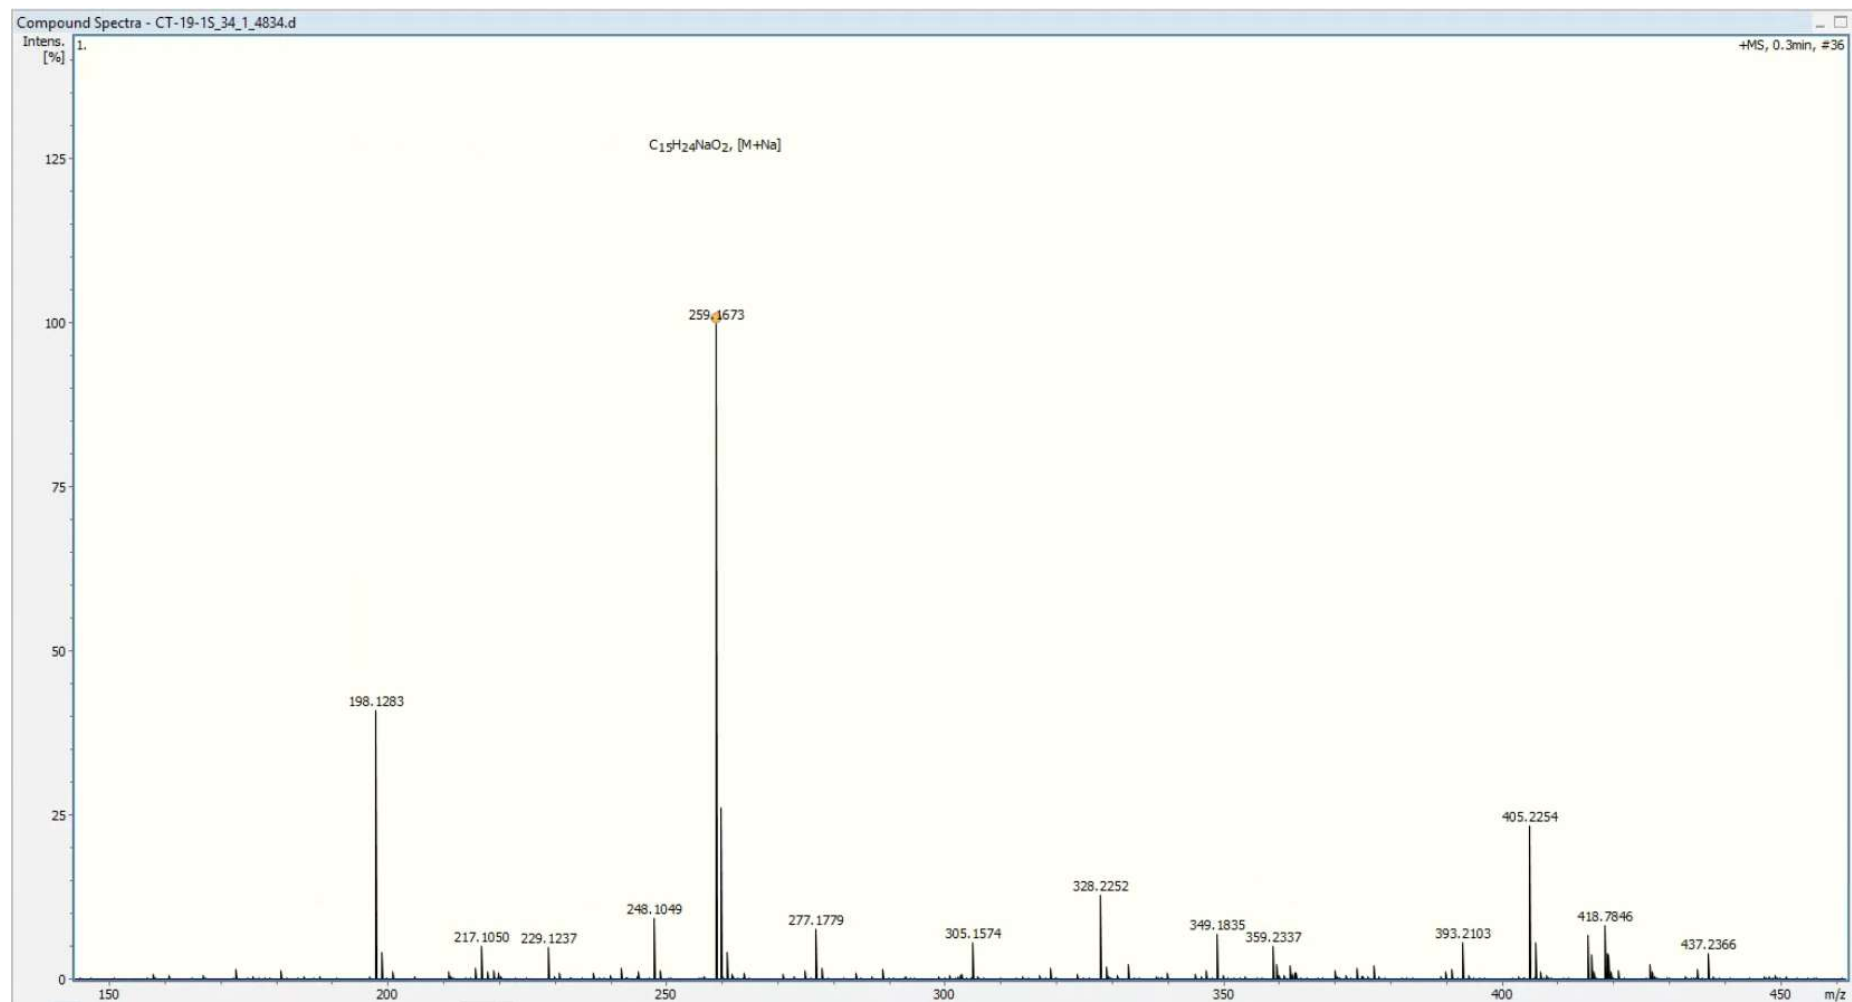

**Figure S58.** The (+)-HR-ESI-MS spectroscopic data of compound **5a**
